# Supplementary material for: Aerobic oxidation of alcohols enabled by nitrogen-doped copper nanoparticle catalysts
Source: Royal Society of Chemistry journal article supplement (doi:10.1039/d1cy01777b), 2021-11-23
Supplement: d1cy01777b1.pdf [file d1cy01777b1.pdf]

# **Aerobic Oxidation of Alcohols Enabled by Nitrogen-Doped Copper Nanoparticle Catalysts**

Fumiya Tobita, Tomohiro Yasukawa,\* Yasuhiro Yamashita and Shū Kobayashi\*

## **Electronic Supplementary Material**

### **Contents**

|                                                        |    |
|--------------------------------------------------------|----|
| 1. General                                             | 2  |
| 2. Preparation of NCI-Cu catalysts                     | 3  |
| 3. Aerobic oxidation of alcohols to aldehydes in batch | 5  |
| 4. Aerobic oxidation of alcohols to aldehydes in flow  | 6  |
| 5. Kinetic study                                       | 8  |
| 6. Control experiments                                 | 10 |
| 7. Compound characterization                           | 11 |
| 8. STEM analysis                                       | 15 |
| 9. NMR charts                                          | 17 |
| 10. References                                         | 55 |

## 1. General

- JEOL JNM-ECA 500 or ECX 600 spectrometers were used for NMR measurement.
- Chloroform ( $\delta = 7.24$ ) was used as an internal standard for  $^1\text{H}$  NMR and  $\text{CDCl}_3$  ( $\delta = 77.0$ ) for  $^{13}\text{C}$  NMR. DMSO ( $\delta = 2.49$ ) was used as an internal standard for  $^1\text{H}$  NMR and DMSO ( $\delta = 39.5$ ) for  $^{13}\text{C}$  NMR. Structures of known compounds were confirmed by comparison with commercially available compounds or data shown in literature.
- Preparative thin-layer chromatography was carried out using Wakogel B-5F.
- ICP analysis was performed on Shimadzu ICPS-7510 equipment.
- STEM/EDS images were obtained using a JEOL JEM-2100F instrument operated at 200 kV. All STEM specimens were prepared by placing a drop of the solution on carbon-coated copper grids and allowed to dry in air (without staining).
- GC analysis was performed on Shimadzu GC-2010 apparatus (Column = GL Science, TCWAX, 0.25 mm ID, 0.25  $\mu\text{m}$ , 60.0 m; Gas pressure: 214.2 kPa; Total flow: 90.6 mL/min; Column flow: 1.86 mL/min; Velocity: 30.8 cm/sec; Purge flow: 3.0 mL/min; Split ratio: 46.0; Injector: 250  $^\circ\text{C}$ , FID: 250  $^\circ\text{C}$ ; Column program: starting from 50.0  $^\circ\text{C}$ , 10 min hold, 10  $^\circ\text{C}/\text{min}$  to 220  $^\circ\text{C}$ , 5 min hold).
- XPS analysis was performed on JEOL JPS-9010MC with a Mg or an Al  $\text{K}\alpha$  X-ray source and the C 1s line at 294.2 eV was used as reference to correct the binding energies.
- Pyrolysis was conducted on ceramic tube furnace ARF-40K. The temperature was controlled by YKC-11 and gradually increased from room temperature to 500  $^\circ\text{C}$  over ca. 10 minutes.
- 4-Vinylpyridine (stabilized with HQ) was purchased from Sigma Aldrich Co. LLC. and was treated through alumina, activated before use.
- Alumina, Activated, for Column Chromatography, about 75  $\mu\text{m}$  was purchased from Wako Pure Chemical Company.
- Chloroform-d and DMSO-d<sub>6</sub> was purchased from Kanto Chemical Co. Inc..
- 2,2'-Azobis(4-methoxy-2,4-dimethylvaleronitrile) (V-70) was purchased from Wako Pure Chemical Company.
- $\text{NaBH}_4$  was purchased from Wako Pure Chemical Company and recrystallized from diglyme by heating according to the literature<sup>1</sup> and stored in a glove box.
- Ketjen black EC300J was purchased from Lion Corporation.
- Deionized water from a MILLIPORE MilliQ machine (Gradient A 10) was used without further treatment.
- Oxidation reactions in batch were conducted with Carousel<sup>TM</sup>.

- Amberlyst® A-26(OH), ion exchange resin (**A-26**) was purchased from Alfa Aesar.
- SBA-15 was prepared by following the literature.<sup>1</sup>
- 2,2,6,6-Tetramethylpiperidine 1-Oxyl (**TEMPO**) was purchased from Oakwood Products, Inc.
- 4-Acetamido-2,2,6,6-tetramethylpiperidine 1-Oxyl (**amide-TEMPO**) was prepared by following the literature.<sup>2</sup>
- Solvents were purchased in dried grade from Wako Pure Chemical Company and used without further purification.
- Flow reactions were conducted using following equipment,
  - Pump: Smooth flow pump Q-5-6R-UP-S from Tacmina Corporation,
  - Column heater: Aluminium heating block from Tokyo Rikakikai Co. Ltd.
  - Column heater controller: TTM204 from Toho Electronics Inc.
  - Mass flow controller: 8500MC from Kofloc Corp..

## 2. Preparation of NCI-Cu catalysts

**2-1. Preparation of poly(4-vinylpyridine)<sup>3</sup>:** To a solution of 4-vinylpyridine (6.43 g, 61.2 mmol) in chloroform (11 mL), V-70 (185 mg, 0.6 mmol) was added at room temperature, and the mixture was stirred until fully dissolved. The solution was degassed with sonication under Ar atmosphere and stirred for 48 h at room temperature. The mixture was added slowly to ethyl acetate (1000 mL) to generate precipitation, and the suspension was decanted. The polymer was dissolved in ethanol (5 mL), and reprecipitated for two times, followed by vacuum filtration. The polymer was dried *in vacuo* to afford poly(4-vinylpyridine) (4.46 g, 69% yield).

**2-2. Preparation of NCI-Cu:** To a stirring solution of poly(4-vinylpyridine) (150 mg) in ethanol (4 mL), a solution of Cu(OAc)<sub>2</sub>·H<sub>2</sub>O (11.2 mg, 0.056 mmol) in ethanol (1 mL) was added dropwise at room temperature under air. To this solution was added ketjen black (250 mg), and the mixture was stirred for 1 h at room temperature under air. To this mixture, a solution of NaBH<sub>4</sub> (10.6 mg, 0.28 mmol) in ethanol (1 mL) was slowly added, and the mixture was continued to stir for 2 h at room temperature under air. To this mixture was added ethyl acetate (50 mL) at room temperature and stirred for 30 min. The catalyst was filtered and washed in water (50 mL). The catalyst was filtered and washed in ethyl acetate (50 mL). After filtration, the catalyst was grinded and dried *in vacuo*. The catalyst was treated by pyrolysis at 400 °C for 5 h under Ar atmosphere. After cooling to room temperature, the catalyst was washed in ethanol (30 mL) under

air. The catalyst was filtered, washed with ethanol, water, acetone and dried *in vacuo* to afford NCI-Cu-400-5 h (0.375) (276 mg). NCI-Cu-400-5 h (0.375) (10 mg) was heated in a mixture of sulfuric acid and nitric acid at 200 °C, and the mixture was cooled to room temperature. The amount of Cu in the resulting solution was measured by ICP analysis to determine the loading of Cu (0.142 mmol/g).

**2-2. Preparation of Copolymer for PI/CB Cu<sup>4</sup>:** Styrene (2.1 g), 4-vinylbenzyl glycidyl ether (4.1 g), 2-(2-(2-(2-(4-vinylbenzyloxy)ethoxy)ethoxy)ethoxy)ethanol (6.0 g) and 2, 2'-azobis(4-methoxy)-2,4-dimethylvaleronitrile (V-70, 181.2 mg) were combined in chloroform (11.0 mL). The mixture was stirred for 48 h at room temperature. The resulting polymer solution was slowly poured into ether. Solvent was removed by decantation and remaining precipitated polymers were washed with ether several times. Polymers were dissolved in THF, repeated to precipitate for 2 times and dried *in vacuo* to afford the desired copolymer (6.86 g, 56 % yield). The molar ratio of the components was determined by <sup>1</sup>H NMR analysis ( $x: y: z = 29: 35: 36$ ).

**2-3. Preparation of PI/CB-Cu:** The Copolymer (500.0 mg), ketjen black EC300J (500.0 mg) and NaBH<sub>4</sub> (105.9 mg, 2.8 mmol) were combined in diglyme (30 mL) at room temperature, to this solution was slowly added copper(II) acetate monohydrate (55.9 mg, 0.28 mmol) with 2 mL of ethanol. The mixture was stirred for 8 h at room temperature and diethyl ether (200 mL) was slowly added to the mixture at room temperature. After the catalysts, which were black powders, were filtered and crashed, they were washed with diethyl ether several times and dried at room temperature. Next, the catalysts were heated at 150 °C for 5 h without solvent. Then the prepared solid was washed with dichloromethane, water and THF and dried to afford black powder. This powder was heated at 170 °C for 5 h without solvent to afford PI/CB-Cu. PI/CB-Cu (10-20 mg) was heated in mixture of sulfuric acid and nitric acid at 200 °C, the mixture was cooled to room temperature and aqua regia was added. The amount of copper in the resulting solution was measured by ICP analysis to determine the loading of copper.

**2-4. Preparation of SBA-15-Cu:** To a suspension of SBA-15 (500 mg) in THF (10 mL), NaBH<sub>4</sub> (143.8 mg, 3.8 mmol) in diglyme (10 mL) was added at 0 °C. To this solution was slowly added copper(II) acetate monohydrate (69.0 mg, 0.35 mmol) in THF (10 mL). The mixture was stirred for 4 h at room temperature and MeOH (100 mL) was slowly added to the mixture at room temperature. After the catalysts, which were white powders, were filtered and grinded, they were washed with water, THF and dichloromethane and dried to afford SBA-15-Cu. SBA-15-Cu (10-20 mg) was heated in mixture of sulfuric acid and nitric acid at 200 °C, the mixture was cooled to room temperature and aqua regia was added. The amount of copper in the resulting solution was measured by ICP analysis to determine the loading of copper.

### 3. Aerobic oxidation of alcohols to aldehydes in batch

**3-1. A typical procedure of aerobic oxidation of alcohols to aldehydes catalyzed by NCI-Cu:** NCI-Cu-400-5 h (0.375) (Cu: 1 mol%) was added in a Carousel<sup>TM</sup> tube and dried with heat gun *in vacuo*. 4-methyl benzyl alcohol (24.4 mg, 0.20 mmol), 2,2,6,6-tetramethylpiperidine 1-oxyl (1.6 mg, 0.01 mmol), 1-methylimidazole (1.6 µL, 0.02 mmol) and acetonitrile (1 mL) were added to the Carousel tube<sup>TM</sup>. The mixture was stirred for 20 h under 1 bar of O<sub>2</sub> atmosphere at 60 °C. If necessary, anisole (25~30 mg) as an internal standard was added to the mixture, and an aliquot of the reaction mixture (~0.02 mL) was filtered through a silica gel packed disposable Pasteur pipette and washed with ethyl acetate to inject to the GC analysis. Diethyl ether was added to the mixture and the solid catalyst was removed by filtration. After that, the solvents were removed *in vacuo* and the residue was purified by preparative TLC to afford methyl 4-methylbenzaldehyde.

**3-2. A typical procedure of aerobic oxidation of alcohols to aldehydes catalyzed by NCI-Cu in batch (Other aromatic alcohols):** NCI-Cu-400-5 h (0.375) (Cu: 1 mol%) was added in a Carousel<sup>TM</sup> tube and dried with heat gun *in vacuo*. An alcohol (0.20 mmol), 2,2,6,6-tetramethylpiperidine 1-oxyl (1.6 mg, 0.01 mmol), 1-methylimidazole (0.80-1.6 µL, 0.01-0.02 mmol) and acetonitrile (1 mL) were added to the Carousel tube<sup>TM</sup>. The mixture was stirred for 20 h under 1 bar of O<sub>2</sub> atmosphere at 60 °C. If necessary, anisole (25~30 mg) as an internal standard was added to the mixture, and an aliquot of the reaction mixture (~0.02 mL) was filtered through a silica gel packed disposable Pasteur pipette and washed with ethyl acetate to inject to the GC analysis. Ethyl acetate was added to the mixture and the solid catalyst was removed by filtration. After that, the solvents

were removed *in vacuo* and the residue was purified by preparative TLC to afford a corresponding aldehyde.

**3-3. A typical procedure of aerobic oxidation of alcohols to aldehydes catalyzed by NCI-Cu in batch (aliphatic alcohols):** NCI-Cu-400-5 h (0.375) (Cu: 2 mol%) was added in a Carousel™ tube and dried with heat gun *in vacuo*. An alcohol (0.20 mmol), 2,2,6,6-tetramethylpiperidine 1-oxyl (9.4 mg, 0.06 mmol), 1-methylimidazole (0.80  $\mu$ L, 0.01 mmol) and acetonitrile (1 mL) were added to the Carousel tube™. The mixture was stirred for 20 h under 1 bar of O<sub>2</sub> atmosphere at 60 °C. Anisole (25~30 mg) as an internal standard was added to the mixture, and an aliquot of the reaction mixture (~0.02 mL) was filtered through a silica gel packed disposable Pasteur pipette and washed with ethyl acetate to inject to the GC analysis to determine the yield. Ethyl acetate was added to the mixture and the solid catalyst was removed by filtration. After that, the solvents were removed *in vacuo* and the residue was purified by preparative TLC to afford a corresponding aldehyde.

**3-4. Recovery and reuse experiments:** NCI-Cu-400-5 h (0.375) (Cu: 1 mol%) was added in a Carousel™ tube and dried with heat gun *in vacuo*. 4-methyl benzyl alcohol (48.8 mg, 0.40 mmol), 2,2,6,6-tetramethylpiperidine 1-oxyl (3.2 mg, 0.02 mmol), 1-methylimidazole (3.2  $\mu$ L, 0.04 mmol) and acetonitrile (2 mL) were added to the Carousel tube™. The mixture was stirred for 20 h under 1 bar of O<sub>2</sub> atmosphere at 60 °C. If necessary, anisole (25~30 mg) as an internal standard was added to the mixture, and an aliquot of the reaction mixture (~0.02 mL) was filtered through a silica gel packed disposable Pasteur pipette and washed with ethyl acetate to inject to the GC analysis. The catalyst was separated by centrifugation under Ar atmosphere. The supernatant was removed by syringe. The catalyst was washed with 3 mL of ethyl acetate for three times under Ar atmosphere and was subsequently dried under vacuum for the next run.

#### 4. Aerobic oxidation of alcohols to aldehydes in flow

**4-1. A typical procedure of aerobic oxidation of alcohols to aldehydes catalyzed by NCI-Cu in flow:** A MeCN solution of benzyl alcohol (0.2 M), 2,2,6,6-tetramethylpiperidine 1-oxyl (5.0 mol%), 1-methylimidazole (5.0 mol%) was prepared in the volumetric flask. The heterogeneous NCI-Cu catalysts (0.6-0.7 g) were packed into the SUS column reactor (inner diameter = 10 mm, length = 50 mm L, column volume = 3.93 mL). Also, tiny amounts of cotton were packed into both sides of the column as a

filter. The column reactor was placed in the lab-made continuous-flow synthesis system. The column was set vertically and the flow reactions were performed with downward flow. The column reactor was washed with toluene ( $0.025 \text{ mL}\cdot\text{min}^{-1}$ ) at  $60 \text{ }^\circ\text{C}$  for 30 min. After connecting  $\text{O}_2$  gas line ( $2.0\text{-}12 \text{ mL}\cdot\text{min}^{-1}$ ), the internal pressure of the column reactor was increased to  $0.15 - 0.2 \text{ MPa}$ . After the internal pressure have stabilized, MeCN solution of benzyl alcohol ( $0.025 \text{ mL}\cdot\text{min}^{-1}$ ) and  $\text{O}_2$  gas ( $2.0\text{-}12 \text{ mL}\cdot\text{min}^{-1}$ ) were continuously flowed into the column reactor. The reaction solution containing the desired benzaldehyde was collected from the outlet and analyzed by gas chromatography (GC).

**4-2. A typical procedure of aerobic oxidation of alcohols to aldehydes catalyzed by NCI-Cu in flow (Substrate scope):** A MeCN solution of an alcohol ( $0.2 \text{ M}$ ), 2,2,6,6-tetramethylpiperidine 1-oxyl ( $5.0 \text{ mol}\%$ ), 1-methylimidazole ( $5.0 \text{ mol}\%$ ) was prepared in the volumetric flask. The heterogeneous NCI-Cu catalysts ( $0.6\text{-}0.7 \text{ g}$ ) were packed into the SUS column reactor (inner diameter =  $10 \text{ mm}$ , length =  $50 \text{ mm L}$ , column volume =  $3.93 \text{ mL}$ ). Also, tiny amounts of cotton were packed into both sides of the column as a filter. The column reactor was placed in the lab-made continuous-flow synthesis system. The column was set vertically and the flow reactions were performed with downward flow. The column reactor was washed with toluene ( $0.025 \text{ mL}\cdot\text{min}^{-1}$ ) at  $60 \text{ }^\circ\text{C}$  for 30 min. After connecting  $\text{O}_2$  gas line ( $12 \text{ mL}\cdot\text{min}^{-1}$ ), the internal pressure of the column reactor was increased to  $0.15 - 0.2 \text{ MPa}$ . After the internal pressure have stabilized, MeCN solution of benzyl alcohol ( $0.025 \text{ mL}\cdot\text{min}^{-1}$ ) and  $\text{O}_2$  gas ( $12 \text{ mL}\cdot\text{min}^{-1}$ ) were continuously flowed into the column reactor. The reaction solution containing the desired aldehyde was collected 5 h and 10 h after the start of the reaction and analyzed by gas chromatography (GC).

**4-3. An application to sequential- and continuous-flow systems:** A toluene solution of benzyl alcohol ( $0.2 \text{ M}$ ), 2,2,6,6-tetramethylpiperidine 1-oxyl ( $5.0 \text{ mol}\%$ ), 1-methylimidazole ( $5.0 \text{ mol}\%$ ) was prepared in the volumetric flask. The heterogeneous NCI-Cu catalysts ( $0.6\text{-}0.7 \text{ g}$ ) were packed into the SUS column reactor (inner diameter =  $10 \text{ mm}$ , length =  $50 \text{ mm L}$ , column volume =  $3.93 \text{ mL}$ ). Also, tiny amounts of cotton were packed into both sides of the column as a filter. The column reactor was placed in the lab-made continuous-flow synthesis system. The column was set vertically and the flow reactions were performed with downward flow. The column reactor was washed with toluene ( $0.075 \text{ mL}\cdot\text{min}^{-1}$ ) at  $60 \text{ }^\circ\text{C}$  for 30 min. After connecting  $\text{O}_2$  gas line ( $36 \text{ mL}\cdot\text{min}^{-1}$ ), the internal pressure of the column reactor was increased to  $0.15 - 0.2 \text{ MPa}$ . After the internal pressure have stabilized, MeCN solution of benzyl alcohol ( $0.075 \text{ mL}\cdot\text{min}^{-1}$ ) and  $\text{O}_2$  gas ( $36 \text{ mL}\cdot\text{min}^{-1}$ ) were continuously flowed into the column reactor.

The reaction solution containing the desired benzaldehyde was collected in a volumetric flask to remove O<sub>2</sub> gas. The crude solution and a toluene/*i*PrOH (4/1) solution of  $\alpha$ -tetralone (1.2 equiv) were flowed into another volumetric flask and stirred, then the mixed solution was flowed into the second SUS column reactor (inner diameter = 10 mm, length = 150 mm L, column volume = 11.8 mL) packed with A-26 (11 g). The column was set vertically and the flow reactions were performed with upward flow. The desired unsaturated ketone **5** was obtained from the outlet and the crude solution was analyzed by gas chromatography (GC). A-26 catalysts were washed by toluene/*i*PrOH (4/1) solution in advance.

**4-4. Further conversion of ketone 5 to dihydropyrimidinone 6 in batch:** 1 mL of the crude solution (0.2 M) containing unsaturated ketone **5** after sequential- and continuous-flow reaction was added in a Carousel<sup>TM</sup> tube and dried *in vacuo*. Then, thiourea (30.4 mg, 0.40 mmol) and A-26 (100 mg) and *i*PrOH (1 mL) were added to the Carousel tube<sup>TM</sup>. The mixture was stirred for 24 h at 80 °C. After 24 h, the precipitation was filtered and was washed with DCM to obtain pure dihydropyrimidinone **6** (78%, over 3 steps).

## 5. Kinetic study

**5-1. Kinetic study in flow:** A MeCN solution of benzyl alcohol (0.2 M), 2,2,6,6-tetramethylpiperidine 1-oxyl (5.0 mol%), 1-methylimidazole (5.0 mol%) was prepared in the volumetric flask. The heterogeneous NCI-Cu catalysts (0.6-0.7 g) were packed into the SUS column reactor (inner diameter = 10 mm, length = 50 mm L, column volume = 3.93 mL). Also, tiny amounts of cotton were packed into both sides of the column as a filter. The column reactor was placed in the lab-made continuous-flow synthesis system. The column was set vertically and the flow reactions were performed with downward flow. The column reactor was washed with toluene (0.25-0.45 mL•min<sup>-1</sup>) at 60 °C for 30 min. After connecting air or O<sub>2</sub> gas line (2.0-12 mL•min<sup>-1</sup>), the internal pressure of the column reactor was increased to 0.15 - 0.2 MPa. After the internal pressure have stabilized, MeCN solution of benzyl alcohol (0.25-0.45 mL•min<sup>-1</sup>) and air or O<sub>2</sub> gas (2.0-12 mL•min<sup>-1</sup>) were continuously flowed into the column reactor. The reaction solution



containing the desired benzaldehyde was collected from the outlet and analyzed by gas chromatography (GC).

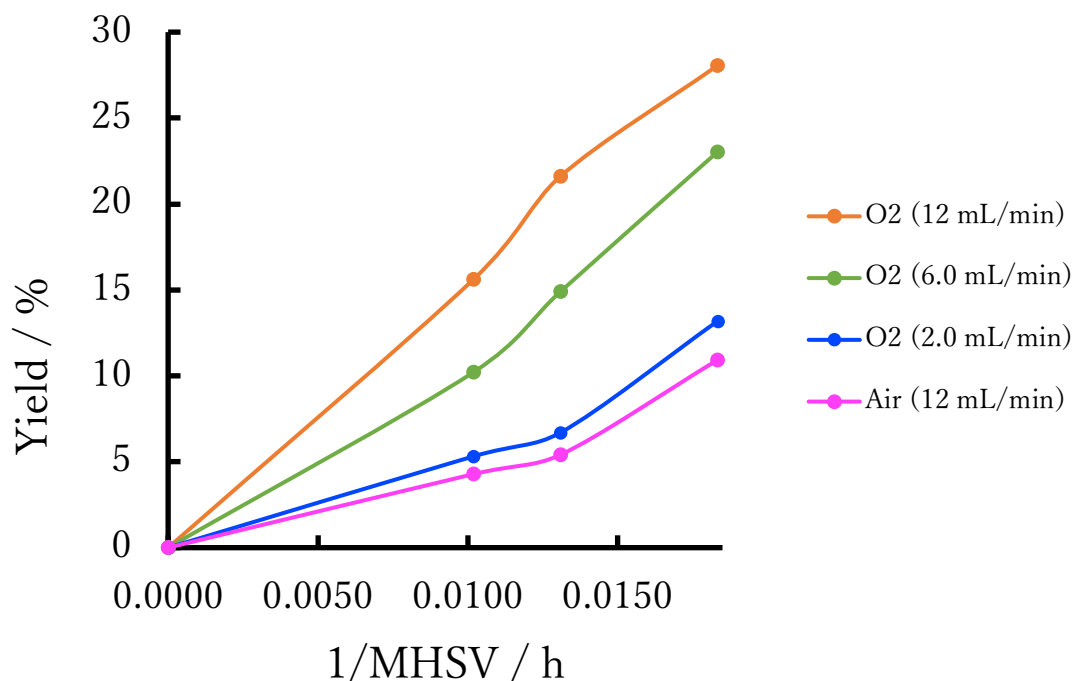

**Figure S1.** Kinetic study with a different flow rate of O<sub>2</sub> or air in flow

**5-2. Kinetic study with additives in batch:** NCI-Cu-400-5 h (0.375) (Cu: 1 mol%) was added in a Carousel<sup>TM</sup> tube and dried with heat gun *in vacuo*. 4-methyl benzyl alcohol (24.4 mg, 0.20 mmol), 2,2,6,6-tetramethylpiperidine 1-oxyl (1.6 mg, 0.01 mmol), 1-methylimidazole (1.6  $\mu$ l, 0.02 mmol), additives (1-methylimidazole, H<sub>2</sub>O or piperidine 7) and acetonitrile (1 mL) were added to the Carousel tube<sup>TM</sup>. The mixture was stirred for 20 h under 1 bar of O<sub>2</sub> atmosphere at 60 °C. If necessary, anisole (25~30 mg) as an internal standard was added to the mixture, and an aliquot of the reaction mixture (~0.02 mL) was filtered through a silica gel packed disposable Pasteur pipette and washed with ethyl acetate to inject to the GC analysis.

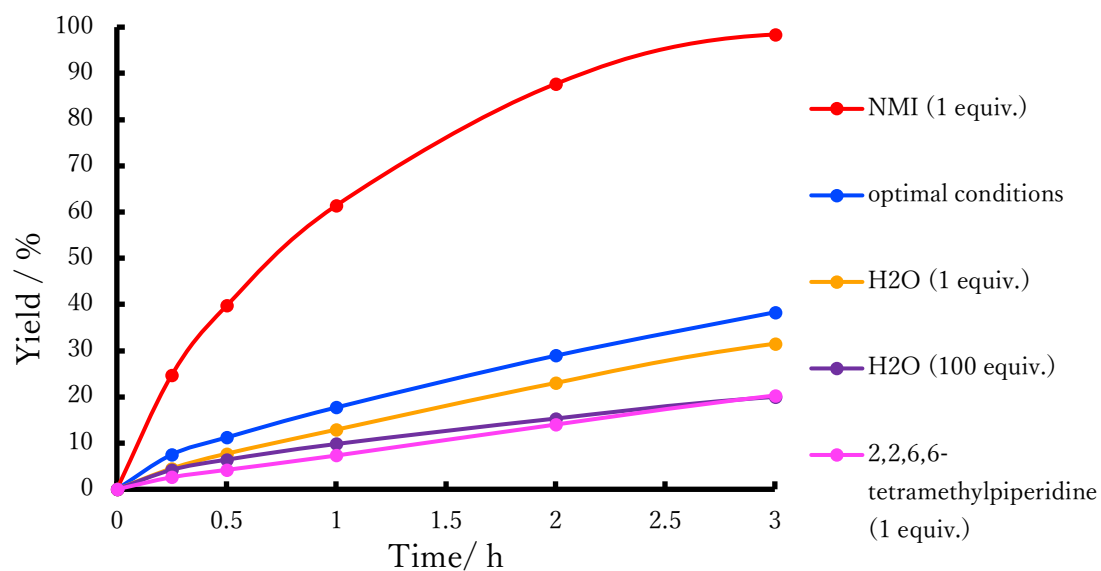

**Figure S2.** Kinetic study with additives in batch

## 6. Control experiments

**Table S1.** Control studies

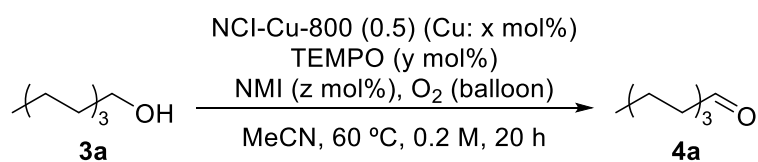

| entry | x | y | z  | yield (%) <sup>a</sup> |
|-------|---|---|----|------------------------|
| 1     | 1 | 5 | 10 | 15                     |
| 2     | 1 | 0 | 10 | 0                      |
| 3     | 1 | 5 | 0  | 7                      |
| 4     | 0 | 5 | 10 | 0                      |

<sup>a</sup> Determined by GC analysis.

## 7. Compound characterization

**4-Methylbenzaldehyde (2a)**<sup>5</sup>: Colorless liquid; determined by GC analysis. <sup>1</sup>H NMR

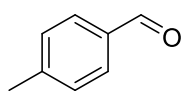

(CDCl<sub>3</sub>, 600 MHz)  $\delta$  = 2.41 (s, 3H), 7.30 (d, 2H,  $J$  = 7.6 Hz), 7.75 (d, 1H,  $J$  = 8.3 Hz), 9.95 (s, 1H); <sup>13</sup>C NMR (CDCl<sub>3</sub>, 150 MHz)  $\delta$  = 21.8, 129.7, 129.8, 134.2, 145.5, 191.9.

**4-Isopropylbenzaldehyde (2b)**<sup>6</sup>: Colorless liquid; <sup>1</sup>H NMR (CDCl<sub>3</sub>, 500 MHz)  $\delta$  = 1.28

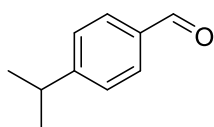

(d, 6H,  $J$  = 6.8 Hz), 2.99 (septet, 1H,  $J$  = 6.8 Hz), 7.39 (d, 2H,  $J$  = 7.9 Hz), 7.81 (d, 2H,  $J$  = 7.9 Hz), 9.97 (s, 1H); <sup>13</sup>C NMR (CDCl<sub>3</sub>, 150 MHz)  $\delta$  = 23.6, 34.4, 127.1, 129.9, 134.5, 156.2, 192.0.

**4-Chlorobenzaldehyde (2c)**<sup>5</sup>: Colorless solid; <sup>1</sup>H NMR (CDCl<sub>3</sub>, 600 MHz)  $\delta$  = 7.52 (d,

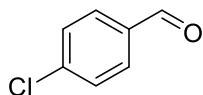

2H,  $J$  = 8.3 Hz), 7.83 (d, 2H,  $J$  = 8.3 Hz), 9.99 (s, 1H); <sup>13</sup>C NMR (CDCl<sub>3</sub>, 150 MHz)  $\delta$  = 129.4, 130.9, 134.7, 140.9, 190.8.

**4-Bromobenzaldehyde (2d)**<sup>5</sup>: Colorless solid; <sup>1</sup>H NMR (CDCl<sub>3</sub>, 600 MHz)  $\delta$  = 7.68 (d,

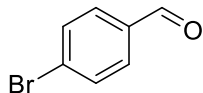

1H,  $J$  = 8.3 Hz), 7.74 (d, 1H,  $J$  = 8.3 Hz), 9.97 (s, 1H); <sup>13</sup>C NMR (CDCl<sub>3</sub>, 150 MHz)  $\delta$  = 129.7, 130.9, 132.4, 135.0, 191.0.

**2-Bromobenzaldehyde (2e)**<sup>5</sup>: Colorless solid; <sup>1</sup>H NMR (CDCl<sub>3</sub>, 600 MHz)  $\delta$  = 7.42-7.47

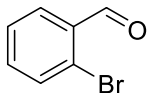

(m, 2H), 7.65-7.66 (m, 1H), 7.92 (dt, 1H,  $J$  = 6.9, 1.4 Hz), 10.37 (s, 1H); <sup>13</sup>C NMR (CDCl<sub>3</sub>, 150 MHz)  $\delta$  = 127.1, 127.9, 129.9, 133.5, 133.9, 135.3, 191.8.

**4-Methoxybenzaldehyde (2f)**<sup>5</sup>: Colorless liquid; <sup>1</sup>H NMR (CDCl<sub>3</sub>, 600 MHz)  $\delta$  = 3.85

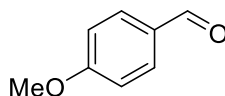

(s, 3H), 6.97 (d, 2H,  $J$  = 8.9 Hz), 7.80 (d, 2H,  $J$  = 8.9 Hz), 9.85 (s, 1H); <sup>13</sup>C NMR (CDCl<sub>3</sub>, 150 MHz)  $\delta$  = 55.5, 114.2, 129.9, 131.9, 164.6, 190.7.

**3-Methoxybenzaldehyde (2g)**<sup>7</sup>: Colorless liquid; <sup>1</sup>H NMR (CDCl<sub>3</sub>, 500 MHz)  $\delta$  = 3.86

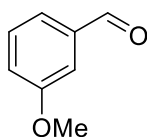

(s, 3H), 7.18 (td, 1H,  $J$  = 4.5, 2.4 Hz), 7.39 (d, 1H,  $J$  = 2.3 Hz), 7.42-7.46 (m, 2H), 9.97 (s, 1H); <sup>13</sup>C NMR (CDCl<sub>3</sub>, 150 MHz)  $\delta$  = 55.0, 111.6, 121.1, 123.1, 129.6, 137.3, 159.7, 191.7.

**2-Methoxybenzaldehyde (2h)**<sup>7</sup>: Colorless liquid; <sup>1</sup>H NMR (CDCl<sub>3</sub>, 600 MHz)  $\delta$  = 3.94

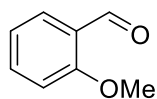

(s, 3H), 7.00 (d, 1H,  $J$  = 8.3 Hz), 7.03 (t, 1H,  $J$  = 7.2 Hz), 7.54-7.57 (m, 1H), 7.84 (dd, 1H,  $J$  = 7.5, 1.4 Hz), 10.48 (s, 1H); <sup>13</sup>C NMR (CDCl<sub>3</sub>, 150 MHz)  $\delta$  = 55.6, 111.6, 120.6, 124.8, 128.5, 135.9, 161.8, 189.8.

**4-Nitrobenzaldehyde (2i)**<sup>5</sup>: Pale yellow solid; <sup>1</sup>H NMR (CDCl<sub>3</sub>, 600 MHz)  $\delta$  = 8.08 (d,

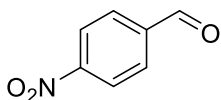

2H,  $J$  = 8.9 Hz), 8.39 (d, 2H,  $J$  = 8.3 Hz), 10.16 (s, 1H); <sup>13</sup>C NMR (CDCl<sub>3</sub>, 150 MHz)  $\delta$  = 124.3, 130.4, 140.0, 151.1, 190.3.

**4-(Trifluoromethyl)benzaldehyde (2j)**<sup>5</sup>: Colorless liquid; <sup>1</sup>H NMR (CDCl<sub>3</sub>, 600 MHz)

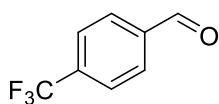

$\delta$  = 7.81 (d, 2H,  $J$  = 8.3 Hz), 8.01 (d, 2H,  $J$  = 7.6 Hz), 10.10 (s, 1H); <sup>13</sup>C NMR (CDCl<sub>3</sub>, 150 MHz)  $\delta$  = 123.4 (q,  $J$  = 271.5 Hz), 126.1 (q,  $J$  = 4.3 Hz), 129.9, 135.6 (q,  $J$  = 33.0 Hz), 138.6, 191.0.

**2-Naphthaldehyde (2k)**<sup>5</sup>: Pale orange solid; <sup>1</sup>H NMR (CDCl<sub>3</sub>, 600 MHz)  $\delta$  = 7.58 (dd,

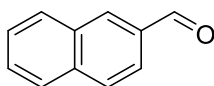

1H,  $J$  = 8.3, 6.9 Hz), 7.64 (t, 1H,  $J$  = 7.2 Hz), 7.89 (d, 1H,  $J$  = 8.3 Hz), 7.91-7.96 (m, 2H), 7.99 (d, 1H,  $J$  = 7.6 Hz), 8.32 (s, 1H), 10.15 (s, 1H); <sup>13</sup>C NMR (CDCl<sub>3</sub>, 150 MHz)  $\delta$  = 122.7, 127.0, 128.0, 129.0,

129.1, 129.5, 132.6, 134.0, 134.5, 136.4, 192.2.

**Piperonal (2l)**<sup>5</sup>: Colorless solid; <sup>1</sup>H NMR (CDCl<sub>3</sub>, 600 MHz)  $\delta$  = 6.07 (s, 2H), 6.93 (d,

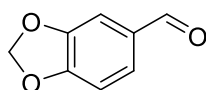

1H,  $J$  = 8.3 Hz), 7.33 (d, 1H,  $J$  = 1.4 Hz), 7.41 (dd, 1H,  $J$  = 7.9, 1.7 Hz), 9.81 (s, 1H); <sup>13</sup>C NMR (CDCl<sub>3</sub>, 150 MHz)  $\delta$  = 102.0, 106.8, 108.3, 128.6, 131.8, 148.6, 153.0, 190.2.

**trans-Cinnamaldehyde (2m)**<sup>5</sup>: Colorless liquid; <sup>1</sup>H NMR (CDCl<sub>3</sub>, 500 MHz)  $\delta$  = 6.73

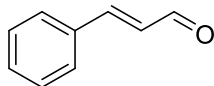

(dd, 1H,  $J$  = 15.9, 7.4 Hz), 7.41-7.46 (m, 3H), 7.48 (d, 1H,  $J$  = 15.9 Hz), 7.56-7.58 (m, 2H), 9.71 (d, 1H,  $J$  = 7.4 Hz); <sup>13</sup>C NMR (CDCl<sub>3</sub>, 125 MHz)  $\delta$  = 128.4, 128.6, 129.1, 131.2, 134.0, 152.7, 193.7.

**Furfural (2n)**<sup>8</sup>: Colorless liquid; <sup>1</sup>H NMR (CDCl<sub>3</sub>, 600 MHz)  $\delta$  = 6.59 (dd, 1H,  $J$  = 3.4,

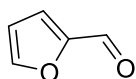

1.4 Hz), 7.24 (d, 1H,  $J$  = 3.4 Hz), 7.68 (s, 1H), 9.65 (s, 1H); <sup>13</sup>C NMR (CDCl<sub>3</sub>, 150 MHz)  $\delta$  = 112.4, 121.1, 147.9, 152.7, 177.6.

**Thiophene-2-carboxaldehyde (2o)<sup>5</sup>:** Colorless liquid; <sup>1</sup>H NMR (CDCl<sub>3</sub>, 600 MHz)  $\delta$  =

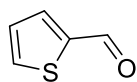

182.4.

7.22 (t, 1H,  $J$  = 4.5 Hz), 7.77 (d, 1H,  $J$  = 4.8 Hz), 7.79 (d, 1H,  $J$  = 4.1 Hz),  
9.95 (s, 1H); <sup>13</sup>C NMR (CDCl<sub>3</sub>, 150 MHz)  $\delta$  = 127.8, 134.6, 135.8, 143.5,

**Benzaldehyde (2p)<sup>5</sup>:** Colorless liquid; <sup>1</sup>H NMR (CDCl<sub>3</sub>, 600 MHz)  $\delta$  = 7.53 (t, 2H,  $J$  =

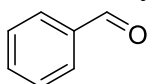

7.6 Hz), 7.61-7.64 (m, 1H), 7.88 (d, 2H,  $J$  = 6.9 Hz), 10.02 (s, 1H); <sup>13</sup>C  
NMR (CDCl<sub>3</sub>, 150 MHz)  $\delta$  = 128.9, 129.7, 134.4, 136.4, 192.3.

**3-Phenylpropionaldehyde (4b)<sup>8</sup>:** Colorless liquid; <sup>1</sup>H NMR (CDCl<sub>3</sub>, 600 MHz)  $\delta$  = 2.77

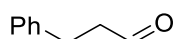

45.2, 126.3, 128.2, 128.6, 140.3, 201.5.

(t, 2H,  $J$  = 7.6 Hz), 2.95 (t, 2H,  $J$  = 7.6 Hz), 7.18-7.21 (m, 3H), 7.28 (t,  
2H,  $J$  = 7.6 Hz), 9.81 (s, 1H); <sup>13</sup>C NMR (CDCl<sub>3</sub>, 150 MHz)  $\delta$  = 28.1,

**(E)-2-Benzylidene-3,4-dihydronaphthalen-1(2H)-one (5)<sup>9</sup>:** Colorless solid; <sup>1</sup>H NMR

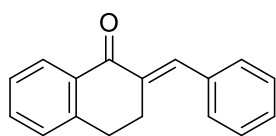

127.0, 128.17, 128.22, 128.4, 128.5, 129.9, 133.3, 133.5, 135.5, 135.8, 136.6, 143.2,  
187.9.

(CDCl<sub>3</sub>, 600 MHz)  $\delta$  = 2.94 (t, 2H,  $J$  = 6.5 Hz), 3.12 (td, 2H,  $J$  =  
6.5, 2.1 Hz), 7.24 (d, 1H,  $J$  = 6.9 Hz), 7.33-7.36 (m, 2H), 7.39-  
7.44 (m, 4H), 7.48 (td, 1H,  $J$  = 7.6, 1.4 Hz), 7.86 (s, 1H), 8.12 (dd,  
1H,  $J$  = 8.3, 1.4 Hz); <sup>13</sup>C NMR (CDCl<sub>3</sub>, 150 MHz)  $\delta$  = 27.2, 28.9,

**4-Phenyl-3,4,5,6-tetrahydrobenzo[h]quinazoline-2(1H)-thione (6)<sup>10</sup>:** White solid; <sup>1</sup>H-

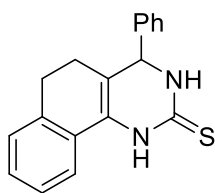

127.6, 127.7, 127.8, 127.9, 128.7, 135.4, 142.9, 174.3.

NMR (DMSO-*d*<sub>6</sub>, 600 MHz)  $\delta$  = 1.80-1.86 (m, 1H), 2.15-2.20 (m, 1H),  
2.54-2.60 (m, 1H), 2.68-2.74 (m, 1H), 4.94 (s, 1H), 7.15 (d, 1H,  $J$  =  
6.9 Hz), 7.18-7.22 (m, 2H), 7.29-7.31 (m, 3H), 7.37 (t, 2H,  $J$  = 7.6 Hz),  
7.67 (d, 1H,  $J$  = 6.8 Hz), 9.06 (s, 1H), 9.73 (s, 1H); <sup>13</sup>C NMR (DMSO-  
*d*<sub>6</sub>, 150 MHz)  $\delta$  = 23.6, 27.3, 58.5, 111.2, 122.7, 126.3, 126.6, 127.0,

## 8. STEM analysis

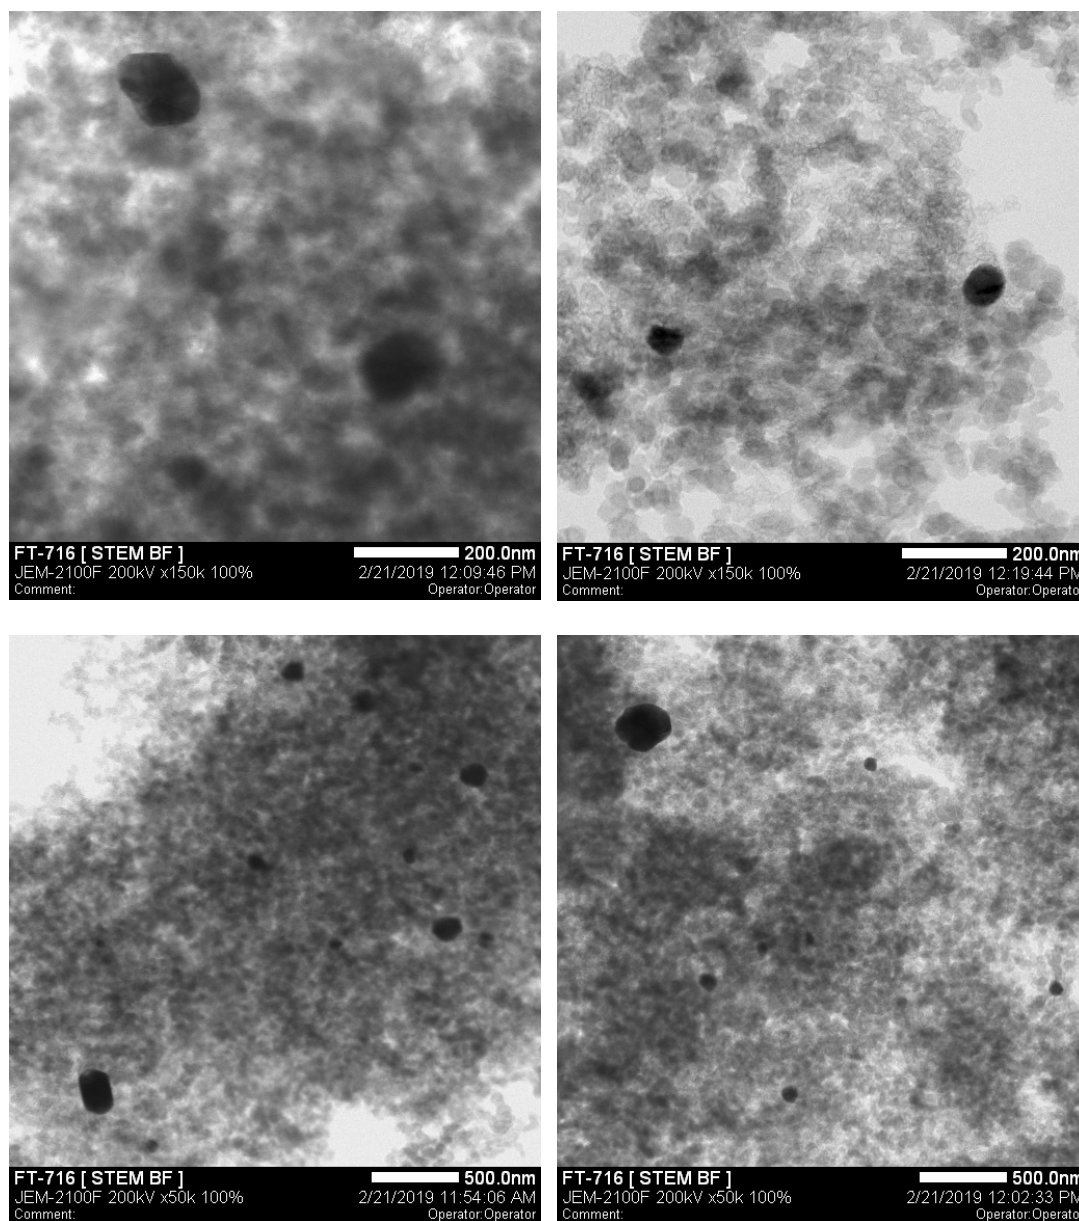

**Figure S3** STEM analysis of NCI-Cu-500 (0.500)

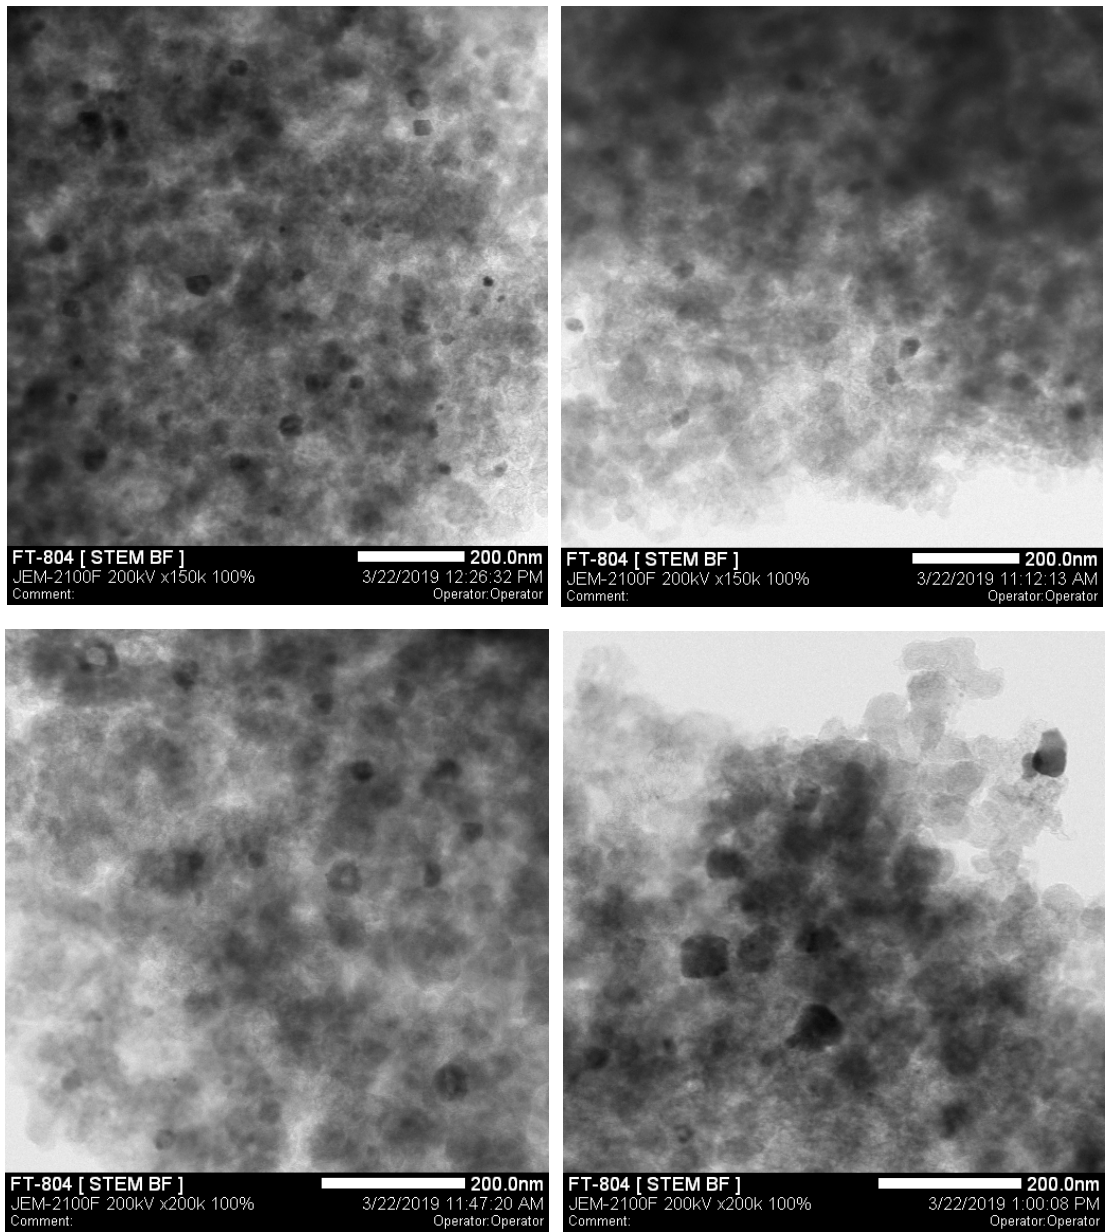

**Figure S4** STEM analysis of Cu/C-500

## 9. NMR charts

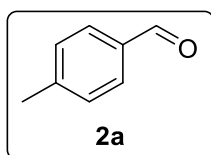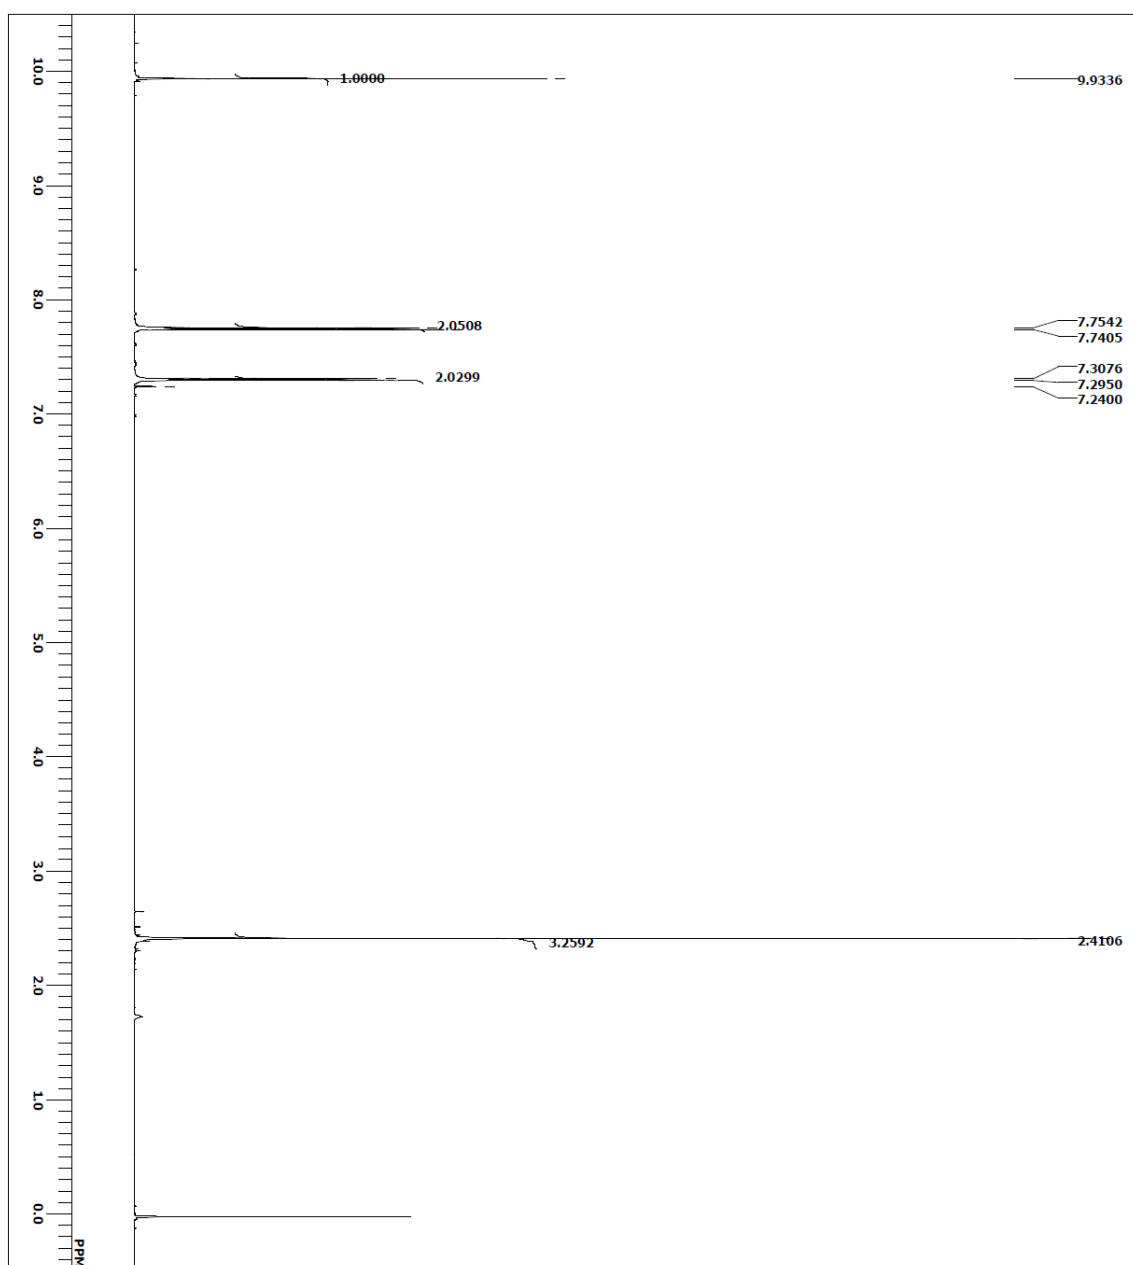



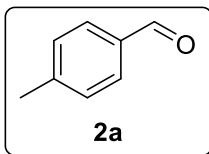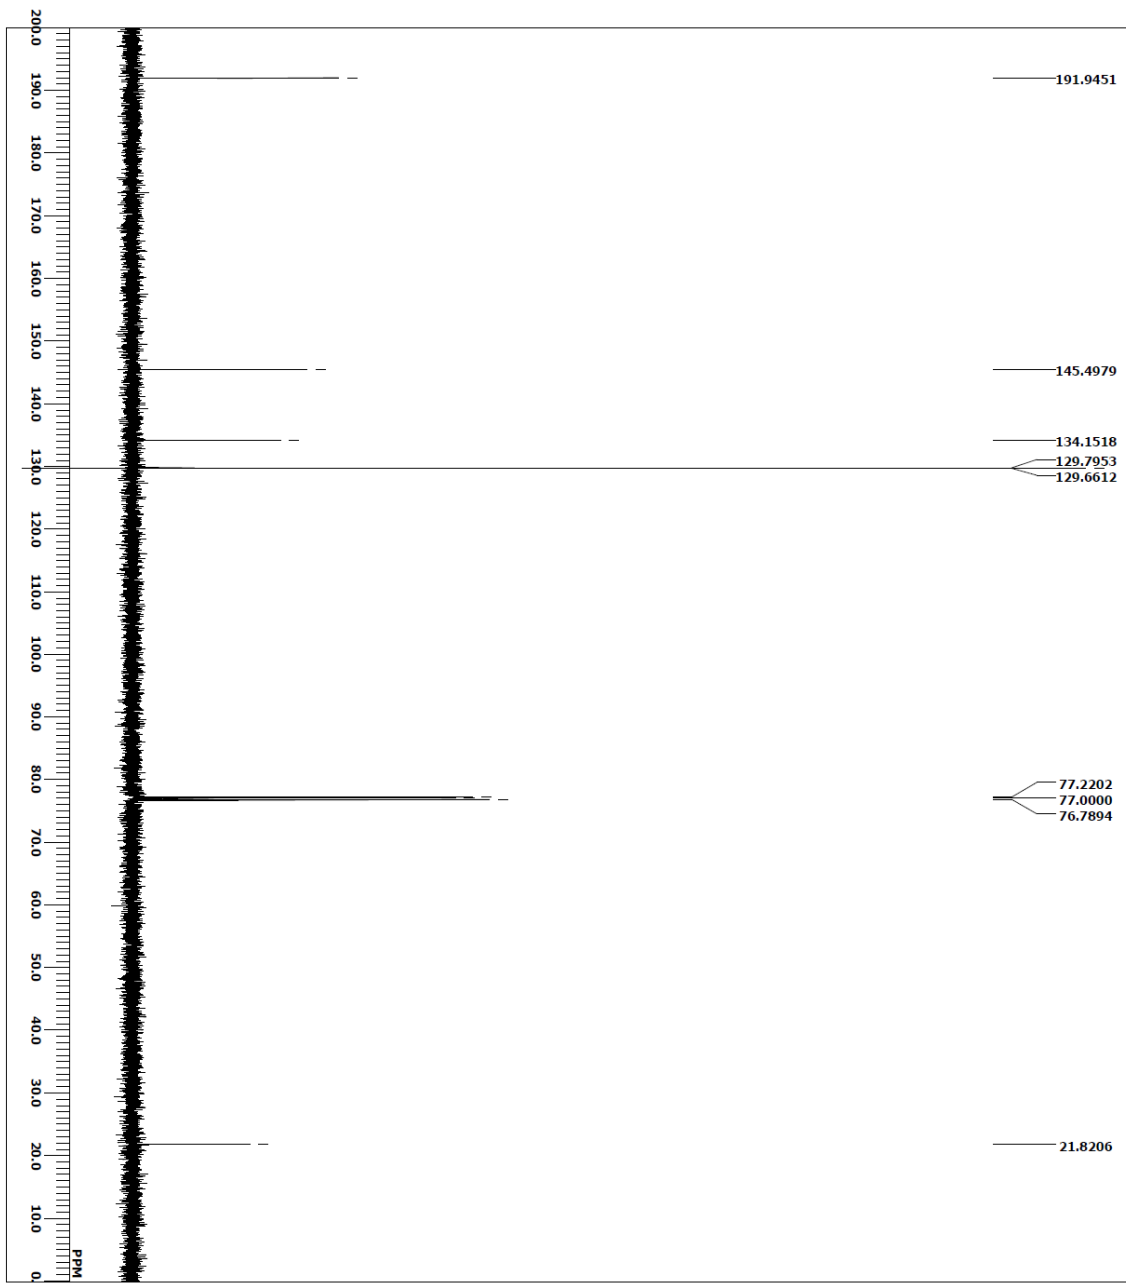

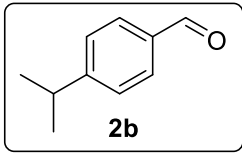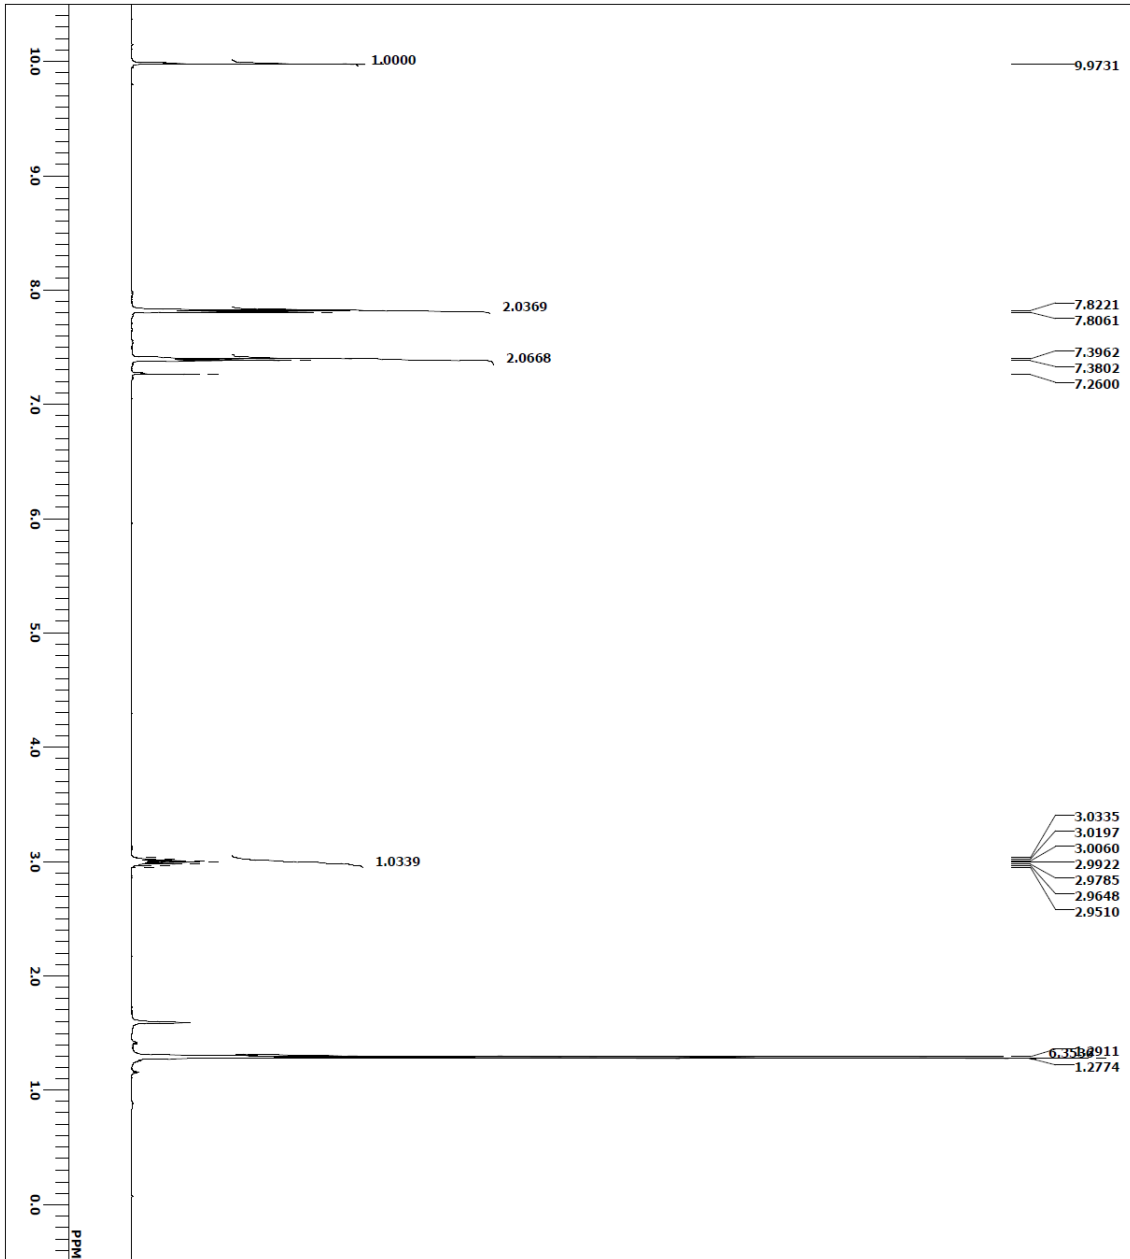

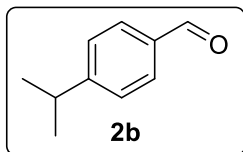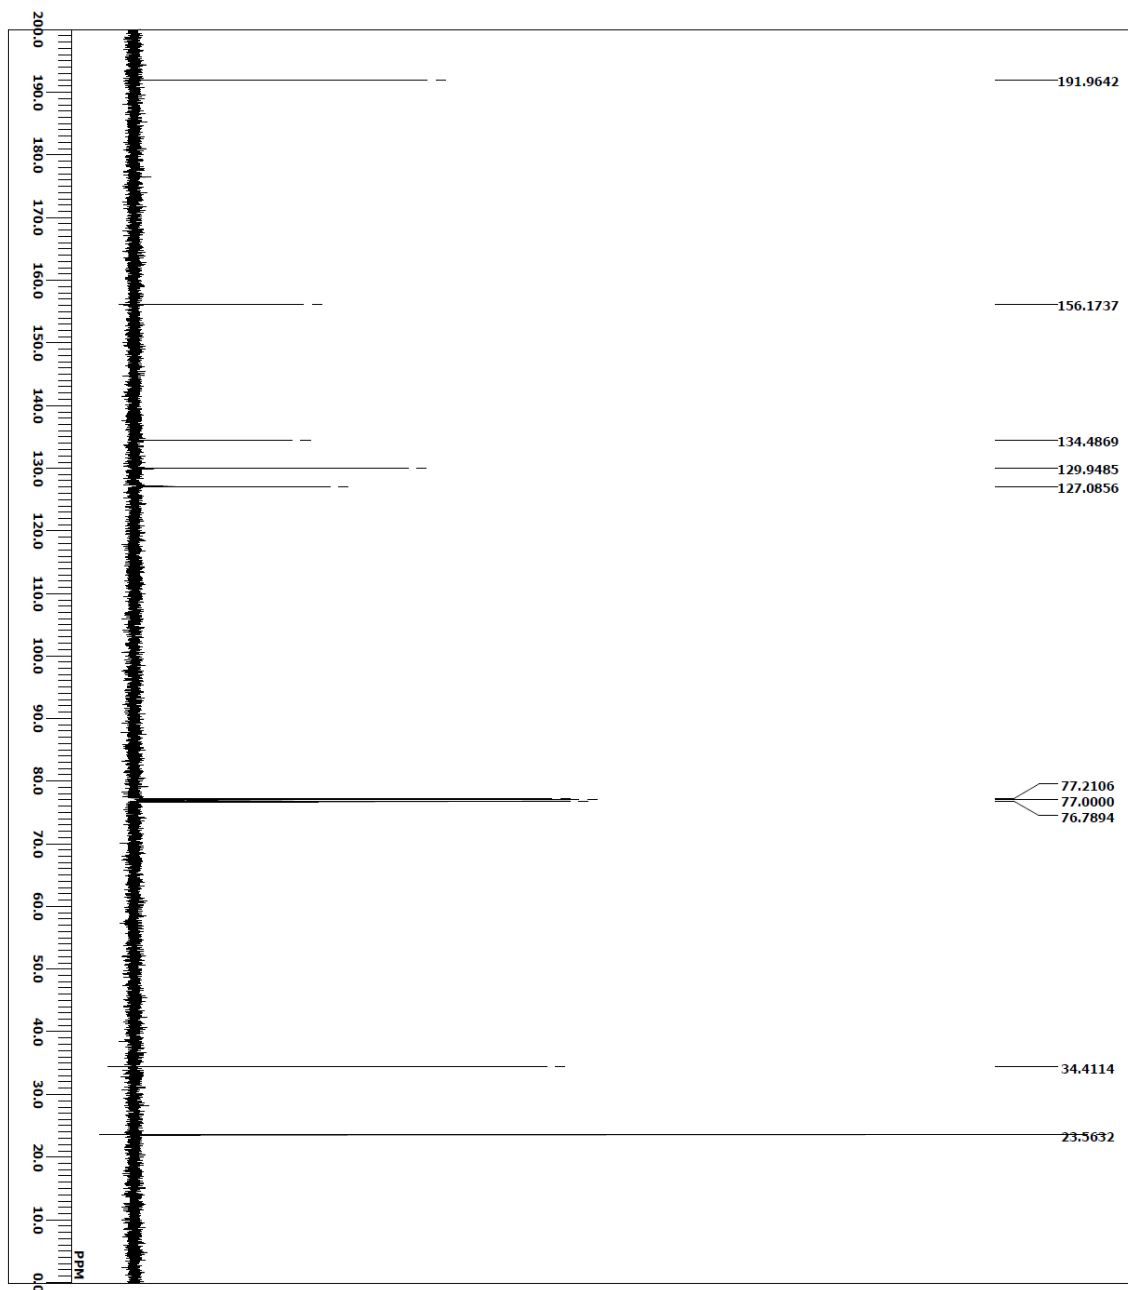

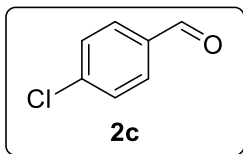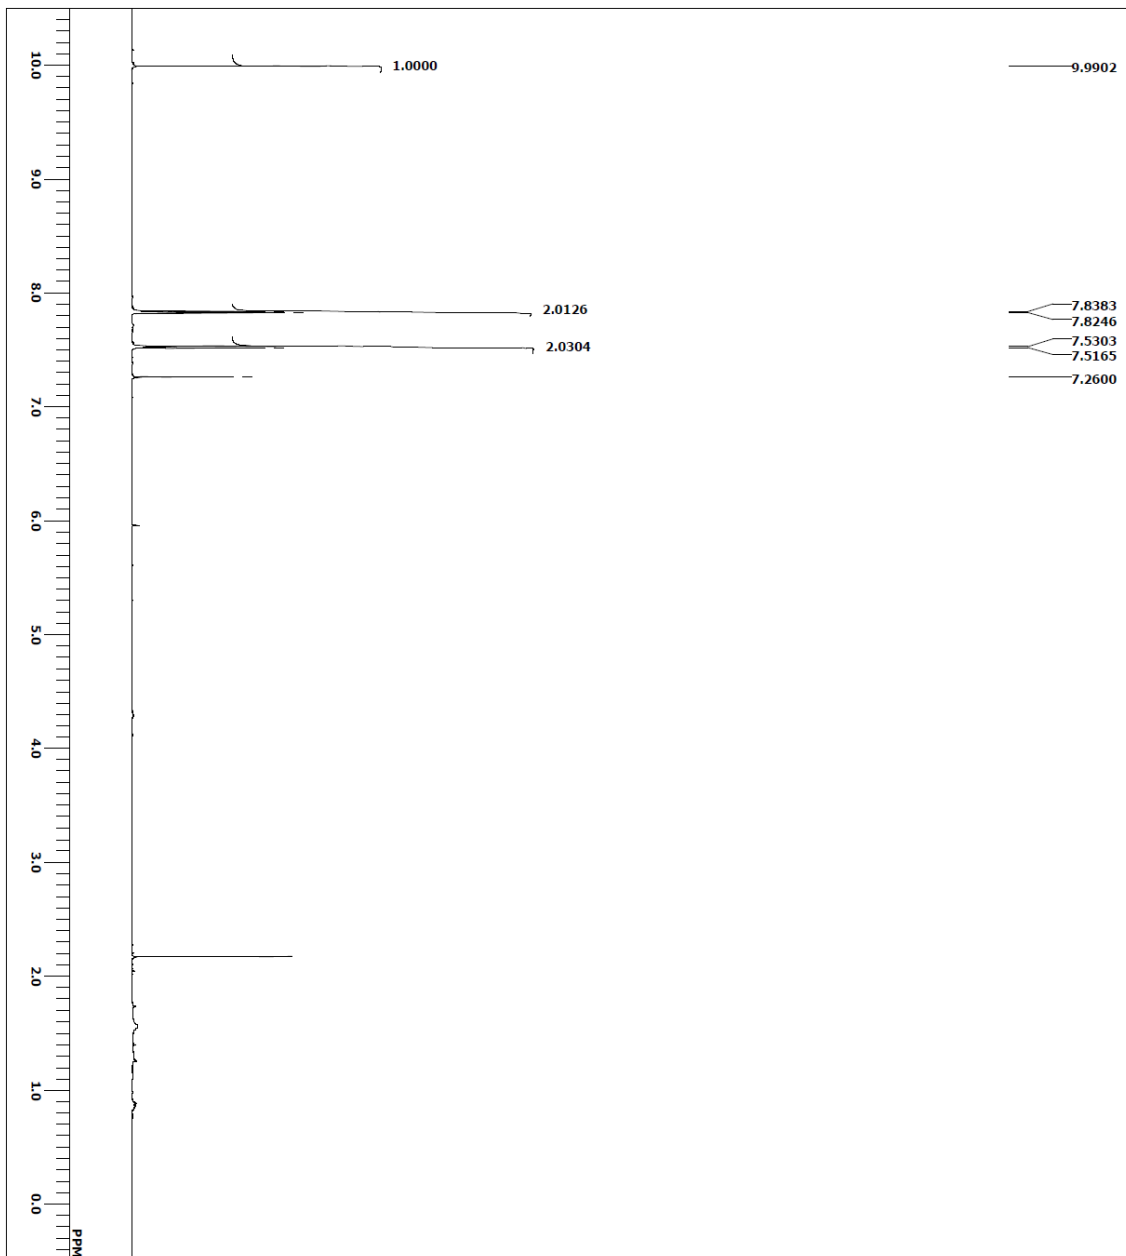

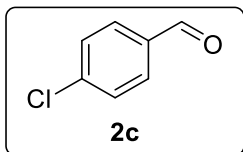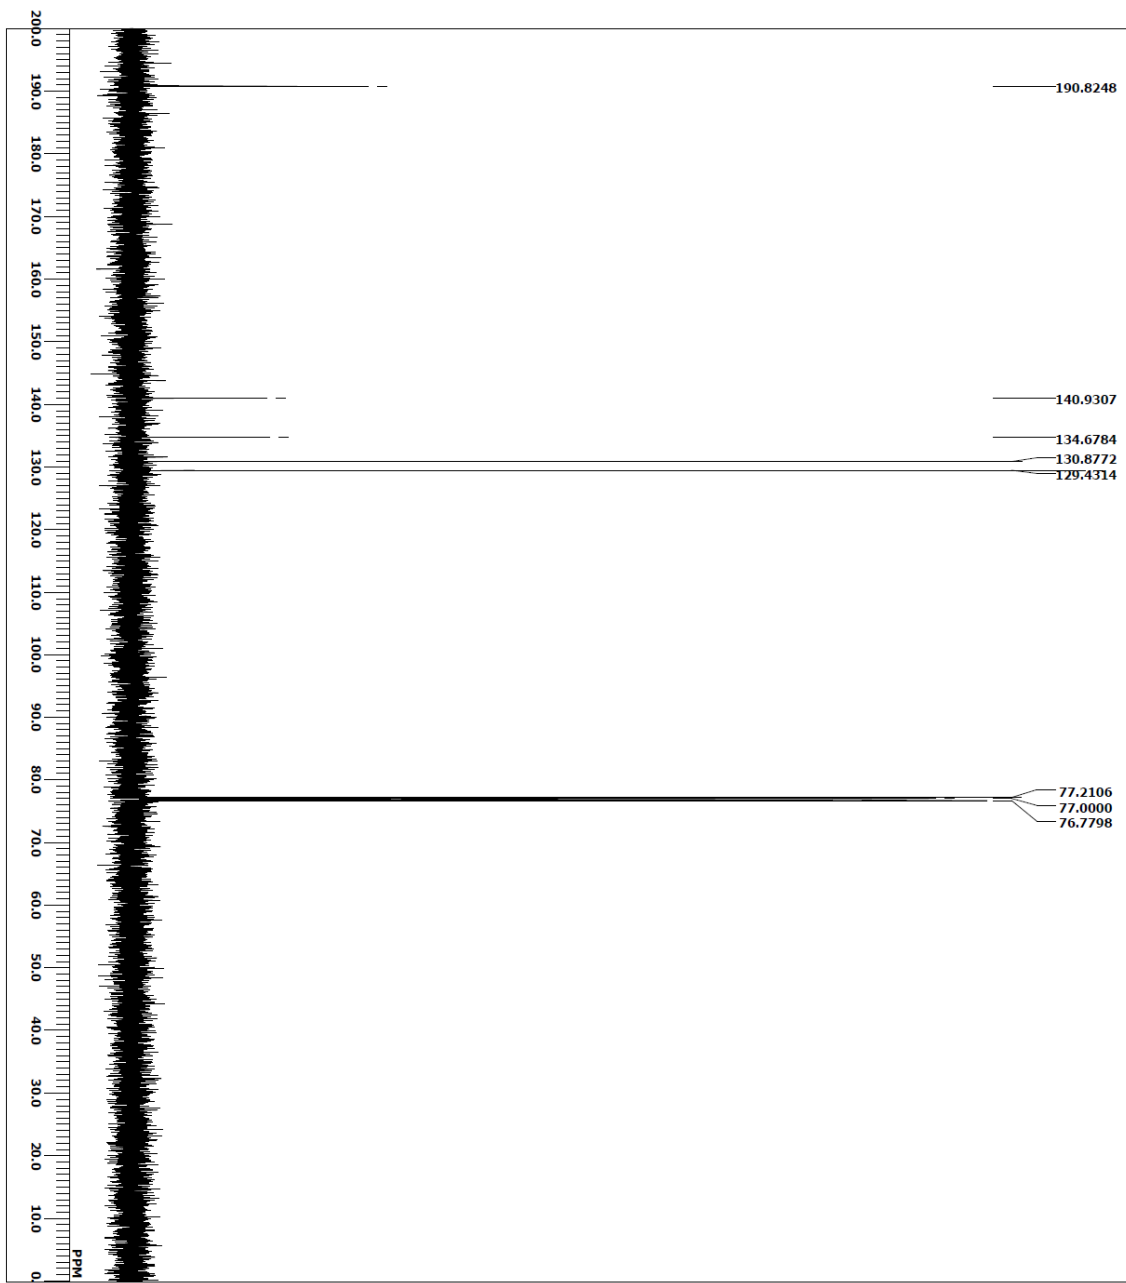

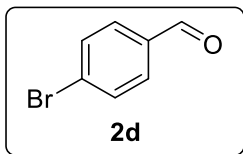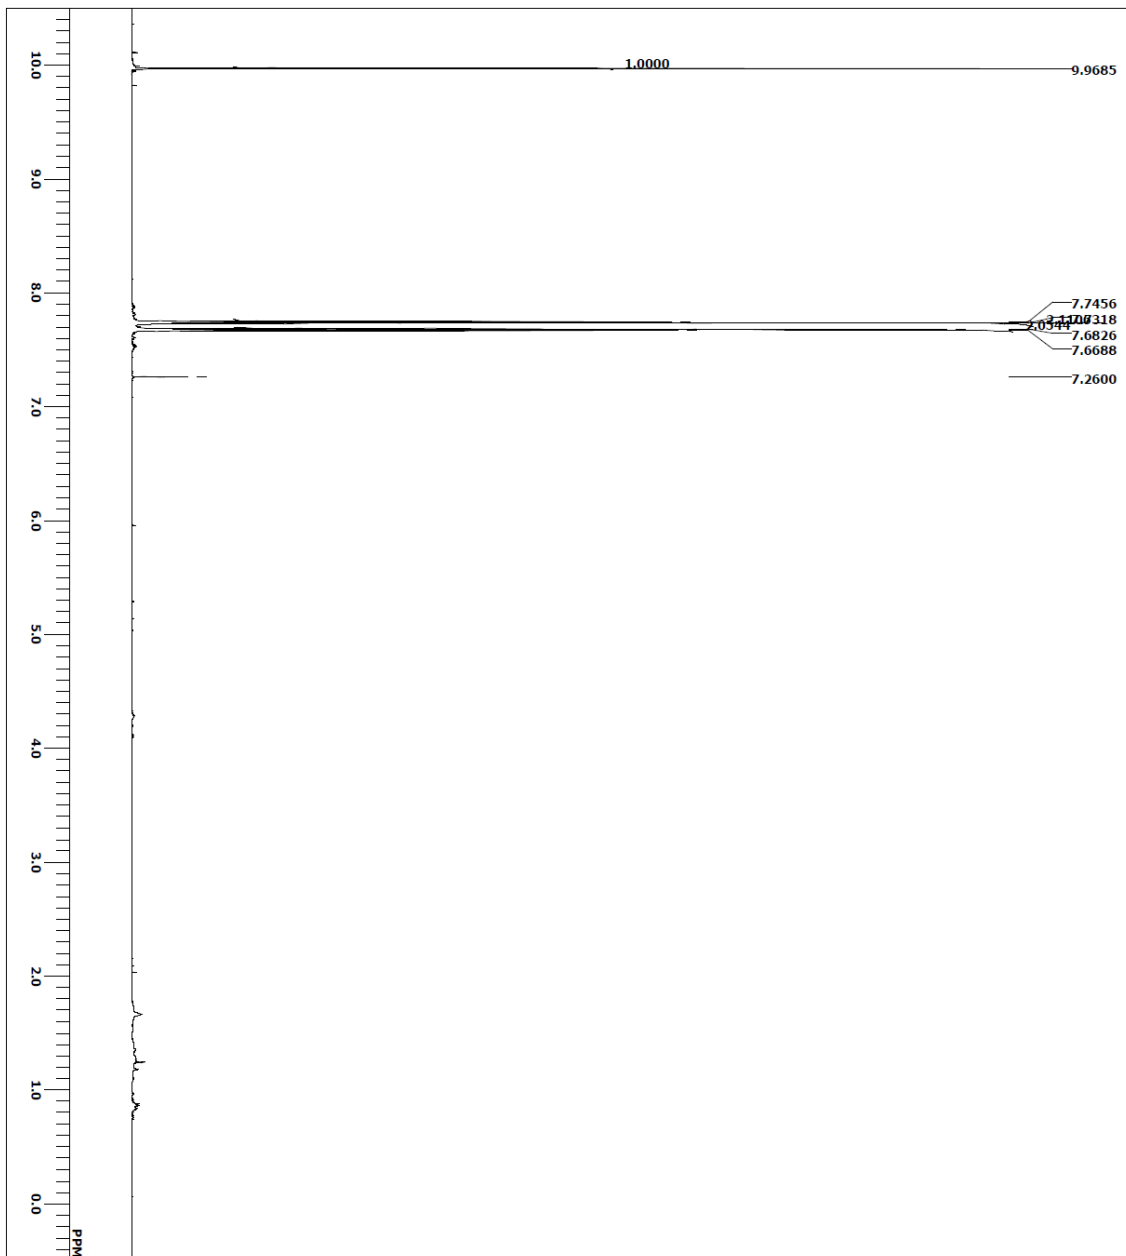

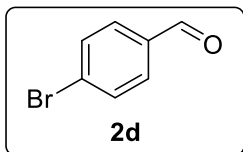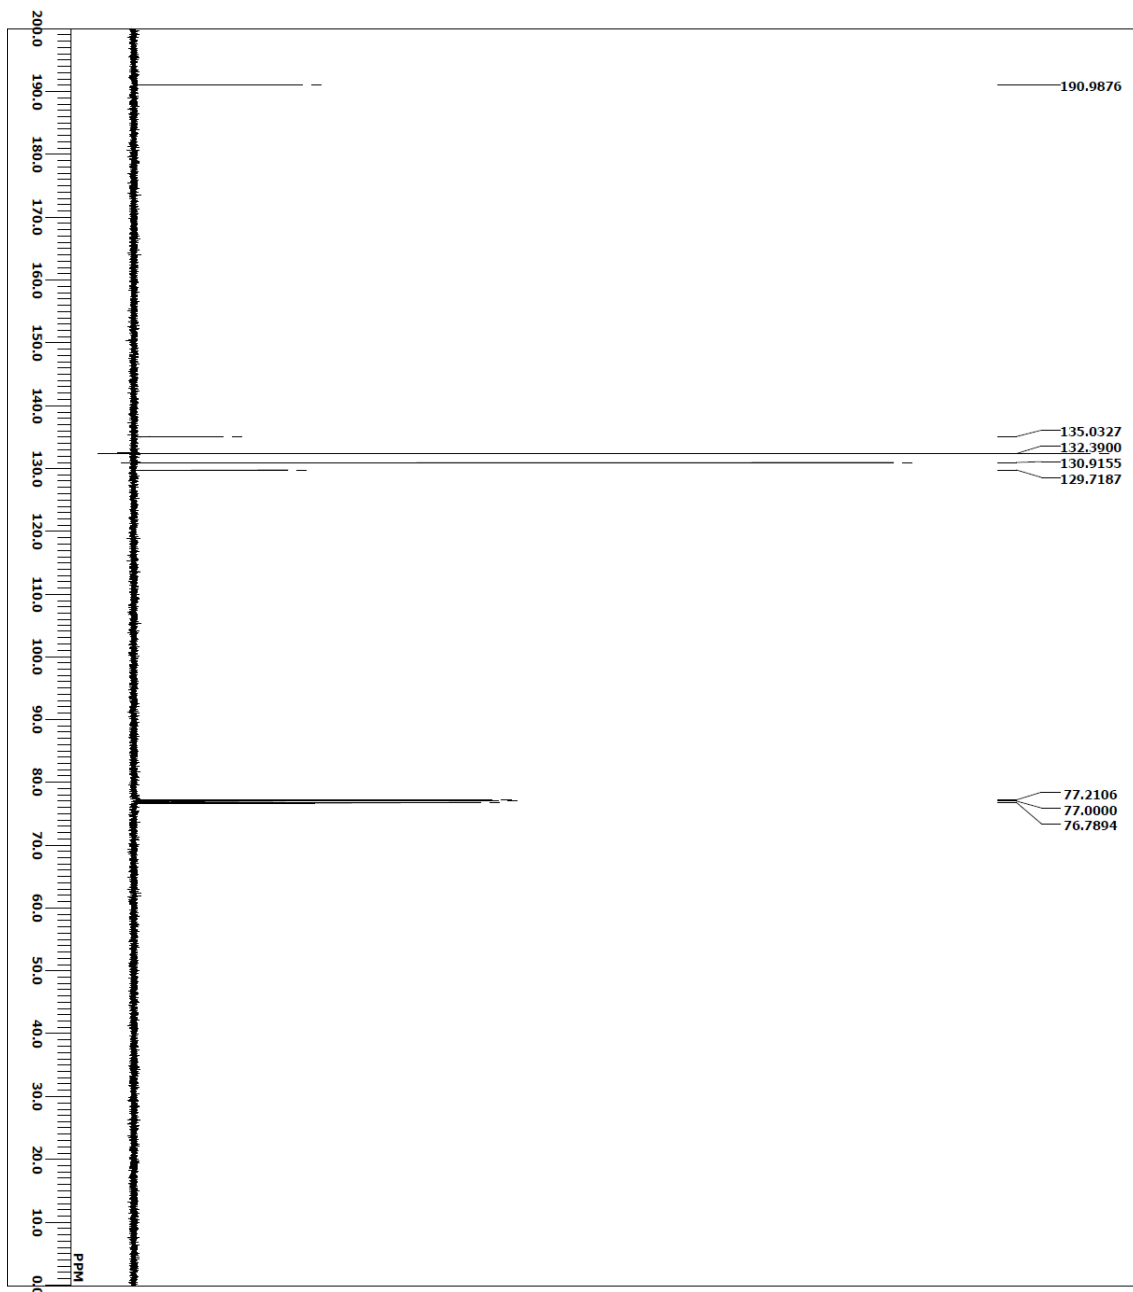

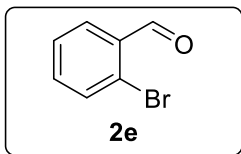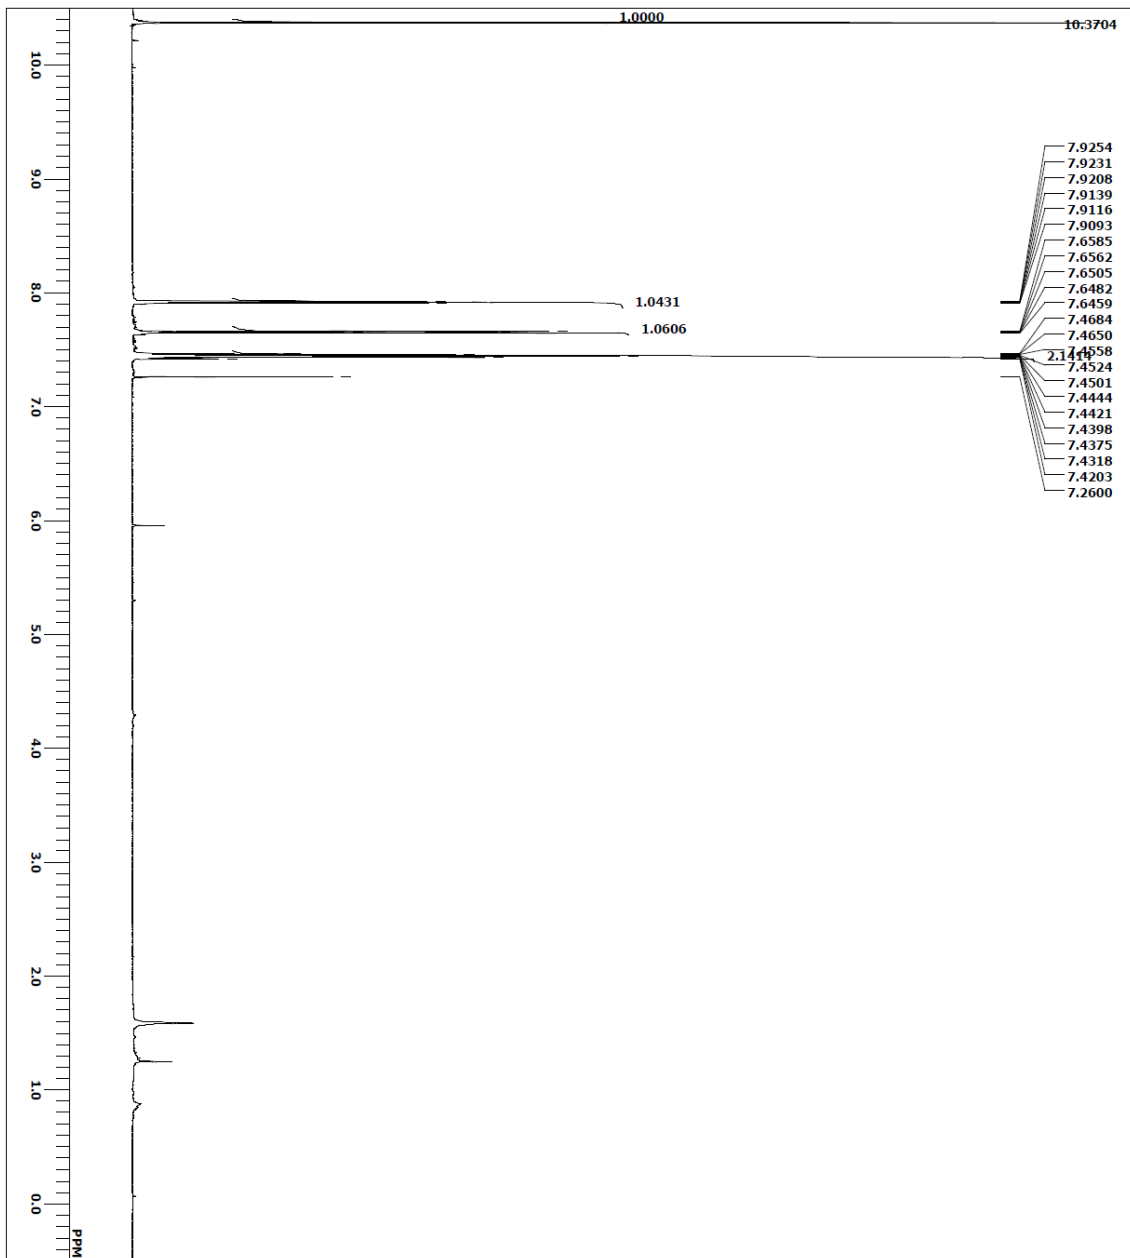



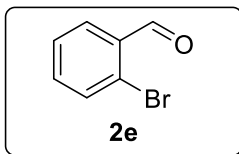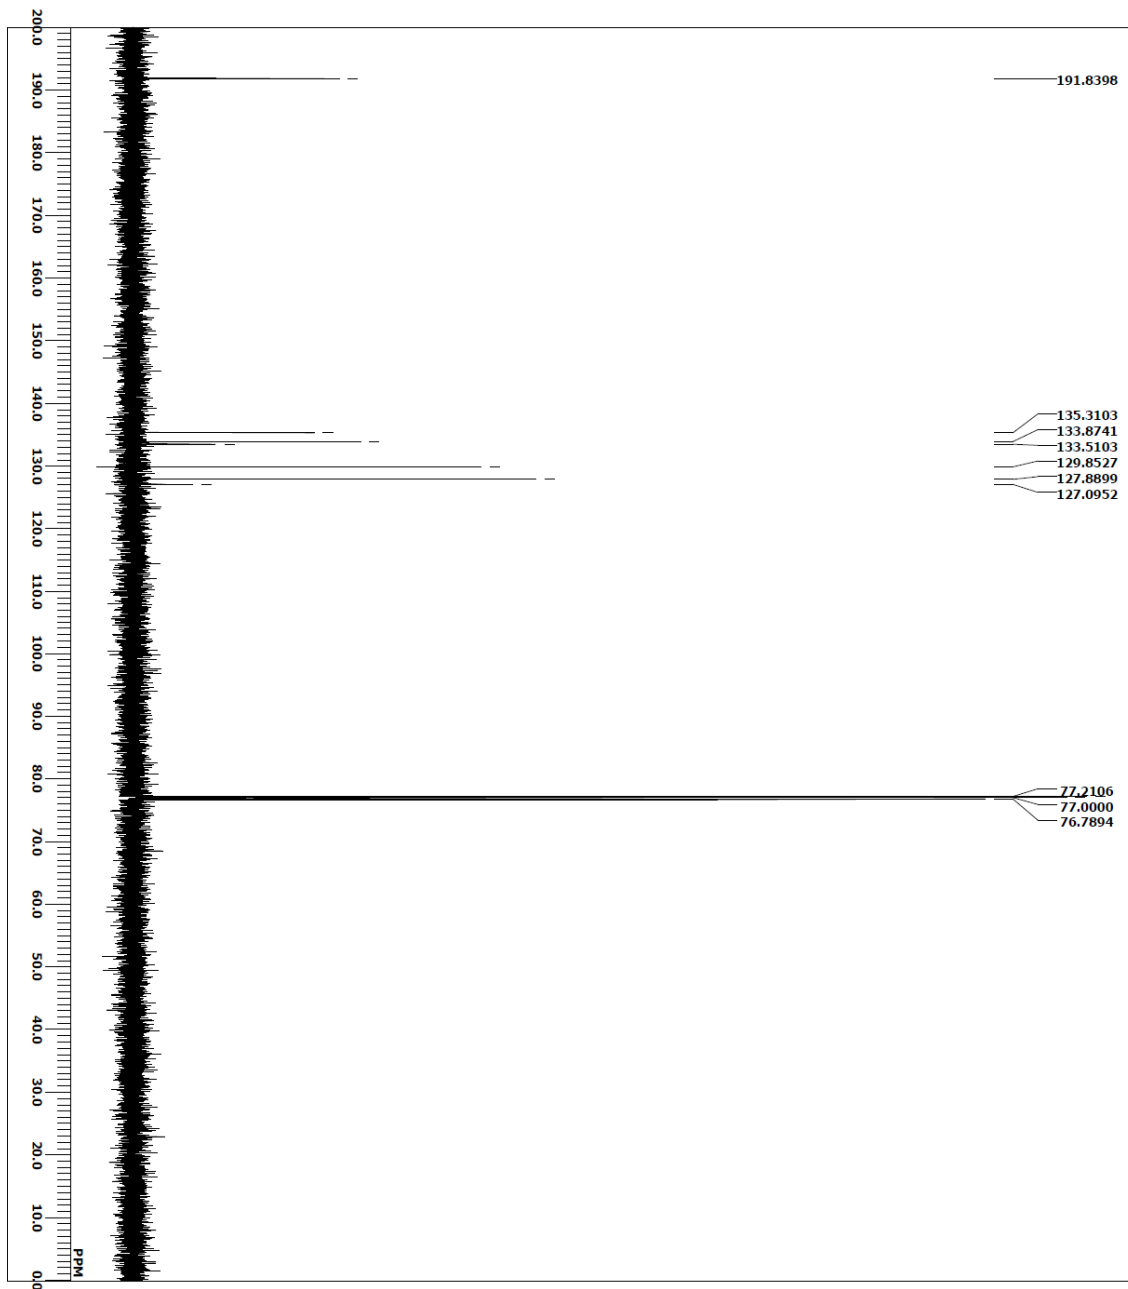

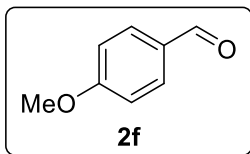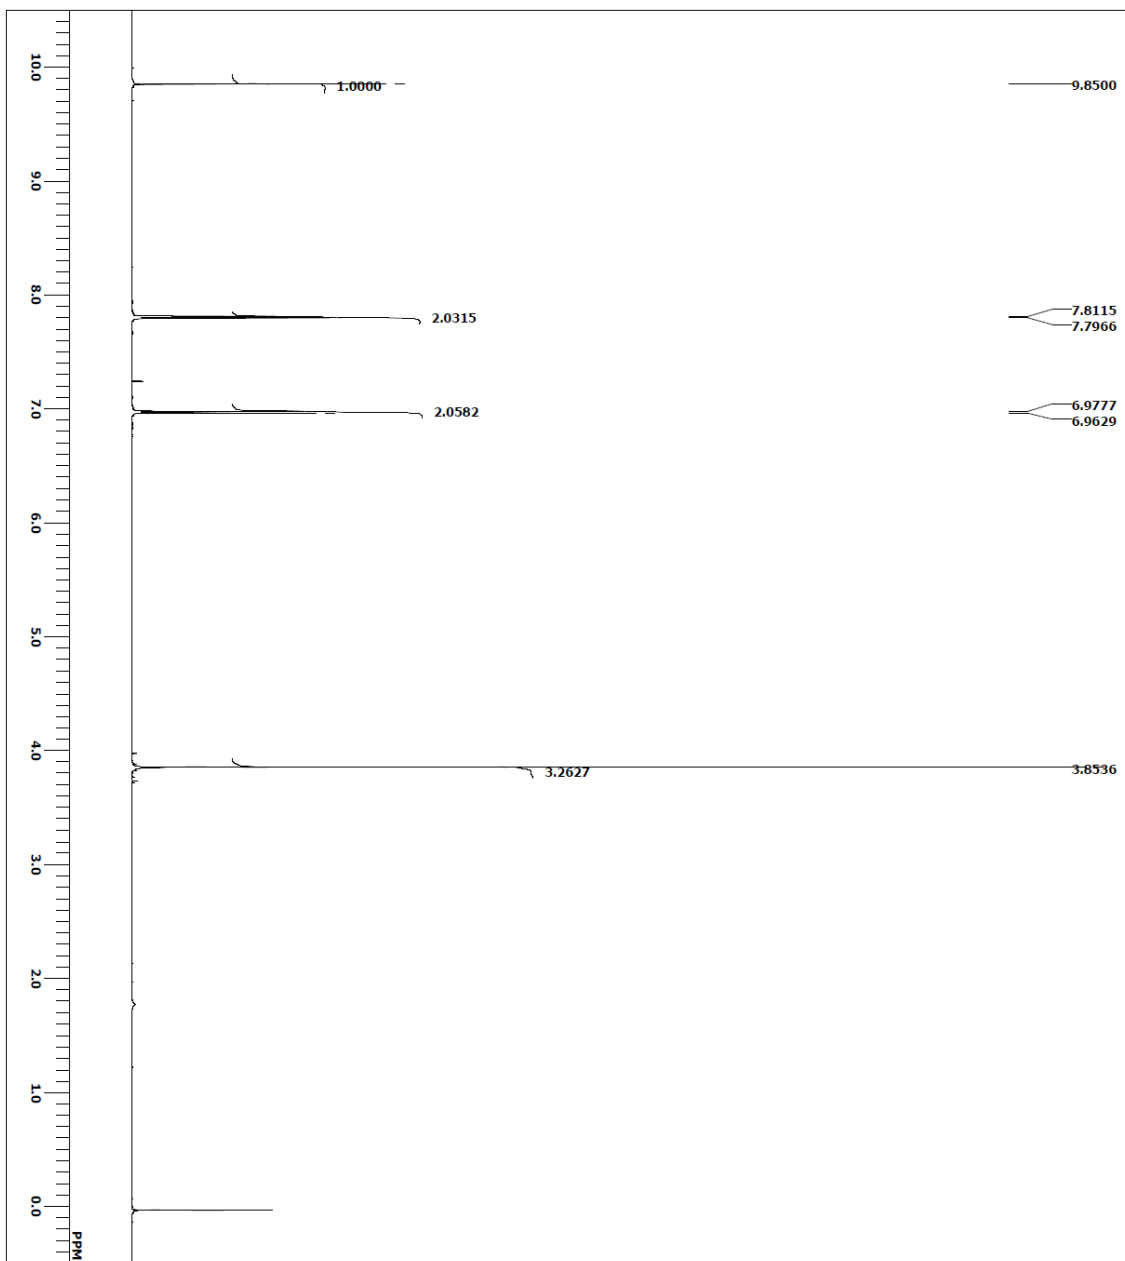

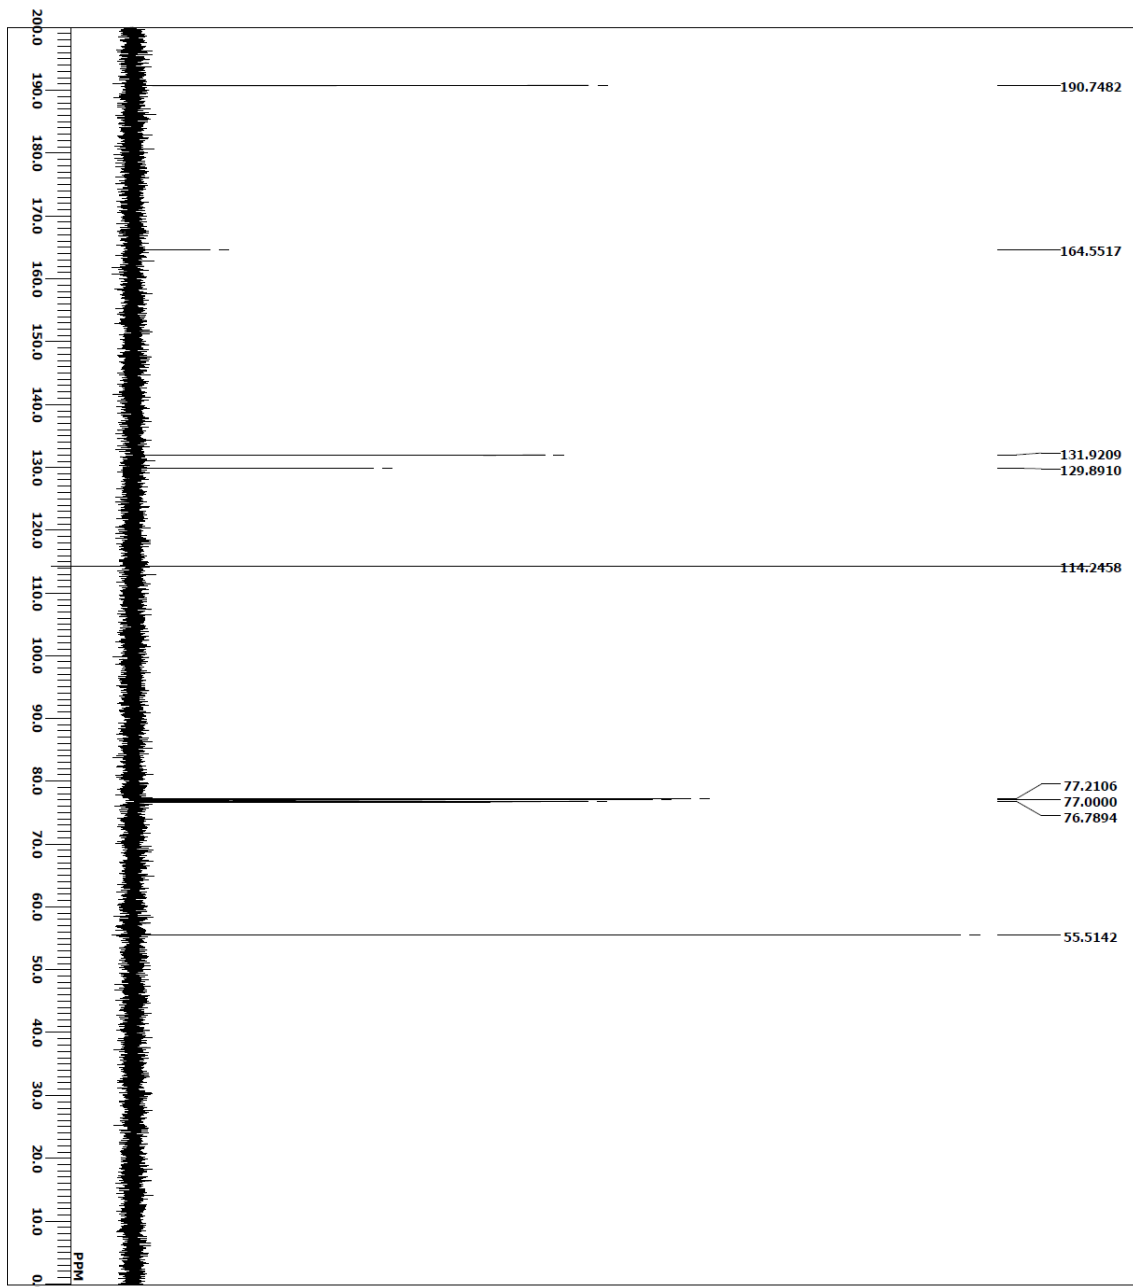

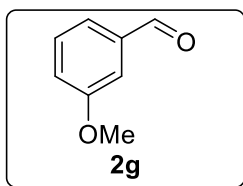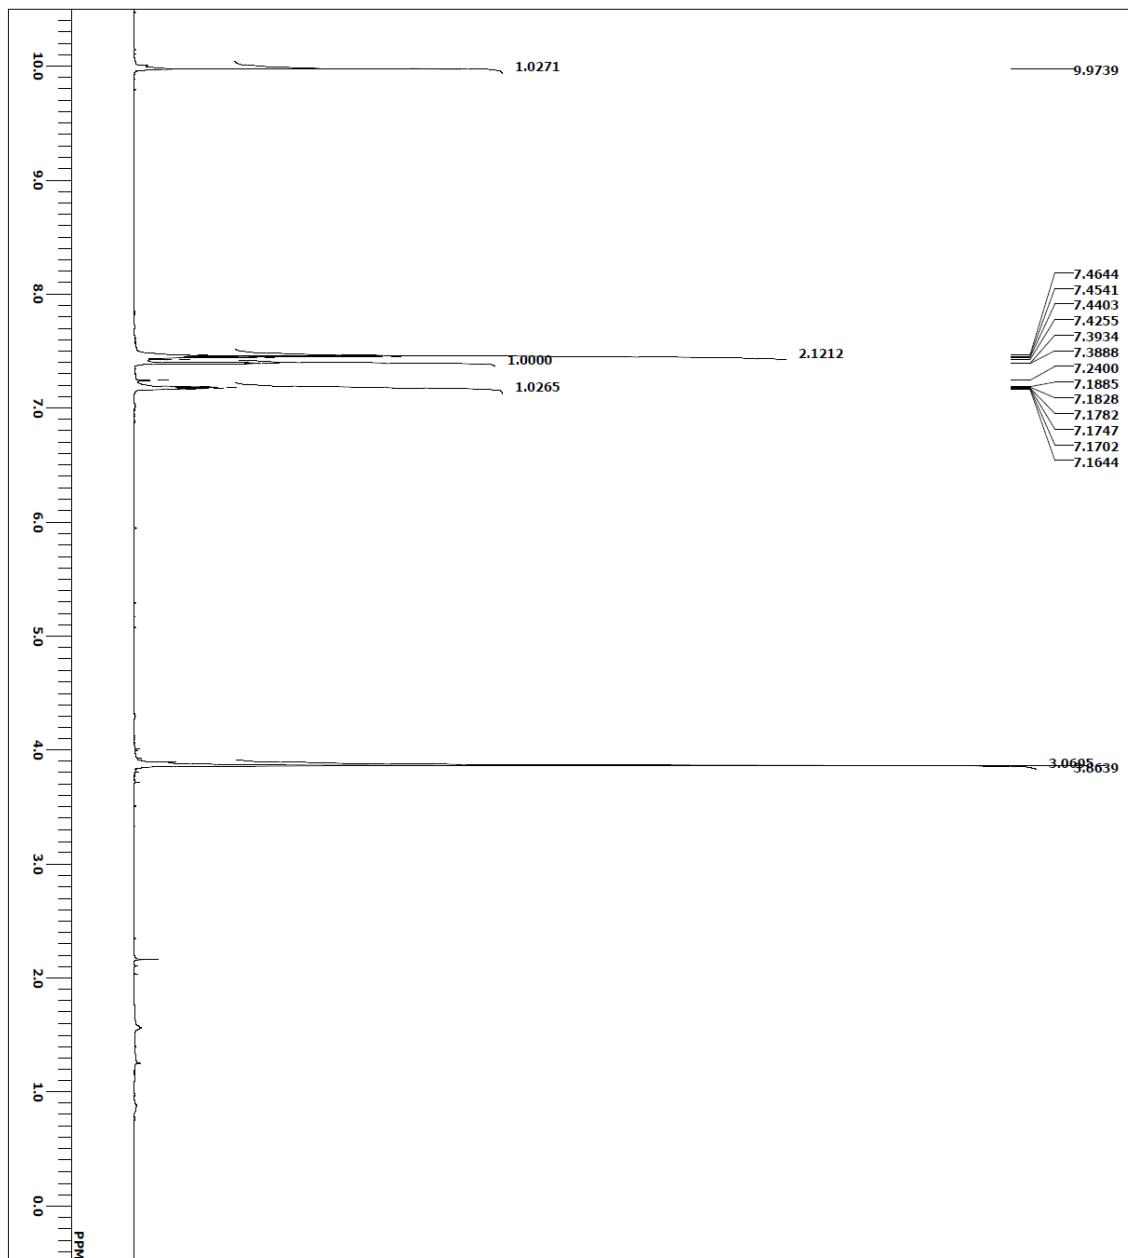

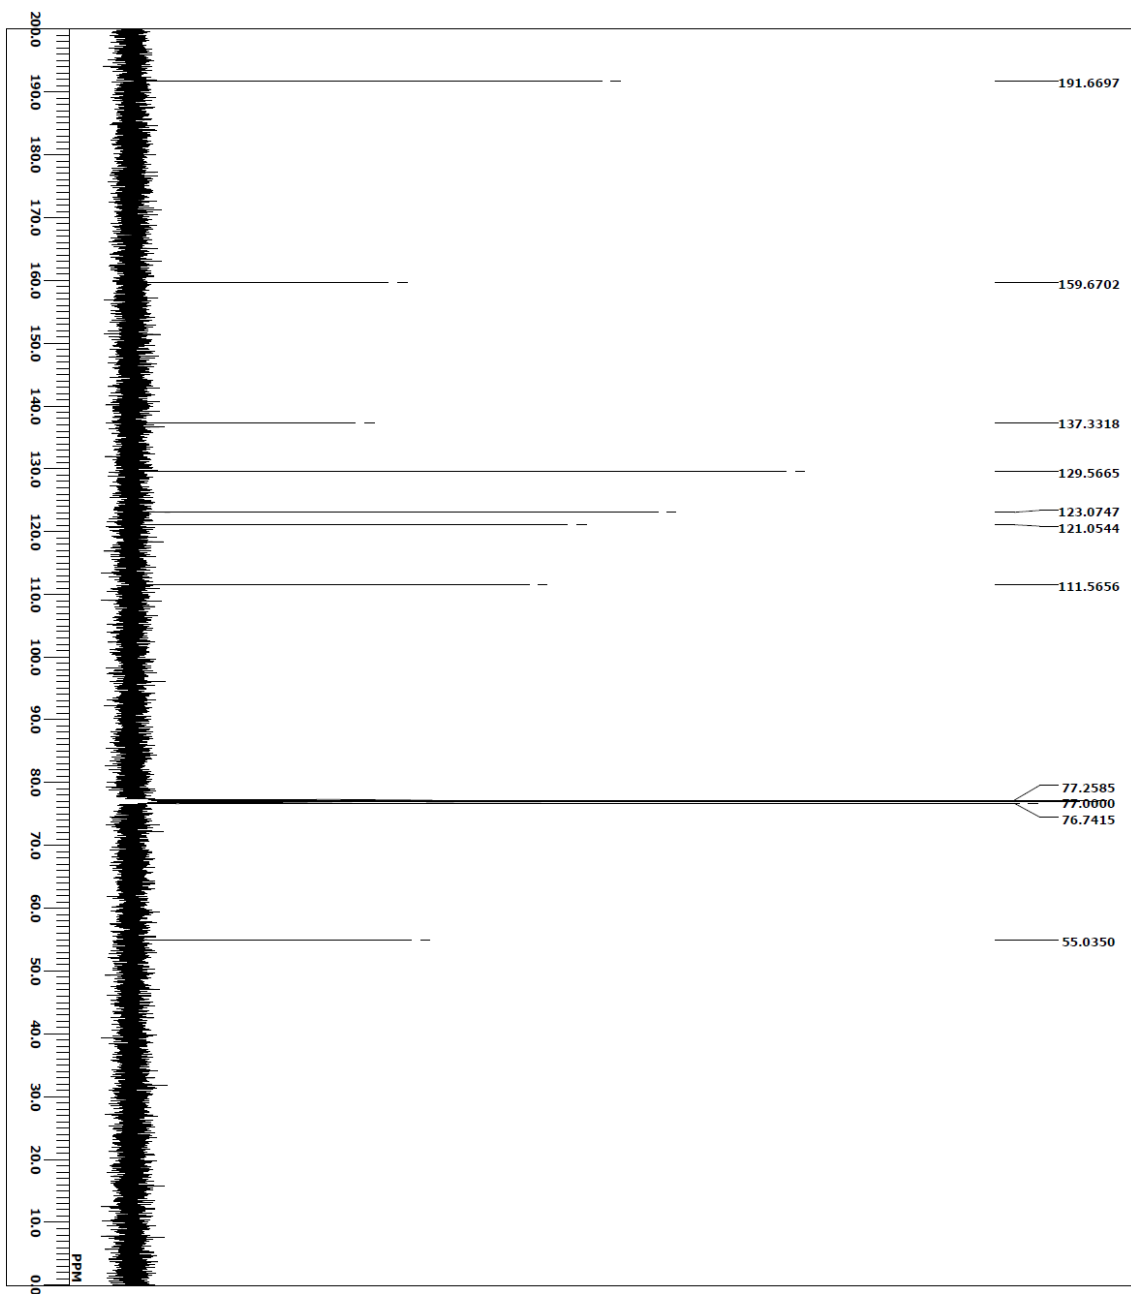

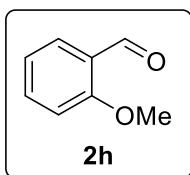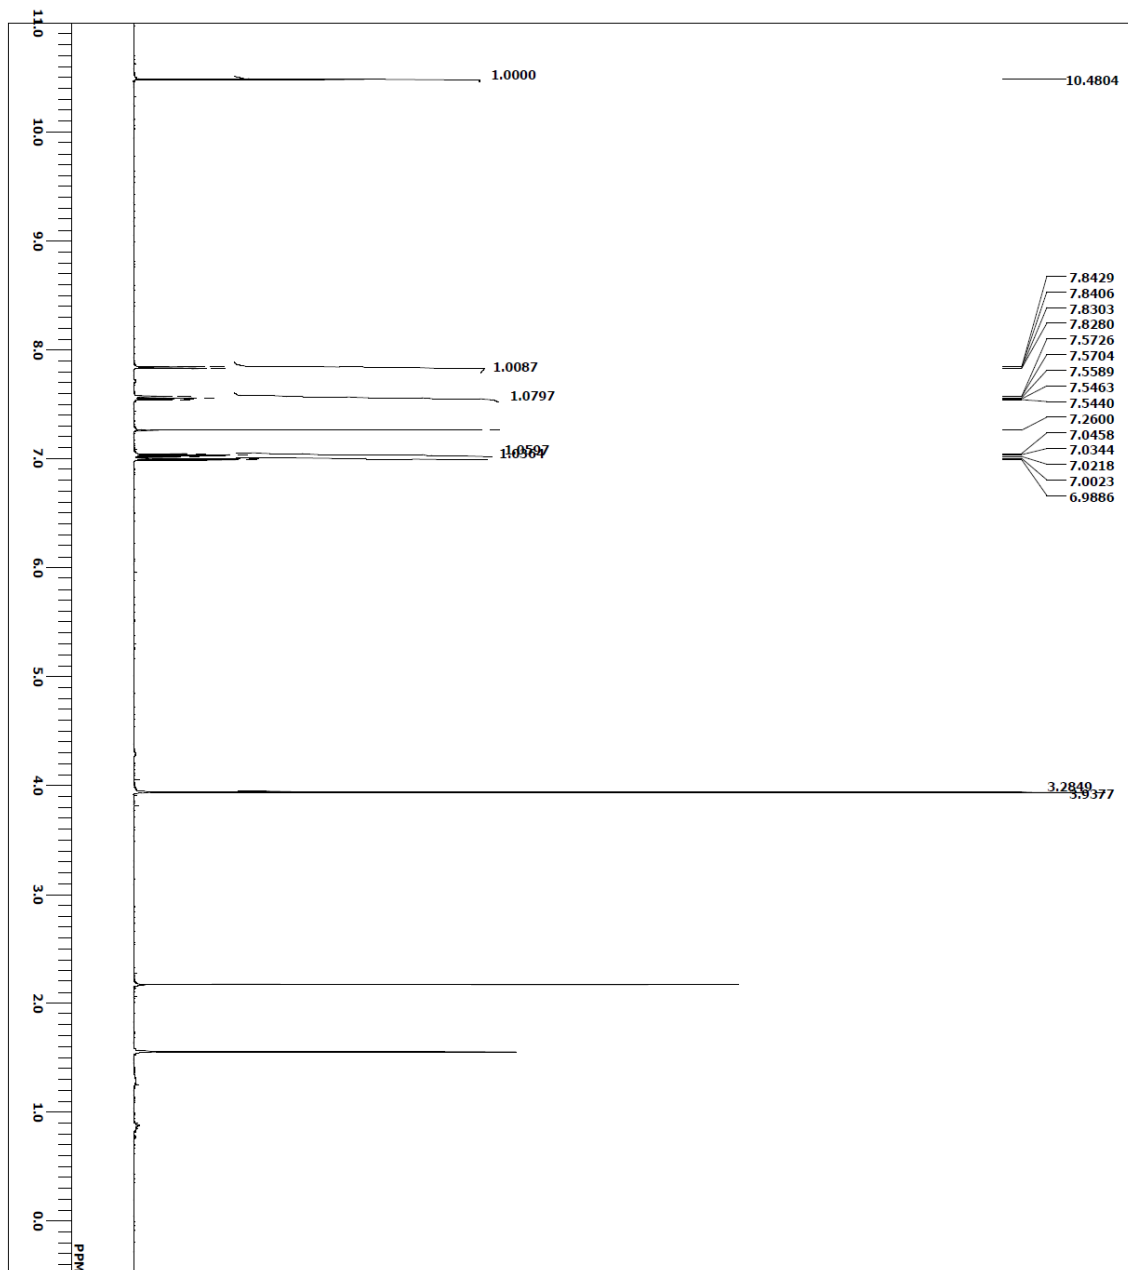

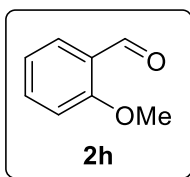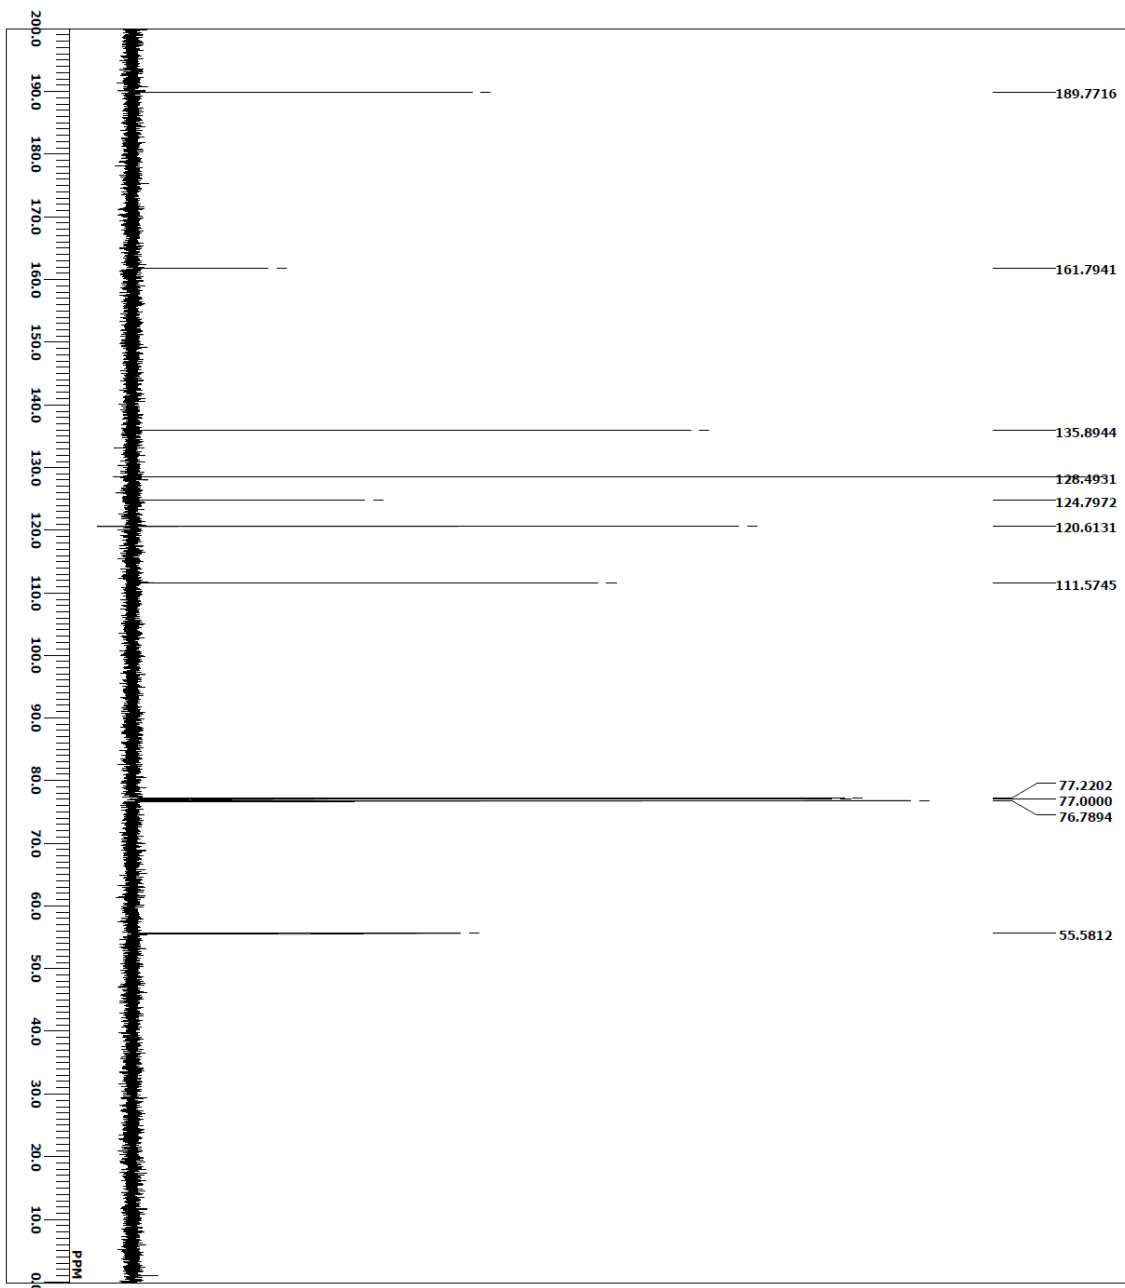

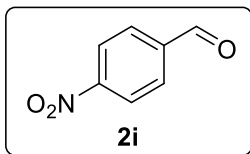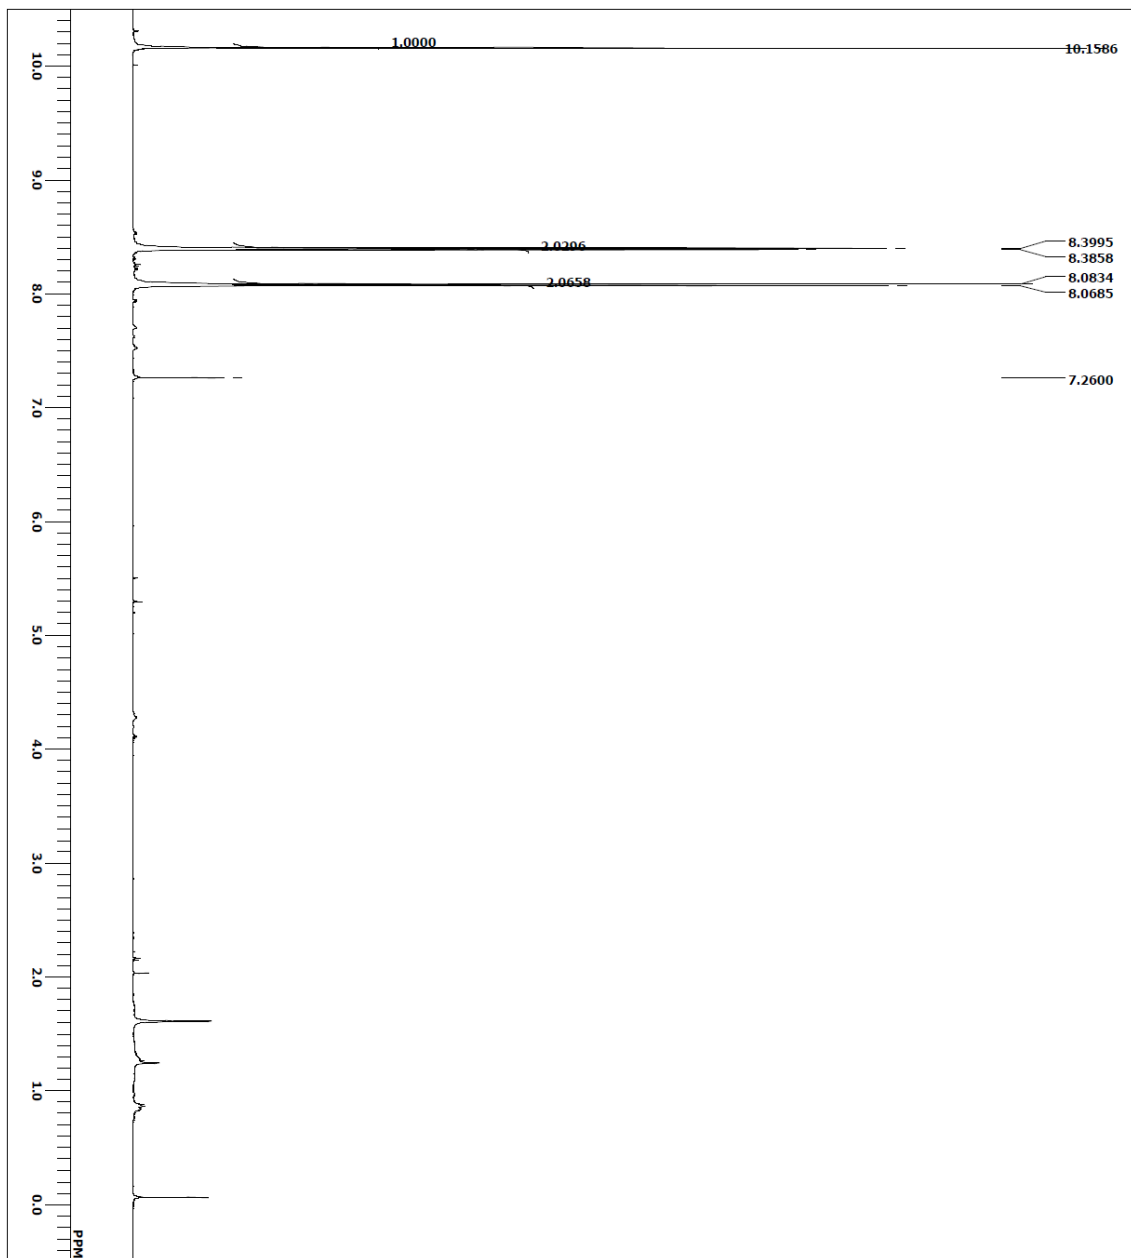



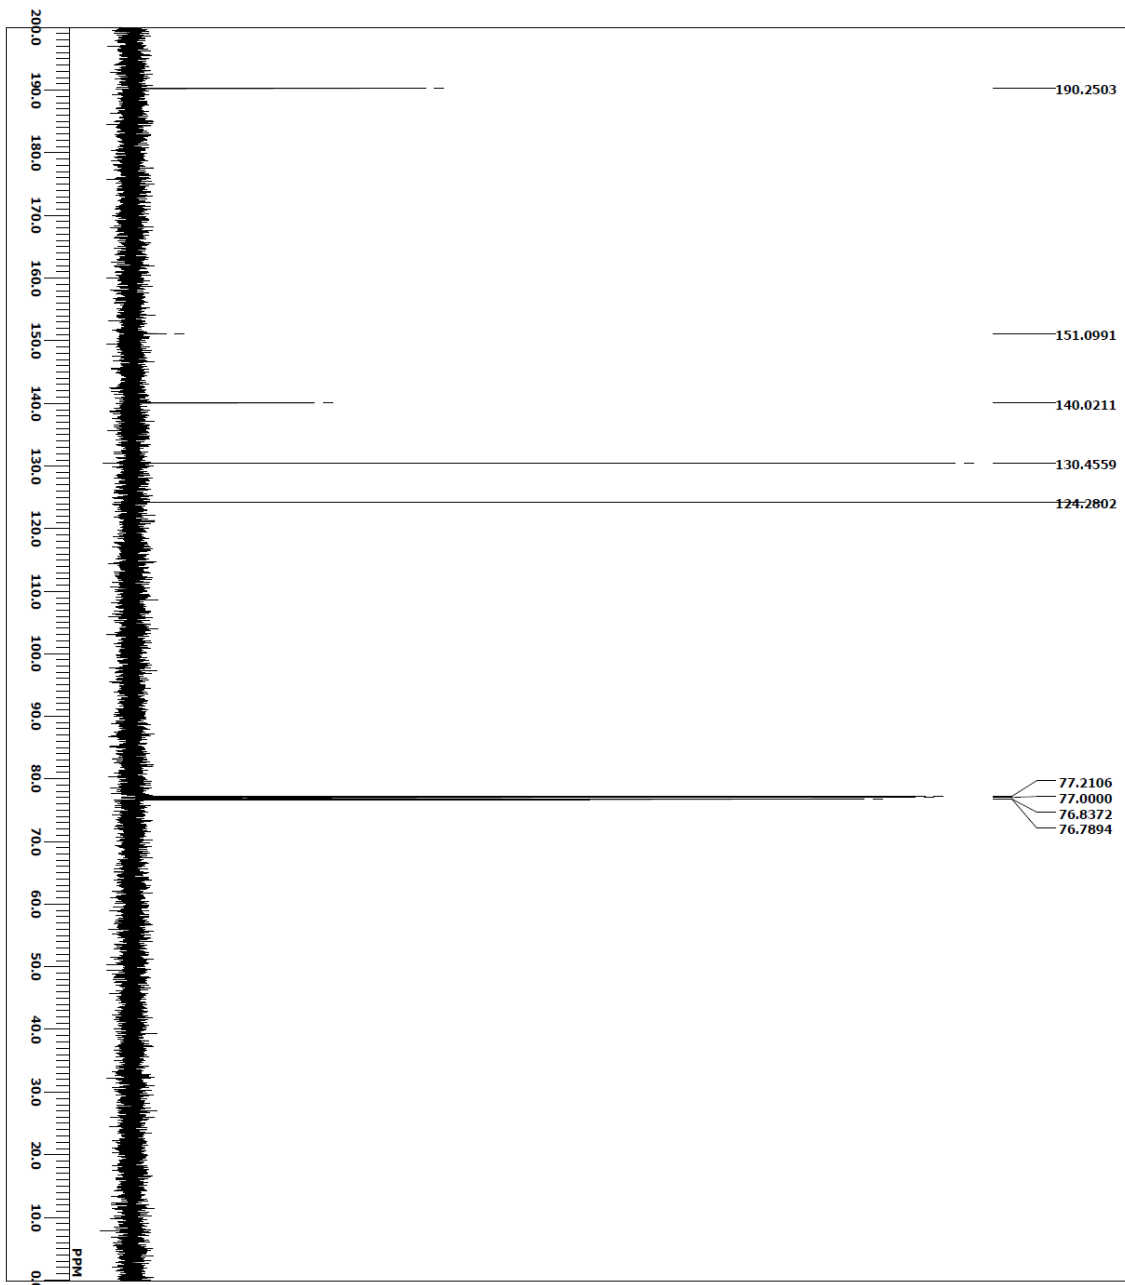

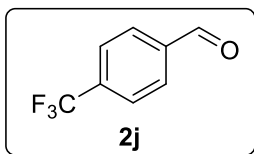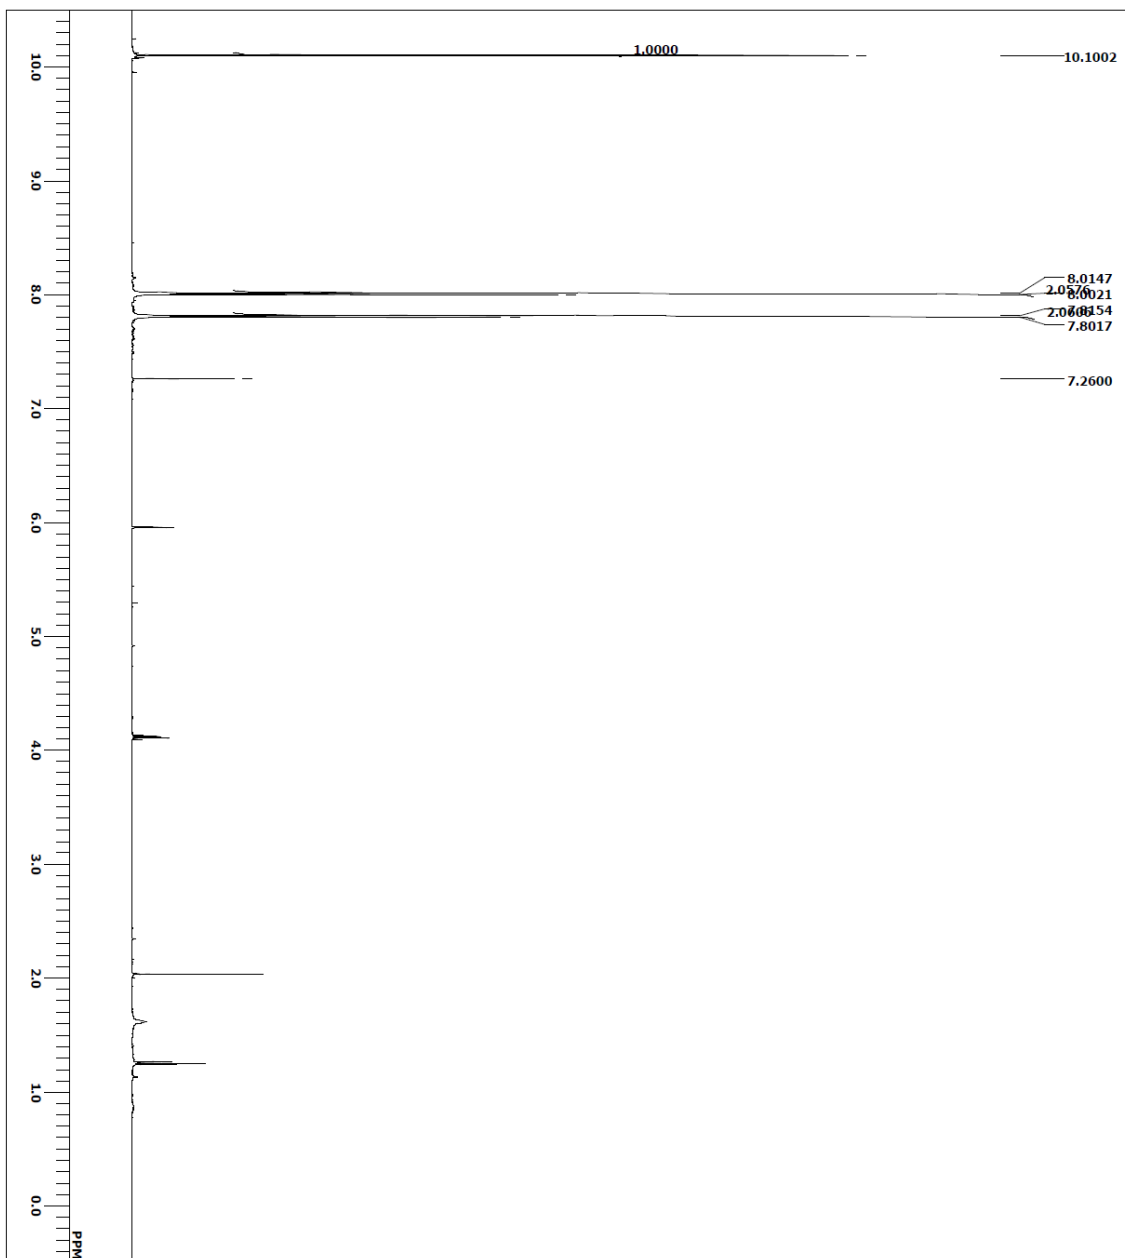

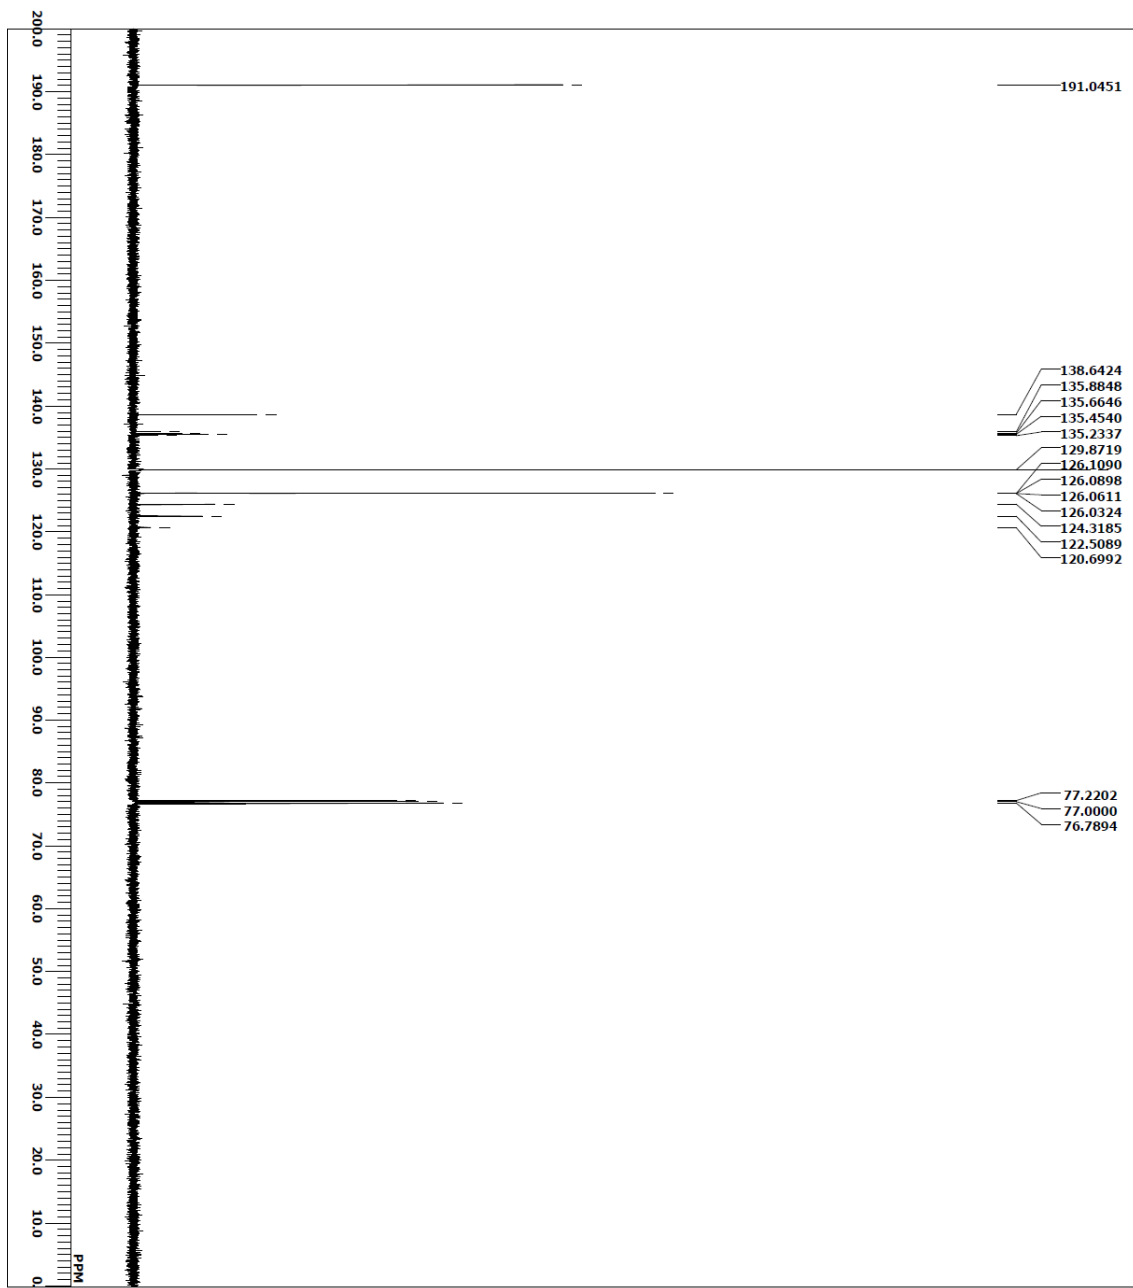

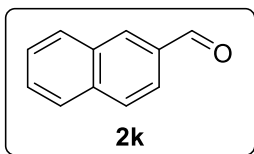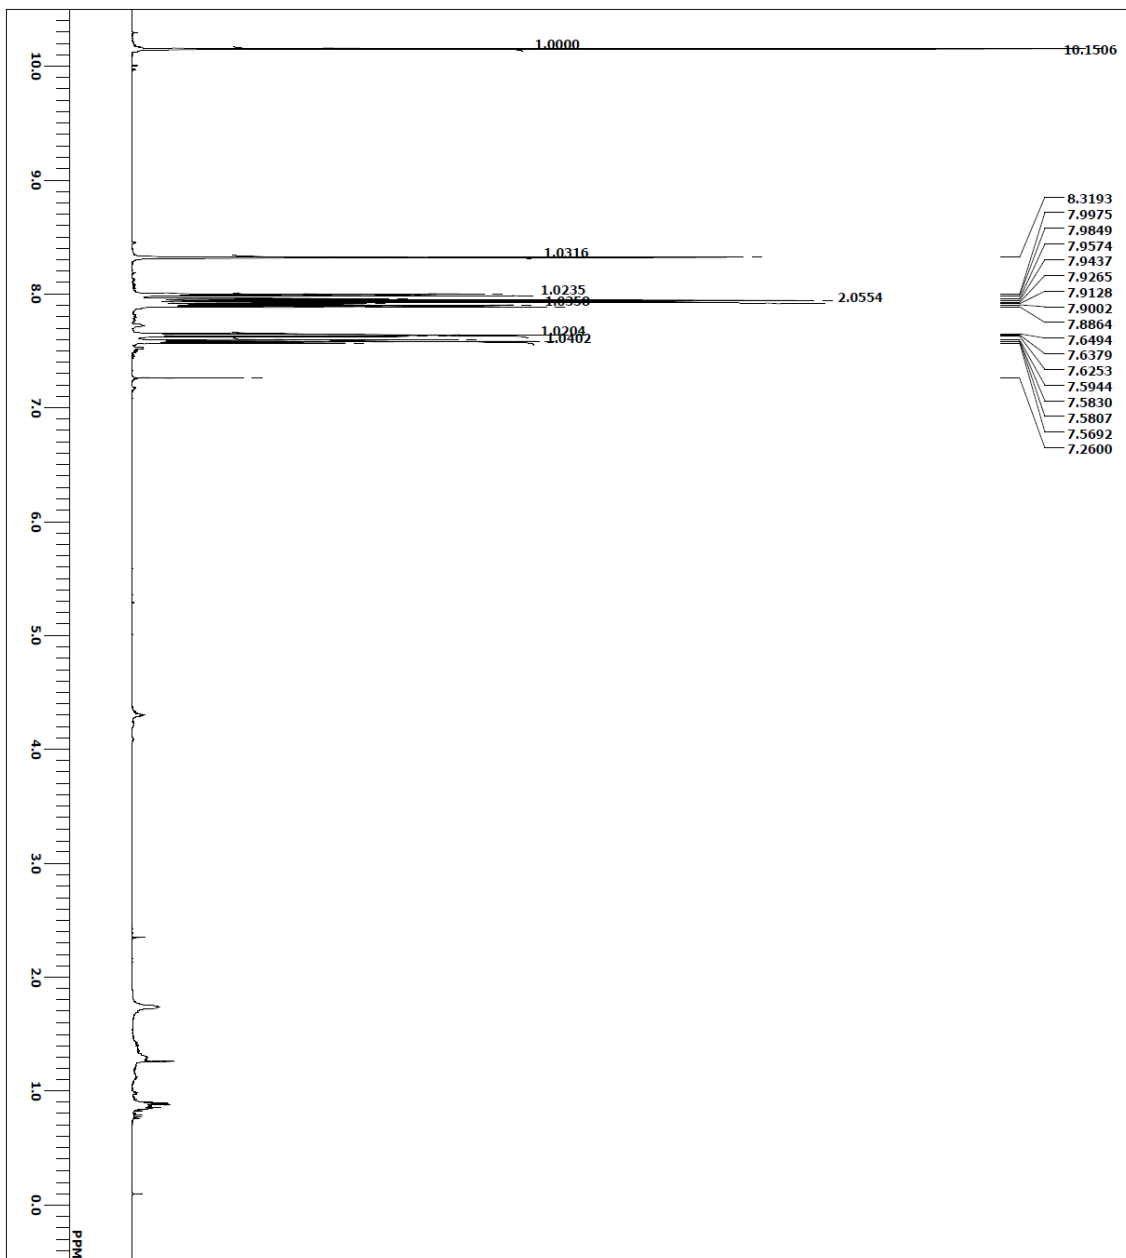

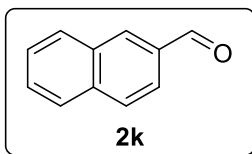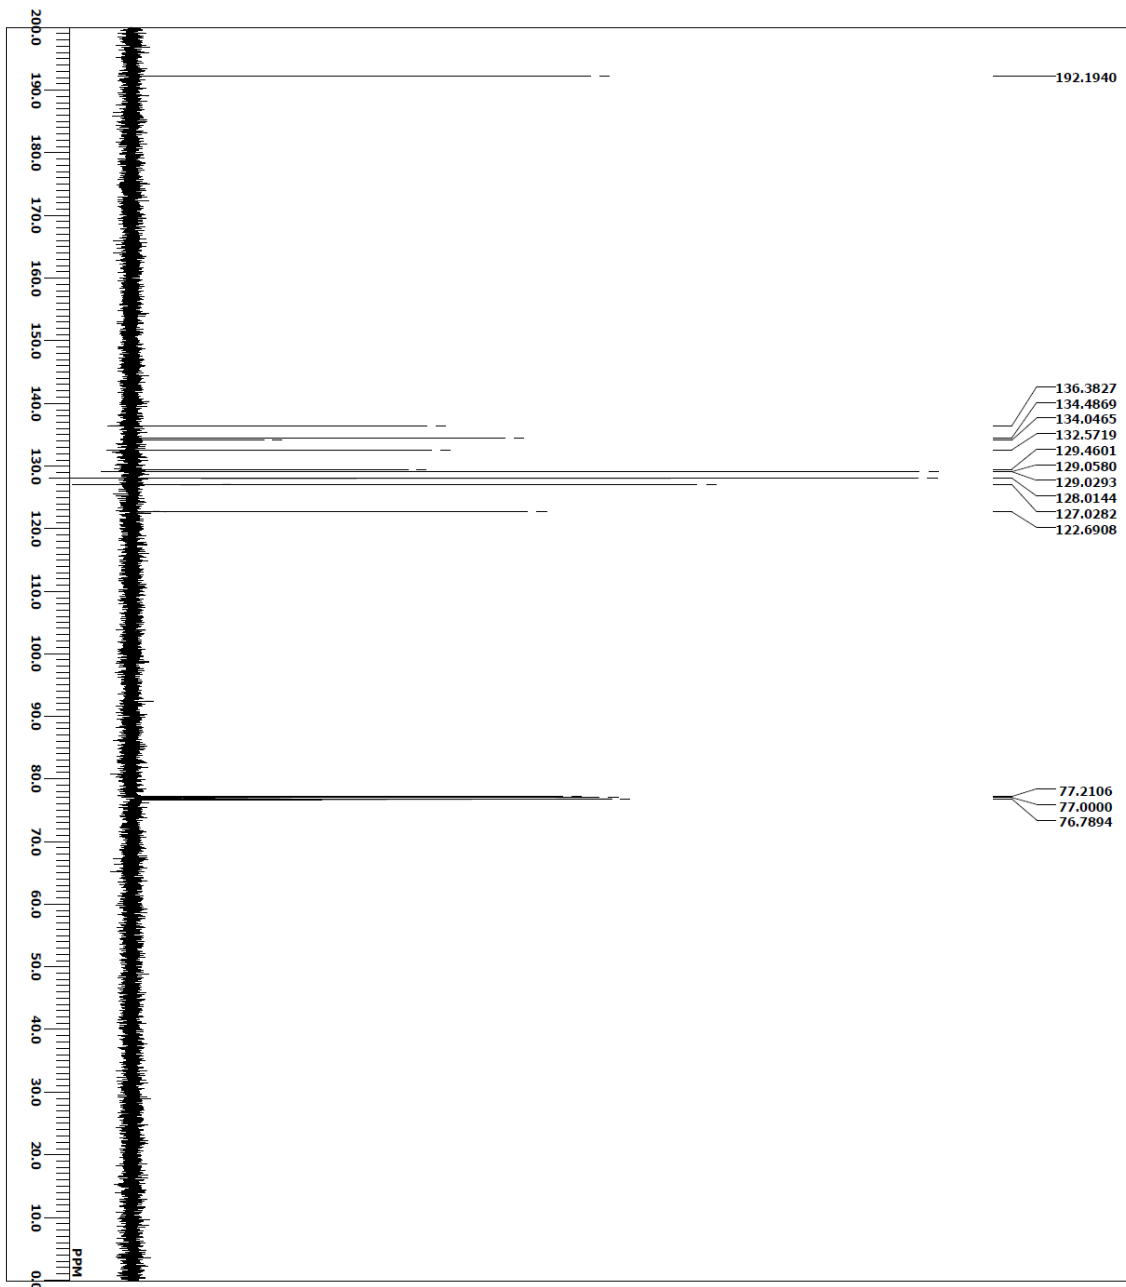

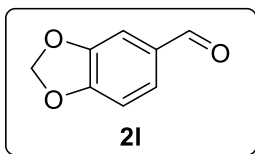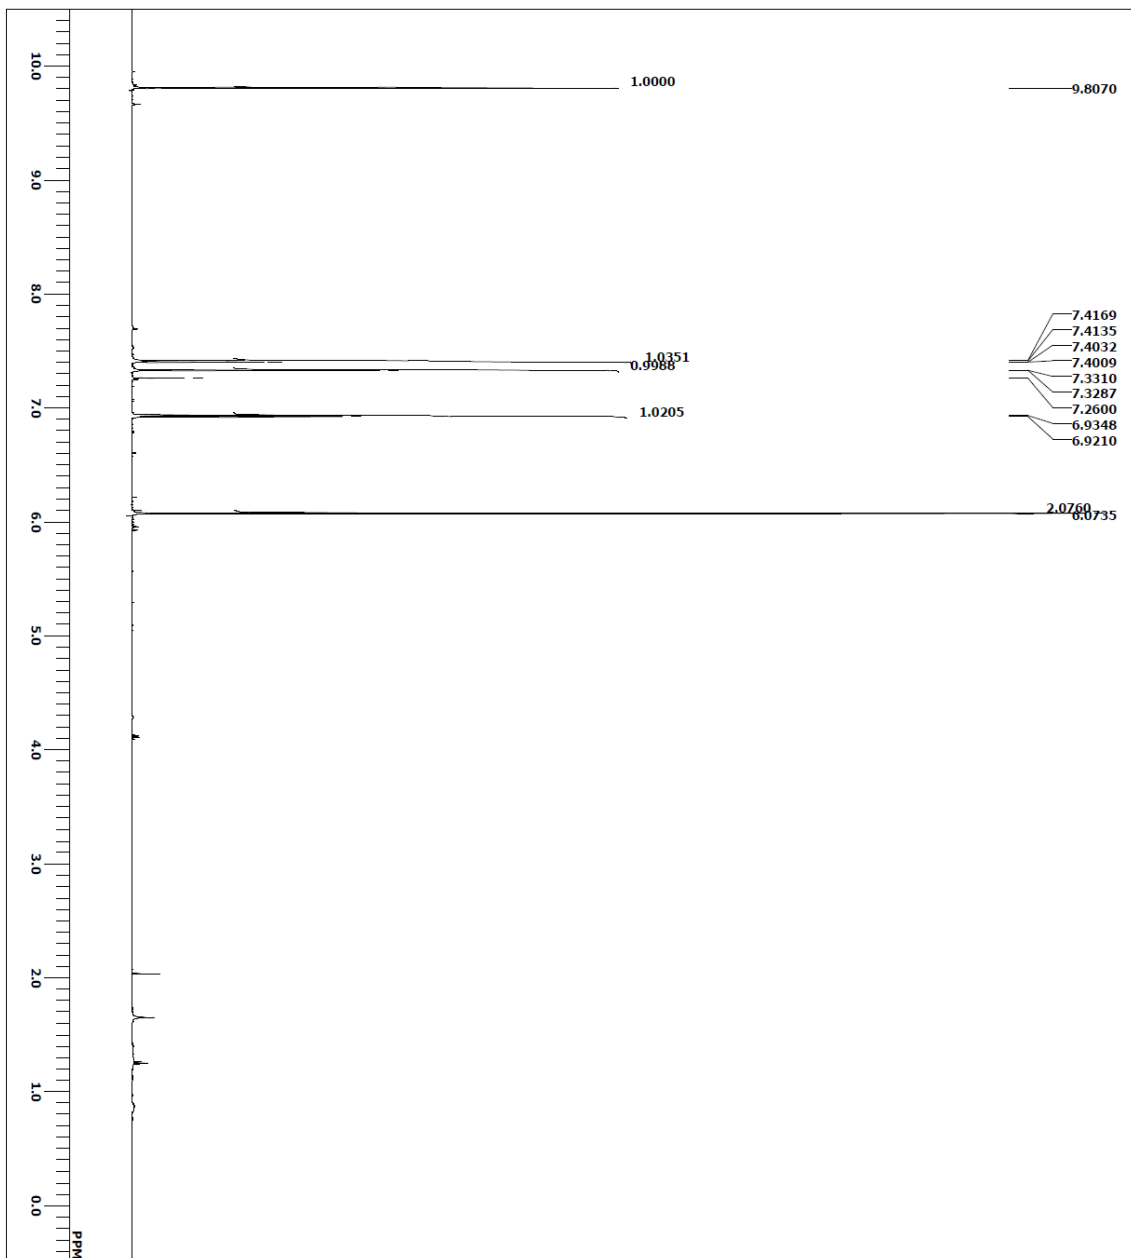

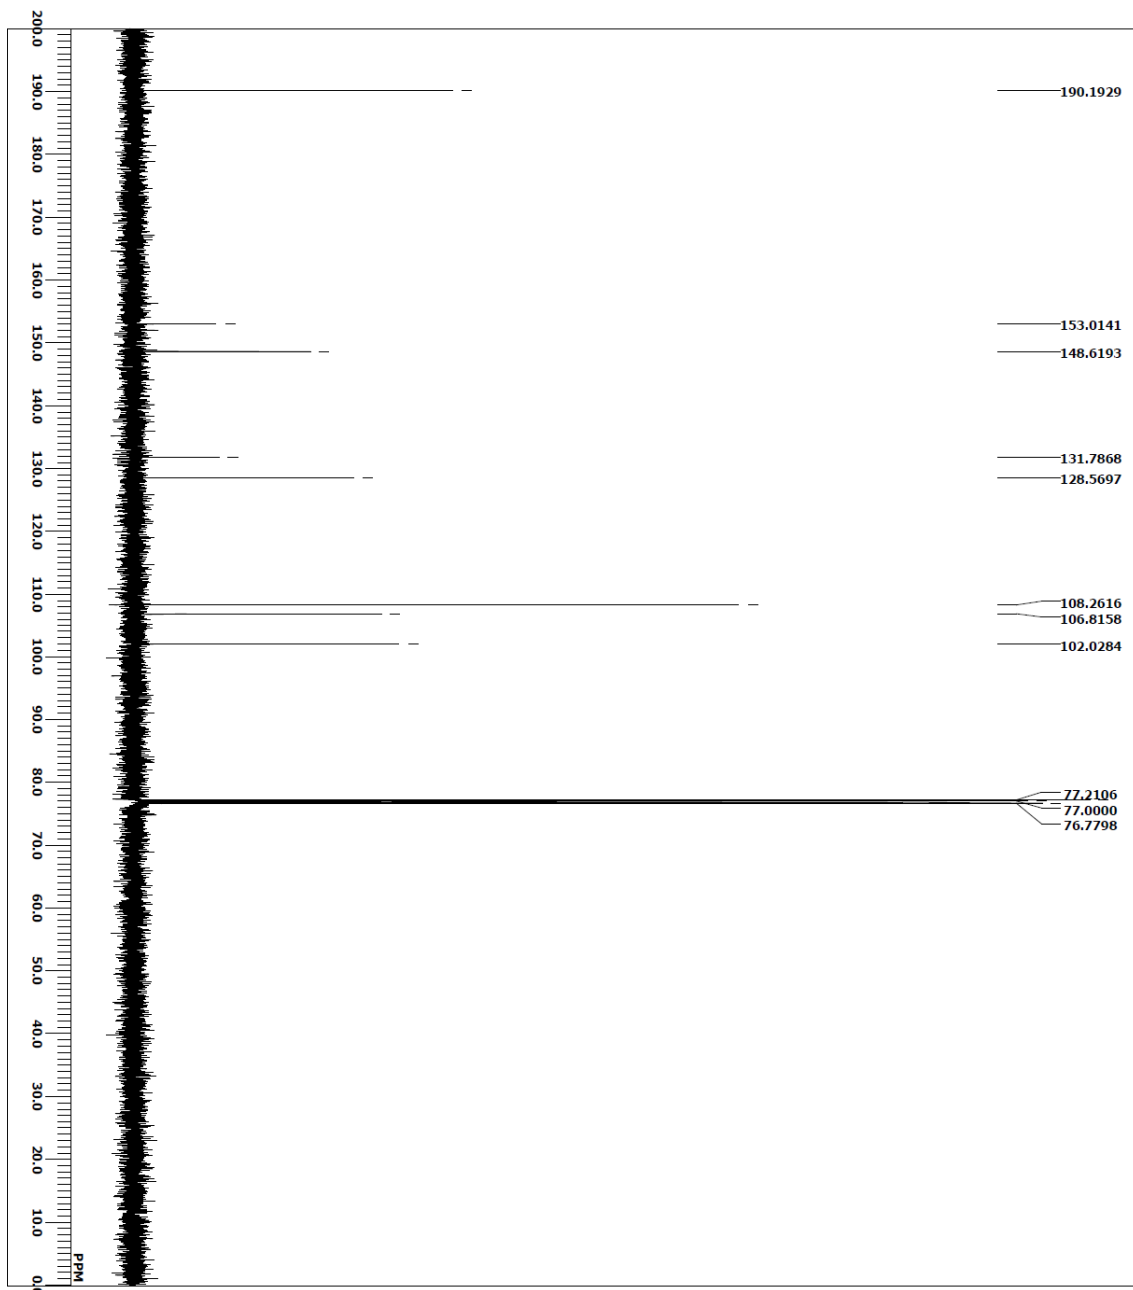

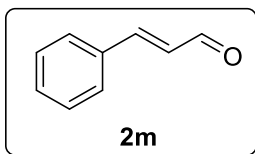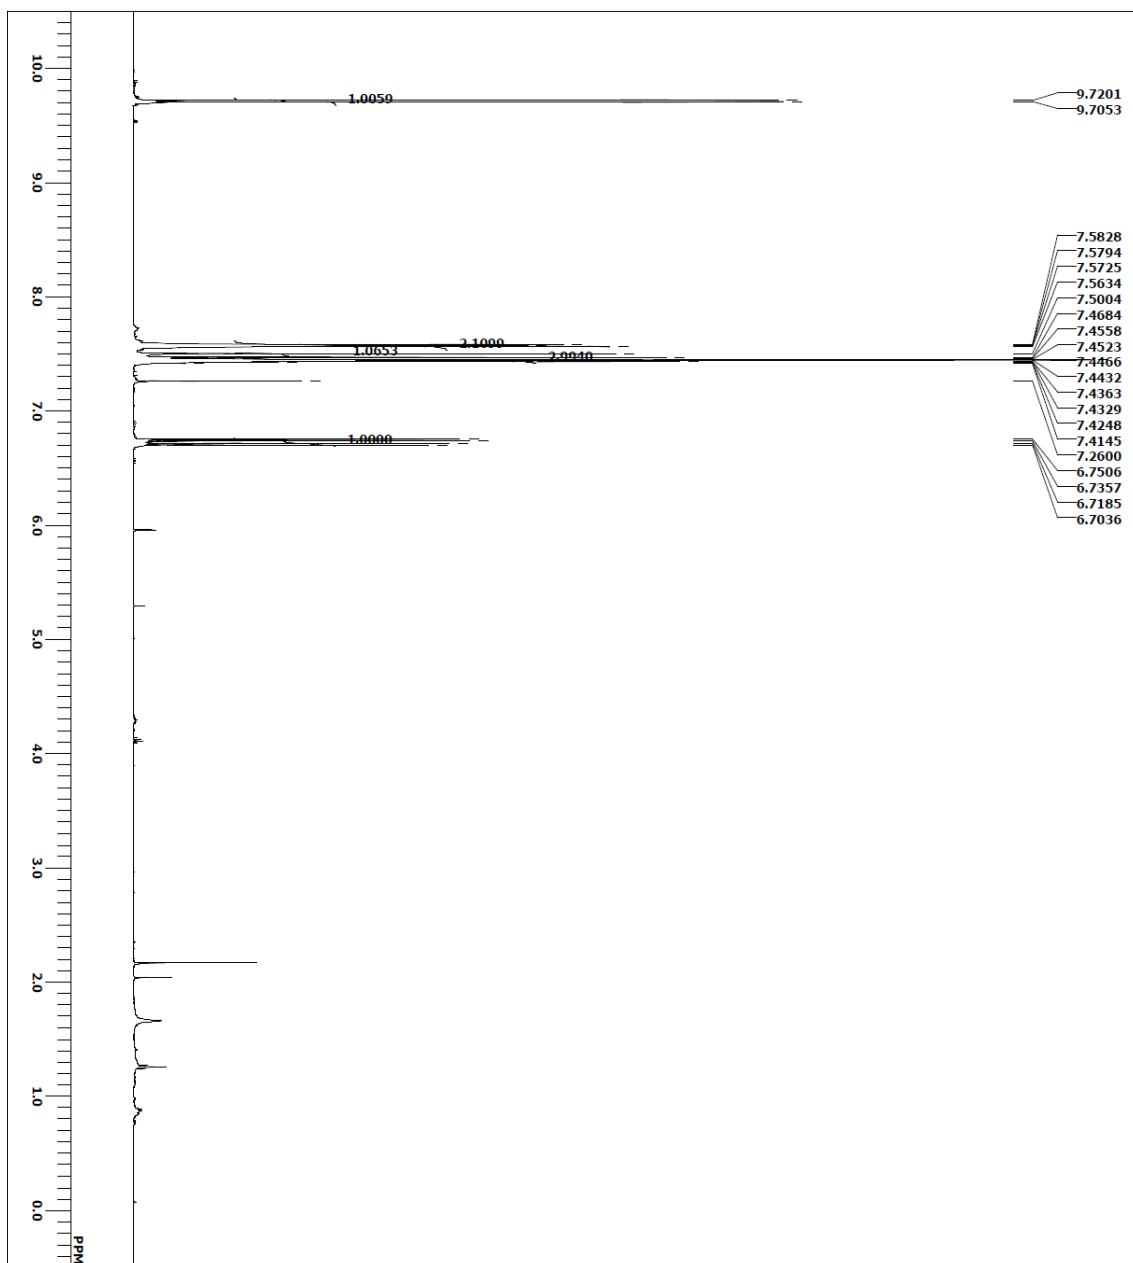



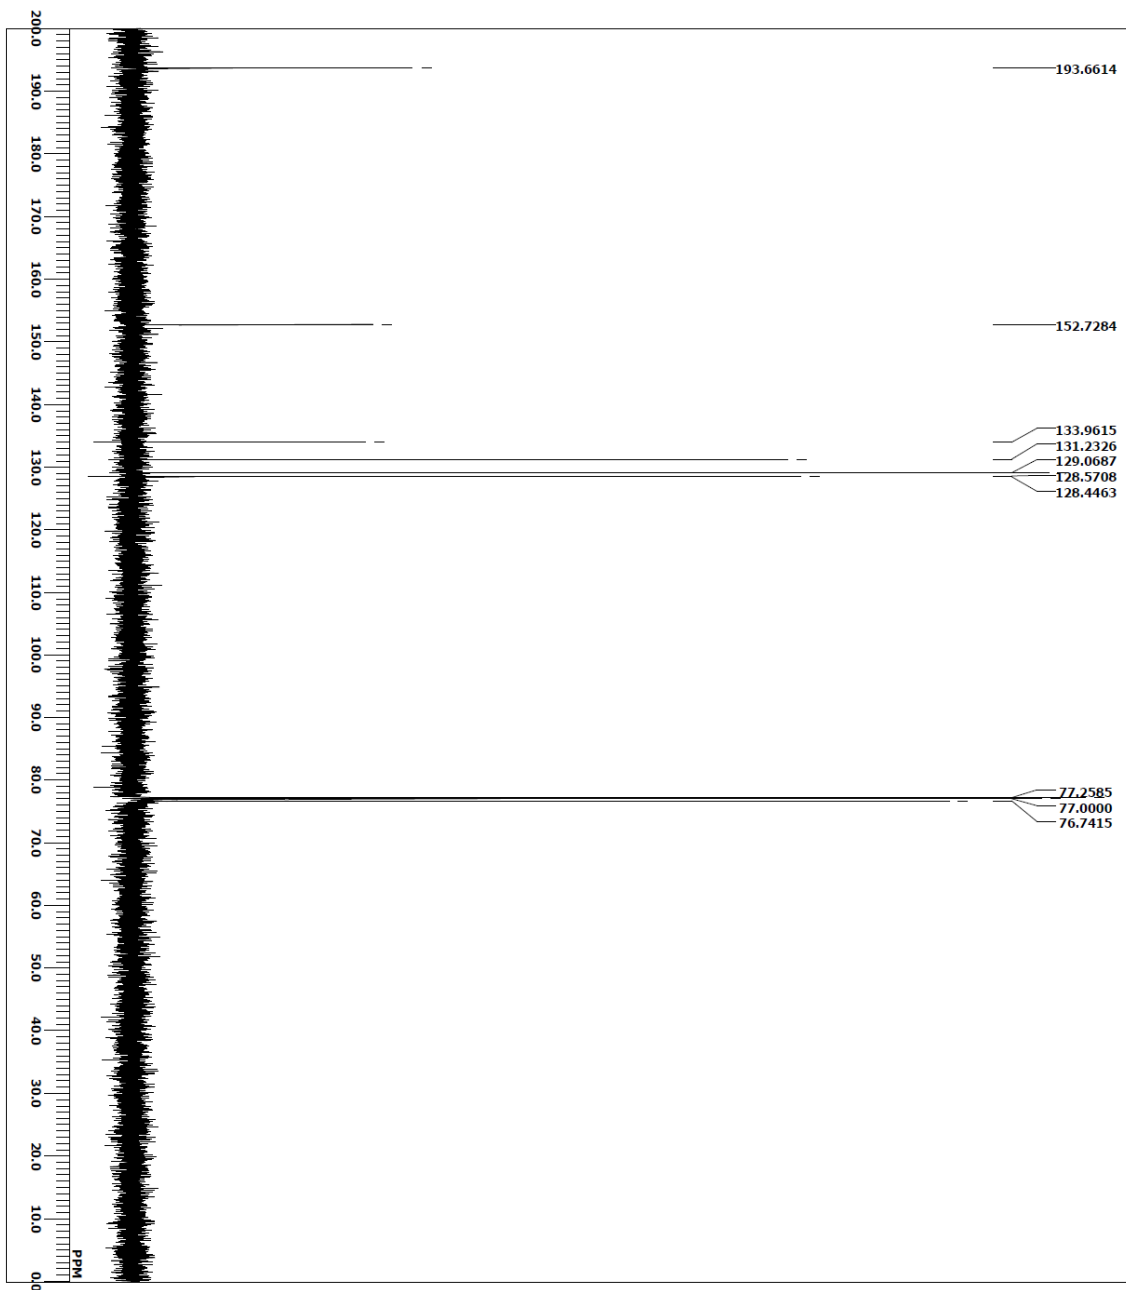

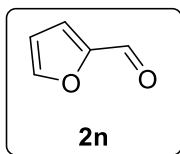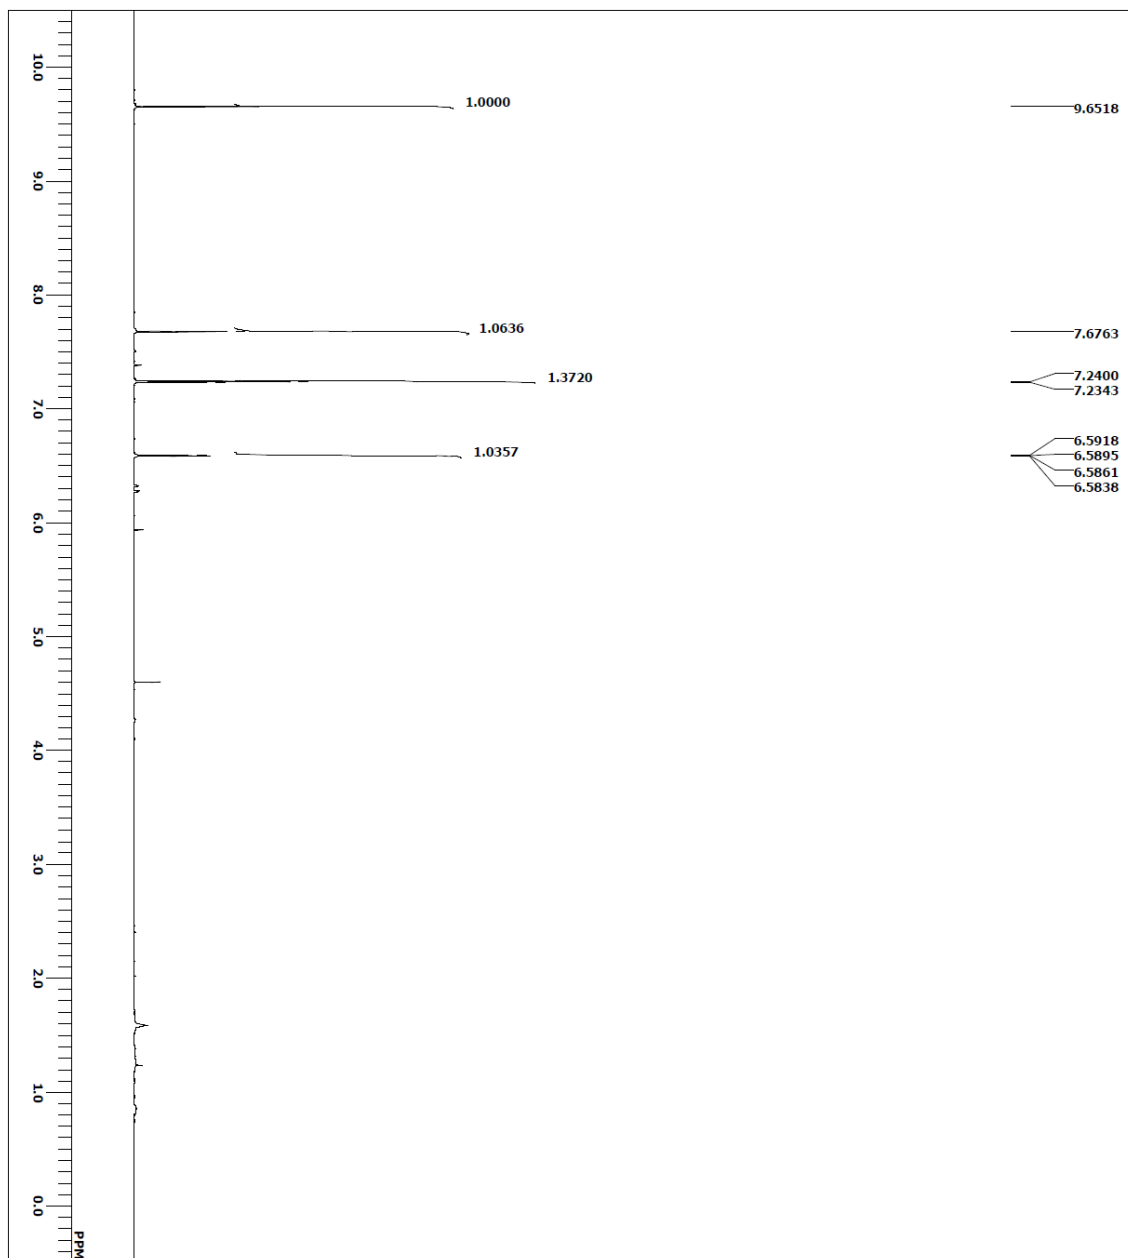

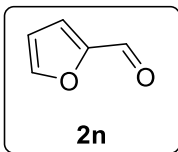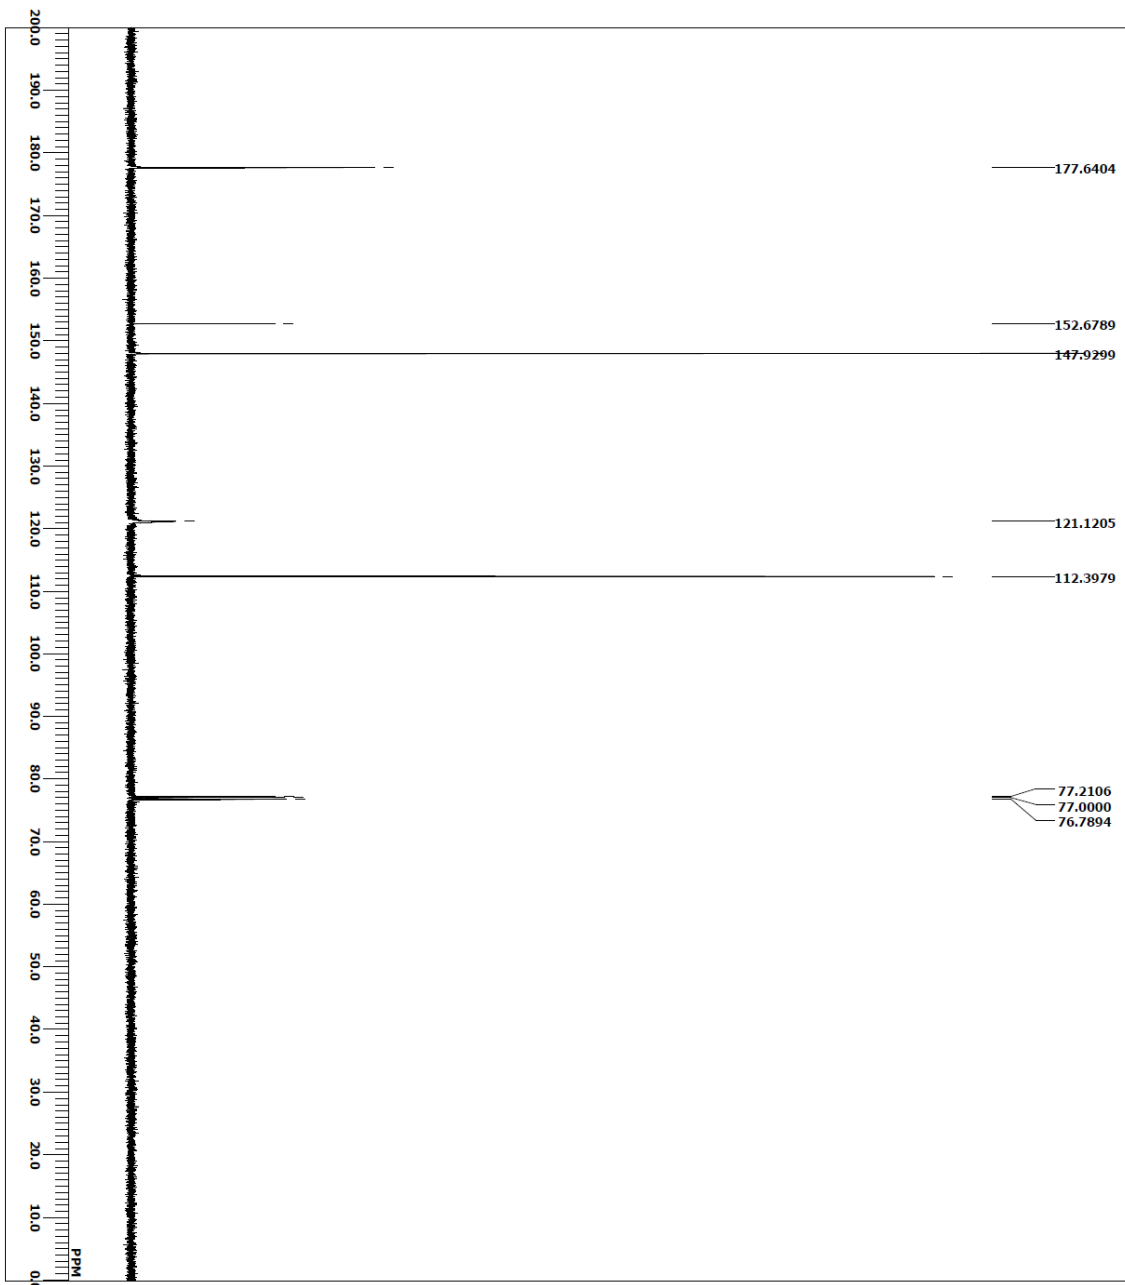

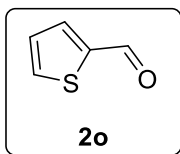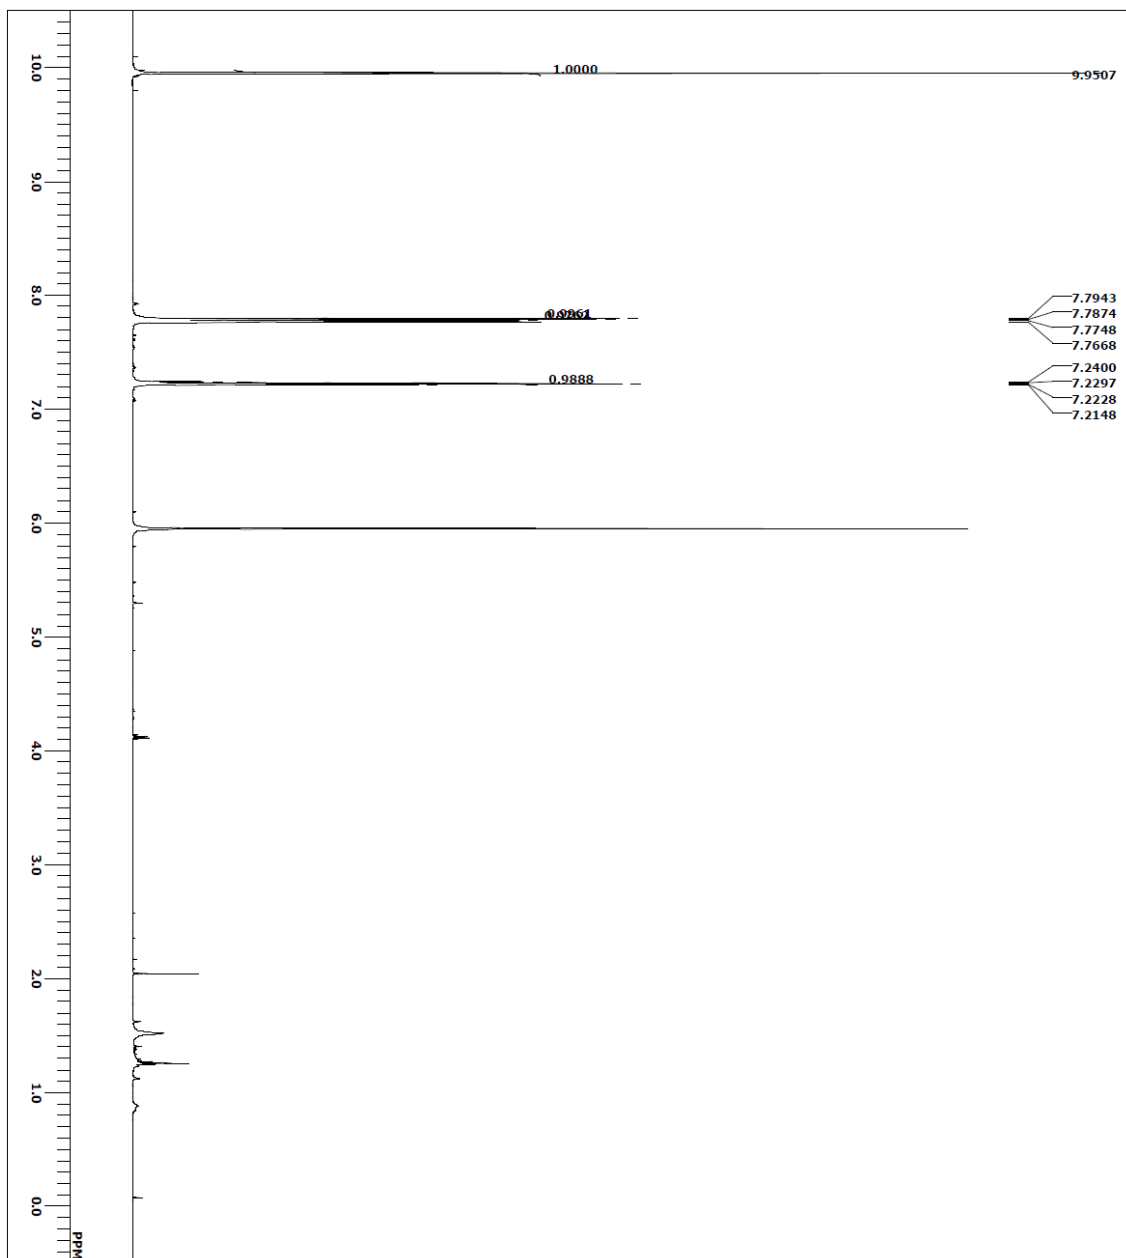

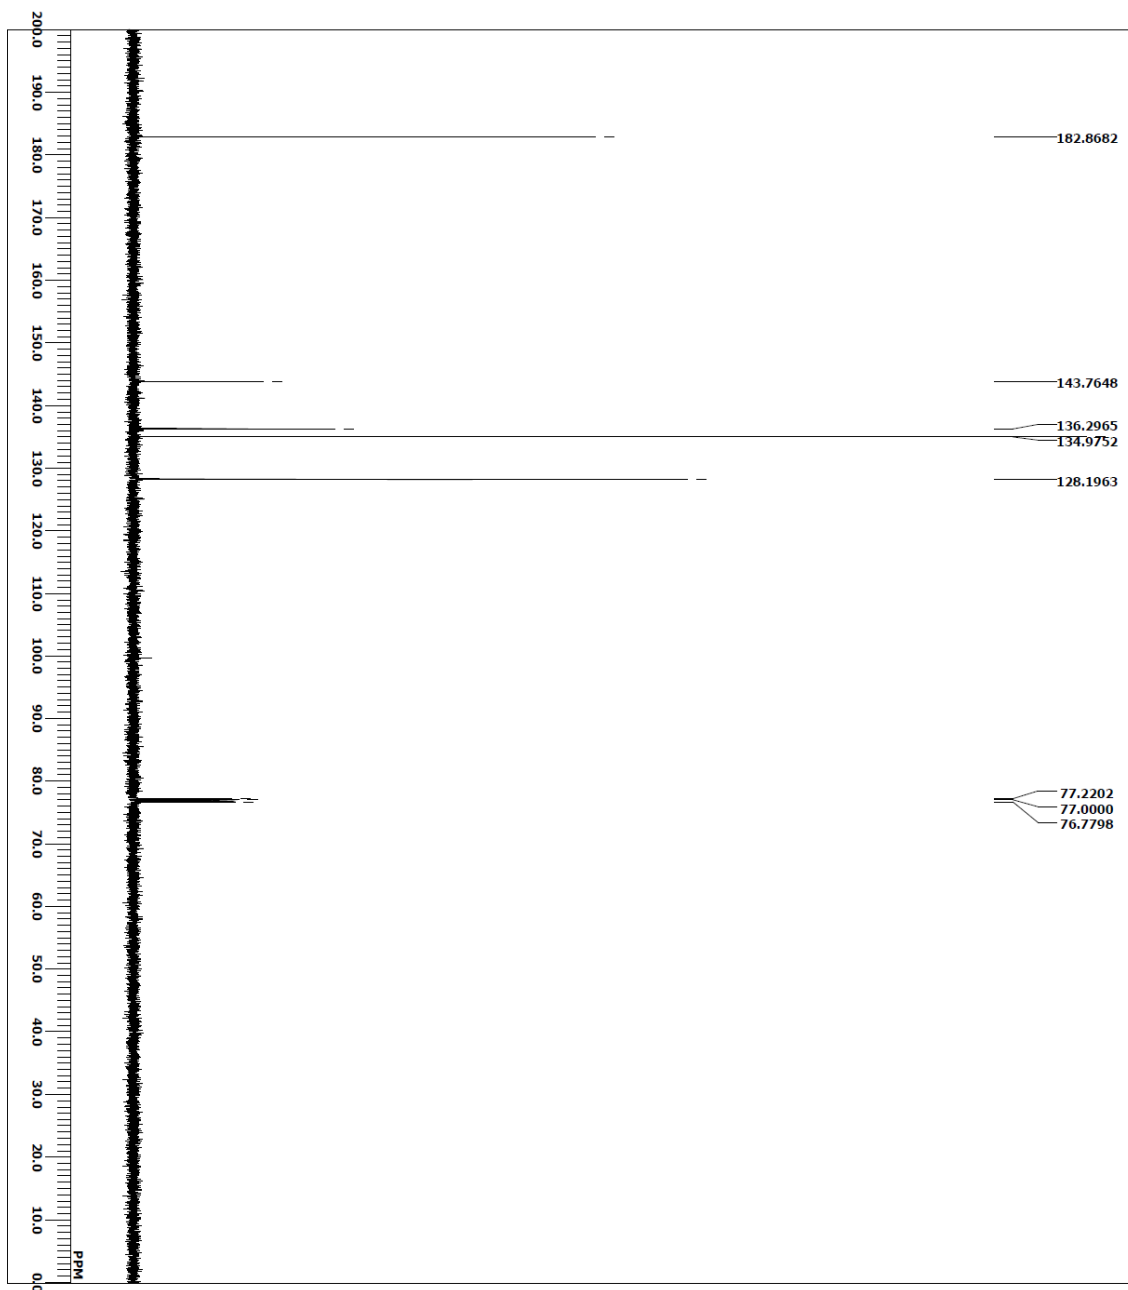

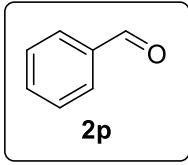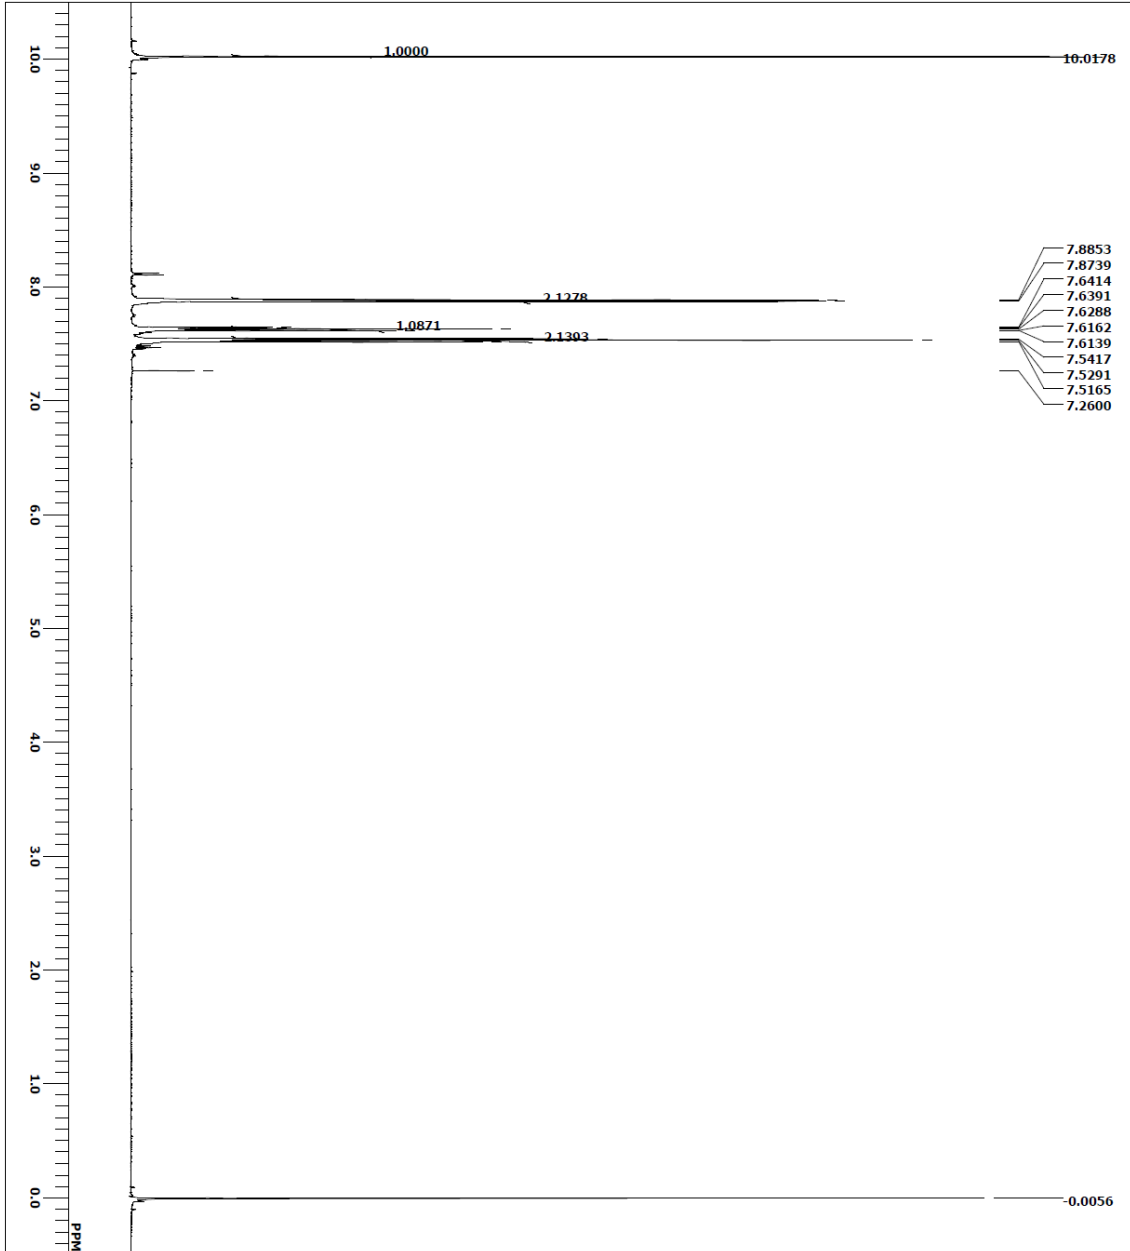

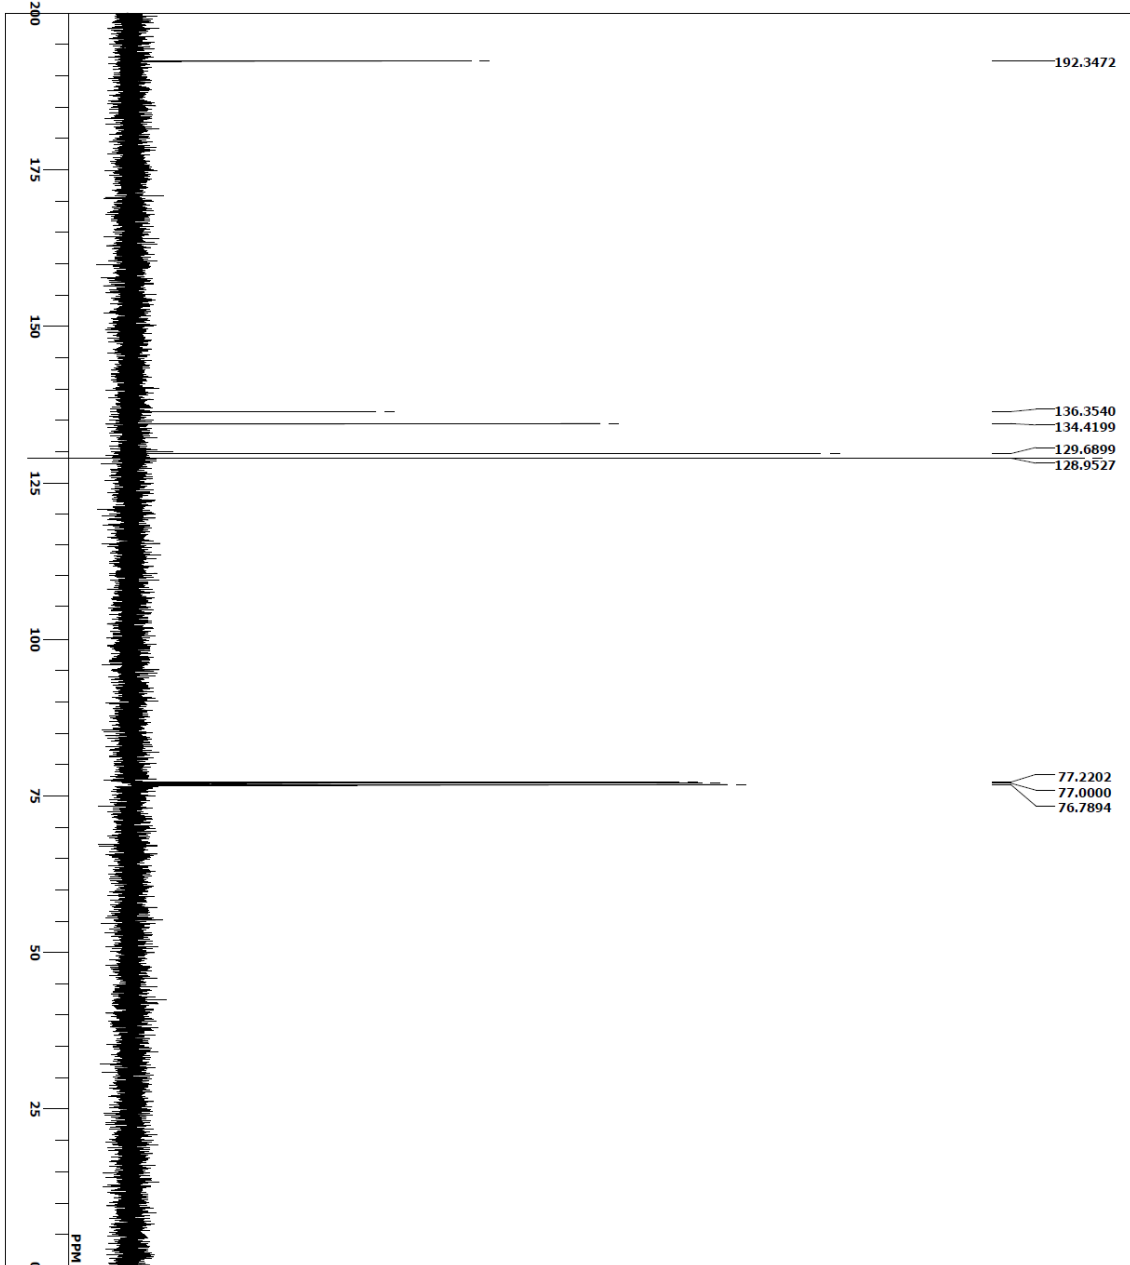

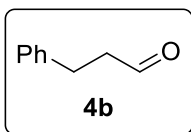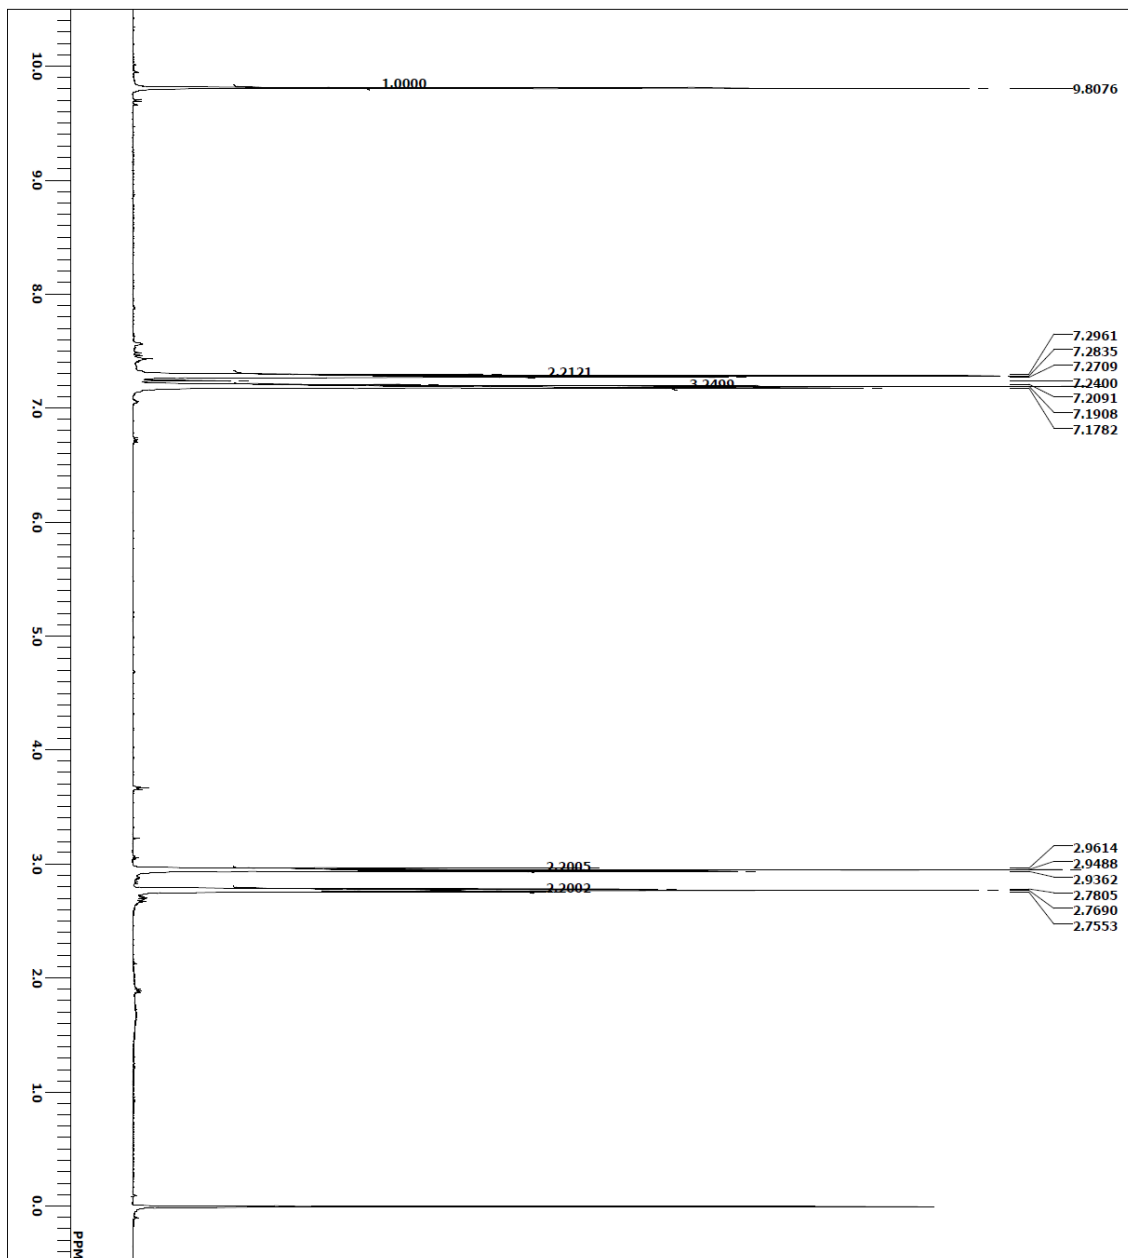



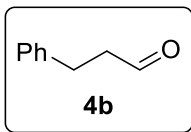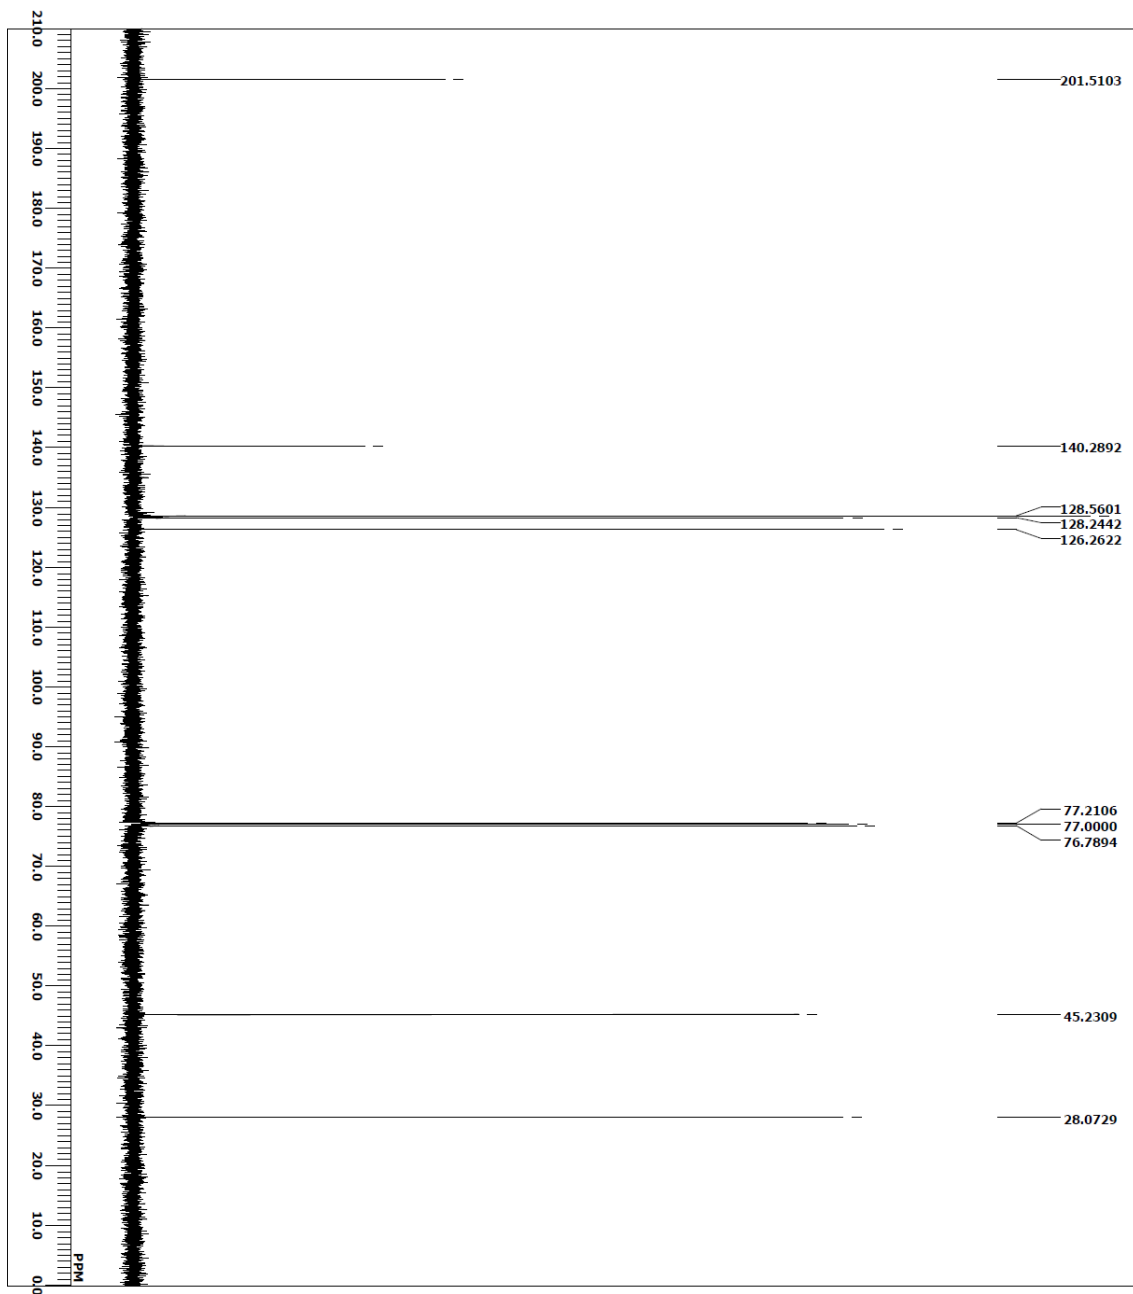

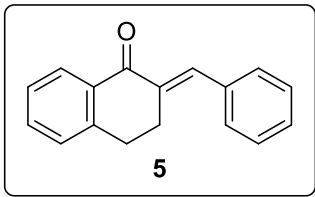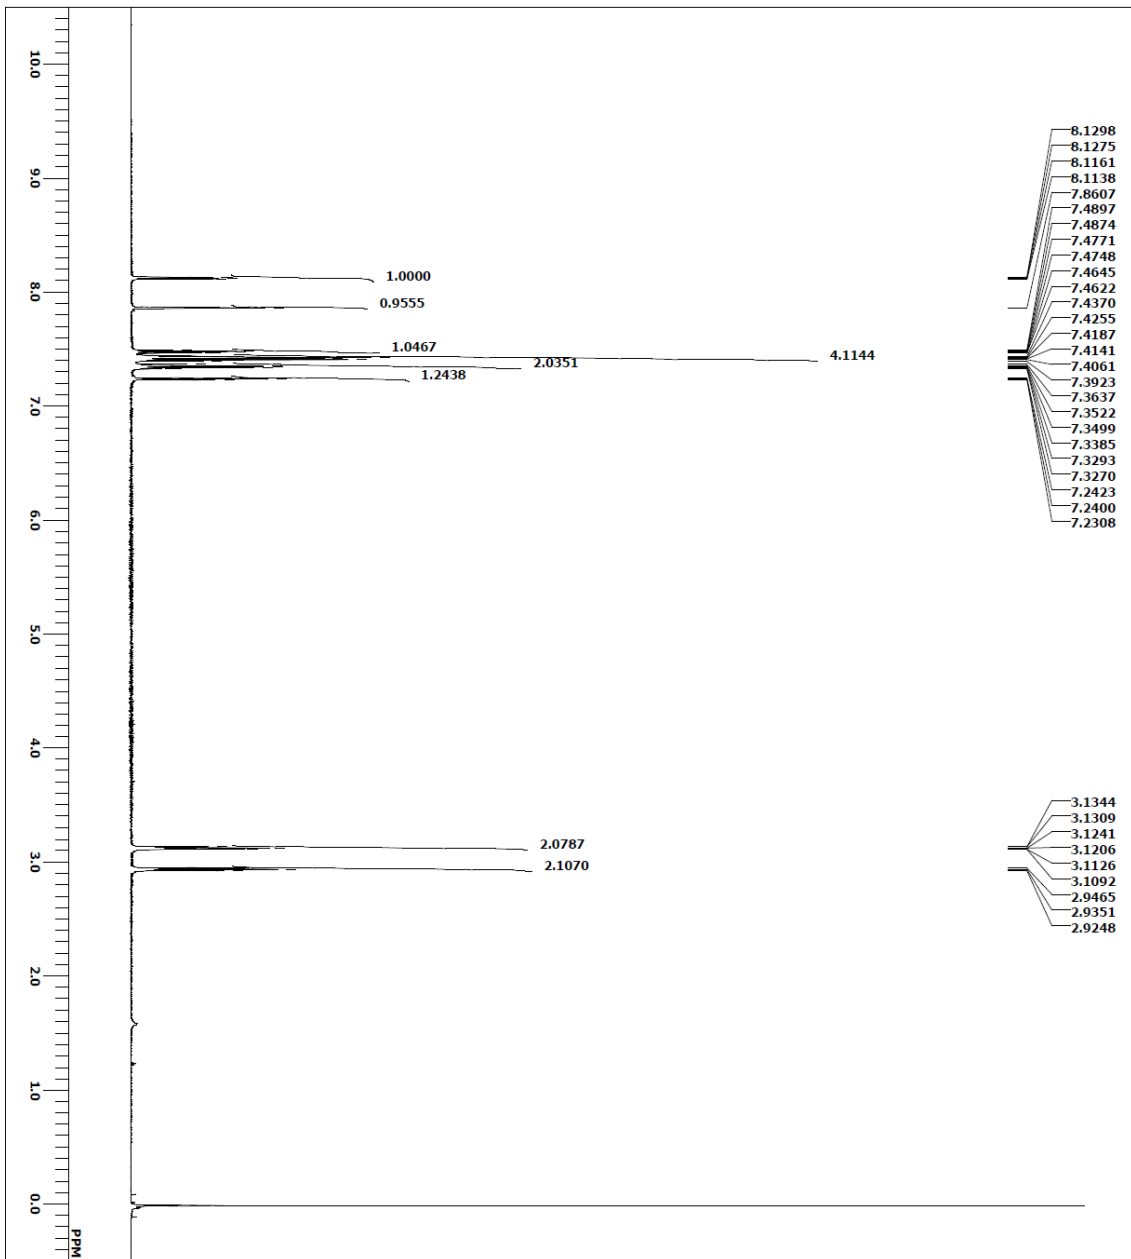

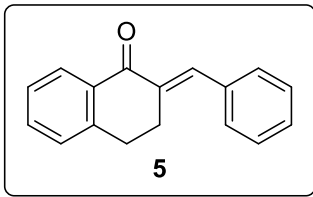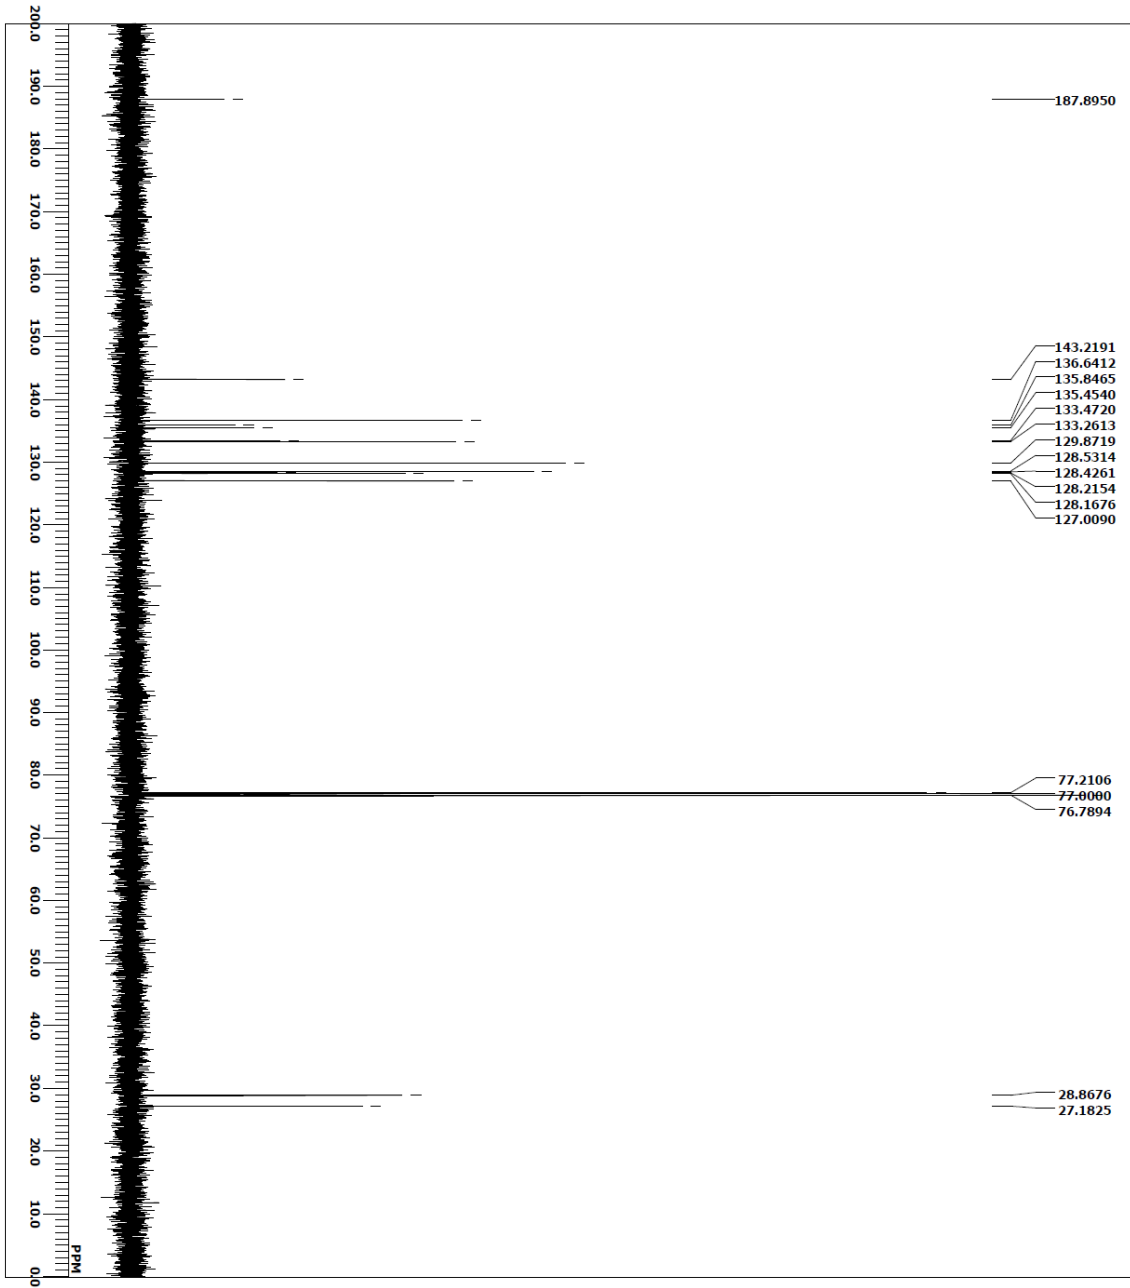

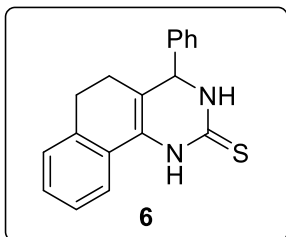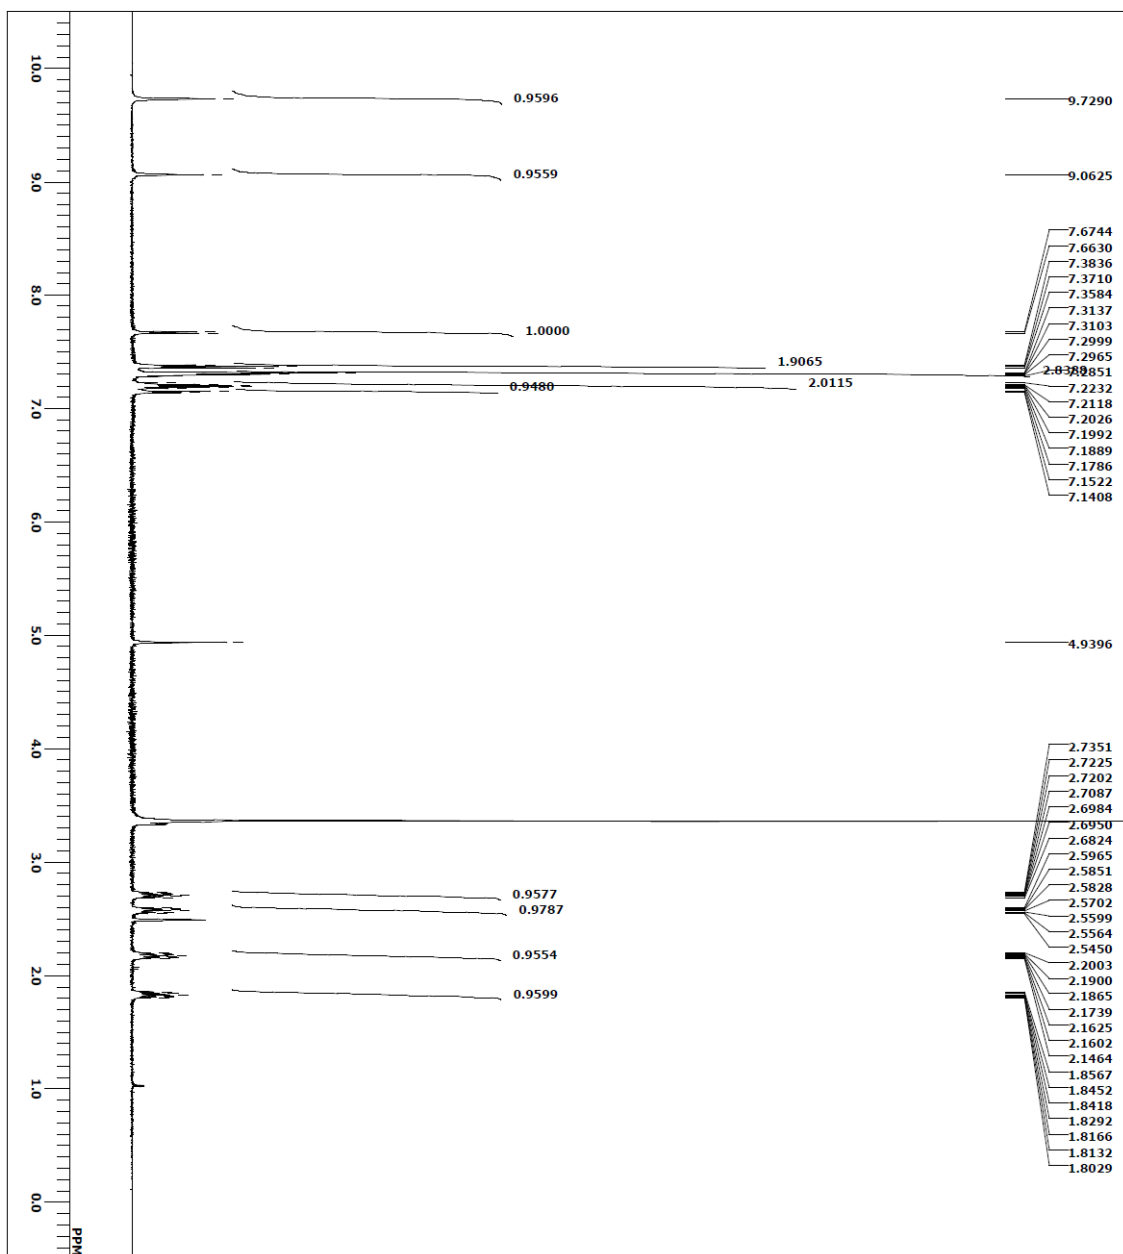

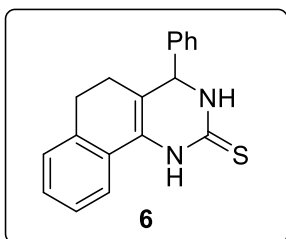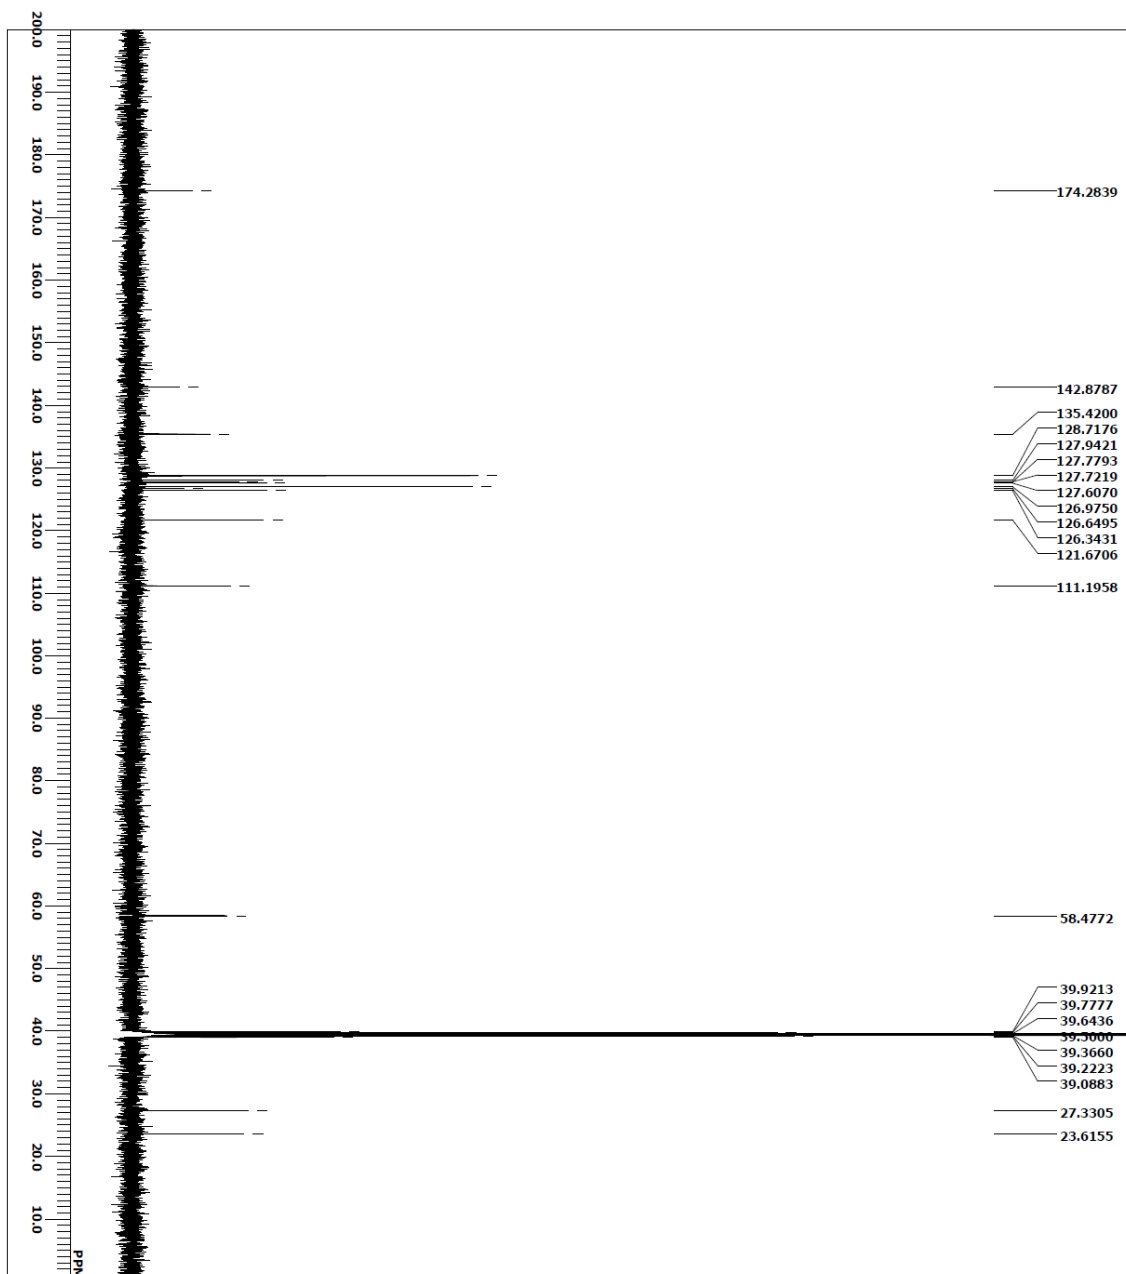

## 10. References

1. Deng, X.; Chen, K.; Tüysüz, H., Protocol for the Nanocasting Method: Preparation of Ordered Mesoporous Metal Oxides. *Chem. Mater.* **2017**, *29*, 40.
2. Bobbitt, J. M.; Eddy, N. A.; Cady, C. X.; Jin, J.; Gascon, J. A.; Gelpí-Dominguez, S.; Zakrzewski, J.; Morton, M. D., Preparation of Some Homologous TEMPO Nitroxides and Oxoammonium Salts; Notes on the NMR Spectroscopy of Nitroxide Free Radicals; Observed Radical Nature of Oxoammonium Salt Solutions Containing Trace Amounts of Corresponding Nitroxides in an Equilibrium R. *J. Org. Chem.* **2017**, *82*, 9279.
3. Yasukawa, T.; Yang, X.; Kobayashi, S., Development of N-Doped Carbon-Supported Cobalt/Copper Bimetallic Nanoparticle Catalysts for Aerobic Oxidative Esterifications Based on Polymer Incarceration Methods. *Org. Lett.* **2018**, *20*, 5172.
4. Yasukawa, T.; Miyamura, H.; Kobayashi, S., Polymer-incarcerated chiral Rh/Ag nanoparticles for asymmetric 1,4-addition reactions of arylboronic acids to enones: Remarkable effects of bimetallic structure on activity and metal leaching. *J. Am. Chem. Soc.* **2012**, *134*, 16963.
5. Tabata, M.; Moriyama, K.; Togo, H., One-Pot Transformation of Methylarenes into Aromatic Aldehydes under Metal-Free Conditions. *Eur. J. Org. Chem.* **2014**, *2014*, 3402.
6. Han, C.; Buchwald, S. L., Negishi Coupling of Secondary Alkylzinc Halides with Aryl Bromides and Chlorides. *J. Am. Chem. Soc.* **2009**, *131*, 7532.
7. Nicklaus, C. M.; Phua, P. H.; Buntara, T.; Noel, S.; Heeres, H. J.; De Vries, J. G., Ruthenium/1,1'-Bis(diphenylphosphino)ferrocene-Catalysed Oppenauer Oxidation of Alcohols and Lactonisation of  $\alpha,\omega$ -Diols using Methyl Isobutyl Ketone as Oxidant. *Adv. Synth. Catal.* **2013**, *355*, 2839.
8. Cheng, C.; Brookhart, M., Efficient Reduction of Esters to Aldehydes through Iridium-Catalyzed Hydrosilylation. *Angew. Chem., Int. Ed.* **2012**, *51*, 9422.
9. Laroche, B.; Saito, Y.; Ishitani, H.; Kobayashi, S., Basic Anion-Exchange Resin-Catalyzed Aldol Condensation of Aromatic Ketones with Aldehydes in Continuous Flow. *Org. Process Res. Dev.* **2019**, *23*, 961.
10. Sivakumar, M.; Prabakaran, K.; Seenivasa Perumal, M., Base-mediated one-pot synthesis of 3,4,5,6-tetrahydro-4-substituted benzo[h]quinazoline-2(1H)-thione derivatives and evaluation of their antioxidant activity. *Synth. Commun.* **2018**, *48*, 197.
